# Supplementary material for: Merging Counter-Propagation and Back-Propagation Algorithms: Overcoming the Limitations of Counter-Propagation Neural Network Models
Source: Int J Mol Sci. 2024 Apr 9;25(8):4156. doi: 10.3390/ijms25084156 (PMC11050038; doi:10.3390/ijms25084156)
Supplement: Supplementary file 1 [file ijms-25-04156-s001.zip › Suppl_Drgan_et_alR1.xlsx]

## Sheet: Table S1
Table S1: Smlies strings of compounds and experimental logS values.
id	SMILES	split CP-ANN	Experimental logS	MolWt	MolLogP	MolMR	HeavyAtomCount	NumHAcceptors	NumHDonors	NumHeteroatoms	NumRotatableBonds	NumValenceElectrons	NumAromaticRings	NumSaturatedRings	NumAliphaticRings	RingCount	TPSA	LabuteASA	BalabanJ	BertzCT
1	FC1CCC(CC1)C(=O)C2CCC(F)CC2	TR	-4.3967	218.202	3.1958	56.2325	16	1	0	3	2	80	2	0	0	2	17.07	91.346	2.31563	452.961
2	O=C(OCCCOCCCOC(=O)C1CCCCC1)C2CCCCC2	TR	-4.5955	342.391	3.4972	93.502	25	5	0	5	10	132	2	0	0	2	61.83	147.072	1.44705	582.151
3	CC1CCC(O)C(C)C1.CC2CCC(C)C(O)C2.CC3CC(C)CC(O)C3.CC4CCC(O)CC4C.CC5CCCC(O)C5C.CC6CCCC(C)C6O	TR	-1.9803	733.002	12.0542	225.485	54	6	6	6	0	288	6	0	0	6	121.38	322.891	3.24e-07	1804.42
4	CC(C)=CCC\C(C)=C/CO	TR	-2.3206	154.253	2.6714	49.5078	11	1	1	1	4	64	0	0	0	0	20.23	69.4388	3.54439	150.256
5	CC(OC1CCC(Cl)CC1C)C(O)=O	TR	-2.466	214.648	2.50032	53.9148	14	2	1	4	3	76	1	0	0	1	46.53	87.2637	2.81766	349.22
6	CC(C)=C1CCC(=CC1)C	TR	-4.2873	136.238	3.453	45.982	10	0	0	0	0	56	0	0	1	1	0	63.6387	2.66873	178.215
7	CCCCCCCC\C=C/CCCCCCCC(O)=O.NCCNCCO	TR	-4.8091	386.621	4.6355	116.098	27	4	4	5	19	162	0	0	0	0	95.58	167.359	0	305.933
8	CCCCCCCCCCCCOC(=O)C(C)O	TR	-4.6341	258.402	3.8313	74.4838	18	3	1	3	12	108	0	0	0	0	46.53	111.918	3.05312	190.178
9	C=CC(=O)OCCOC1CCCCC1	TR	-2.5636	192.214	1.7946	53.093	14	3	0	3	5	74	1	0	0	1	35.53	82.9551	2.16214	292.661
10	OC(=O)CCCCCCCCC=C	TR	-3.5528	184.279	3.3778	54.7688	13	1	1	2	9	76	0	0	0	0	37.3	80.6548	2.90929	141.026
11	CC1CCC(CC1)C(C)(C)C	TR	-4.472	148.249	3.29252	49.879	11	0	0	0	0	60	1	0	0	1	0	69.2561	2.99375	223.21
12	OC(=O)C1CCCCC1	TR	-1.445	128.171	1.6513	34.2108	9	1	1	2	1	52	0	1	1	1	37.3	54.8788	2.31219	103.484
13	CCCN(CCC)C(=O)SCC	TS	-2.7032	189.324	2.9815	55.683	12	2	0	3	5	72	0	0	0	0	20.31	79.7033	3.81079	121.697
14	CC(CC1=CC(=CC(=O)N1O)C)CC(C)(C)C.NCCO	TR	-3.9055	298.427	1.94622	85.7037	21	5	3	5	4	122	1	0	0	1	88.48	126.925	8.85e-07	473.391
15	SCCC(=O)OCC(COC(=O)CCS)(COC(=O)CCS)COC(=O)CCS	TR	-5.1232	488.671	1.4252	120.149	29	12	4	12	16	168	0	0	0	0	105.2	192.299	5.35412	436.053
16	CCOC(=O)CC(C)CC(C)(C)C	TR	-3.823	186.295	3.0119	54.486	13	2	0	2	4	78	0	0	0	0	26.3	81.6637	3.74028	155.963
17	C[C@]12C[C@H](O)[C@H]3[C@@H](CCC4=CC(=O)C=C[C@]34C)[C@@H]1CC[C@]2(O)C(=O)CO	TR	-3.1784	360.45	1.5576	95.0484	26	5	3	5	2	142	0	3	4	4	94.83	153.341	1.74728	723.913
18	CCCCOCCOCCOCC1CC2OCOC2CC1CCC	TS	-4.1511	338.444	3.7177	92.762	24	5	0	5	13	136	1	0	1	2	46.15	144.738	1.63217	475.07
19	CC1=CC[C@H]2C[C@@H]1C2(C)C	TR	-4.7726	136.238	2.9987	43.752	10	0	0	0	0	56	0	1	3	3	0	63.3225	2.29663	186.215
20	C[Si](C)(C)O[Si](C)(C)C	TR	-4.9095	162.381	2.6728	47.777	9	1	0	3	2	56	0	0	0	0	9.23	60.6861	3.74642	76.2114
21	CCCCCCCC\C=C/CCCCCCCC(O)=O.NCCNCCN	TR	-4.4101	385.637	4.6019	118.066	27	4	4	5	19	162	0	0	0	0	101.37	167.905	0	305.933
22	CCCCOC(=O)C1CCCCC1C(=O)OCCCC	TR	-4.3877	278.348	3.6004	76.823	20	4	0	4	8	110	1	0	0	1	52.6	119.631	2.71239	398.858
23	CC(C)CC(C)CC(C)\C=C(/C)C1CC(=O)OC1=O	TR	-4.4255	266.381	3.7308	75.363	19	3	0	3	6	108	0	1	1	1	43.37	115.955	2.53341	368.19
24	CCCCCCCCCCCCCCCC(=O)NCC(O)=O	TR	-5.5931	313.482	4.6685	90.9575	22	2	2	4	16	130	0	0	0	0	66.4	135.61	3.10759	279.506
25	C\1C\C=C/CC\C=C/CC/C=C1	TR	-5.3652	162.276	4.0092	55.122	12	0	0	0	0	66	0	0	1	1	0	75.679	2.30411	121.193
26	C1CCC(CC1)C2CCC(CC2)C3CCCCC3	TR	-6.1833	230.31	5.0206	77.314	18	0	0	0	2	86	3	0	0	3	0	107.546	1.95147	548.716
27	C1CC2CCC3CCCC4CCC(C1)C2C34	TS	-6.1788	202.256	4.584	70.146	16	0	0	0	0	74	4	0	0	4	0	93.4554	2.50596	666.62
28	CC(C)CCCCCCCOC(=O)CCCCCCCCC(=O)OCCCCCCCC(C)C	TR	-7.2524	482.79	9.1868	143.934	34	4	0	4	25	202	0	0	0	0	52.6	211.873	3.28066	416.722
29	CCCCN(CCCC)C1CCC2C(OC3CC(C)C(NC4CCCCC4)CC3C25OC(=O)C6CCCCC56)C1	TR	-7.4043	532.684	8.71322	161.188	40	5	1	5	9	204	4	0	2	6	50.8	236.304	1.51269	1540.02
30	CCCCC(CC)COC(=O)C1CCC(NC2nC(NC3CCC(CC3)C(=O)NC(C)(C)C)nC(NC4CCC(CC4)C(=O)OCC(CC)CCCC)n2)CC1	TR	-8.1853	766	10.3771	223.397	56	11	4	12	21	300	4	0	0	4	156.46	331.566	1.50095	1746.28
31	CC1CCCC(C)C1OCC(O)=O	TR	-2.2566	180.203	1.76684	49.0468	13	2	1	3	3	70	1	0	0	1	46.53	76.9605	2.80692	297.696
32	NC1CC(CCC1O)[N+]([O-])=O	V	-2.2056	154.125	0.8826	39.1736	11	4	2	5	1	58	1	0	0	1	89.39	62.2185	3.15155	297.879
33	CCCCCCCl	TR	-3.1224	120.623	2.8055	34.862	7	0	0	1	4	44	0	0	0	0	0	50.8672	2.44747	23.361
34	CCCCCCC(C)=O	TR	-2.1537	128.215	2.5458	39.44	9	1	0	1	5	54	0	0	0	0	17.07	57.4554	2.82887	76.6368
35	CCS	TR	-0.8459	62.137	0.9361	19.527	3	1	1	1	0	20	0	0	0	0	0	26.2593	1.63299	2.75489
36	CCCCBr	TR	-2.1978	137.02	2.1814	28.702	5	0	0	1	2	32	0	0	0	0	0	41.7016	2.19061	11.1194
37	[O-][N+](=O)C1CC(Cl)CCC1Cl	TR	-3.3642	192.001	2.9016	43.1164	11	2	0	5	1	58	1	0	0	1	43.14	72.6909	3.23221	300.634
38	CC(C)(C1CCC(O)CC1)C2CCC(O)CC2.OC(=O)C=C.ClCC3CO3	TR	-3.6804	392.879	4.3047	106.634	27	4	3	6	4	146	2	1	1	3	90.29	164.05	2.98e-07	671.742
39	CCCCCOC(=O)CC	TR	-2.2505	144.214	2.1298	40.775	10	2	0	2	5	60	0	0	0	0	26.3	62.5689	2.96178	89.2584
40	FC(F)=C(F)Cl	TR	-2.161	116.469	2.2603	16.203	6	0	0	4	0	36	0	0	0	0	0	37.2145	3.67595	58.8624
41	NCCCCCCCCCCC(O)=O	TR	-2.4008	201.31	2.5406	58.2432	14	2	2	3	10	84	0	0	0	0	63.32	86.6843	2.88406	137.249
42	C\C=C1/CC2CC1C=C2	TR	-3.1768	120.195	2.5287	39.111	9	0	0	0	0	48	0	1	2	2	0	56.2679	2.28903	174.477
43	CCO	TR	1.2337	46.069	-0.0014	12.7598	3	1	1	1	0	20	0	0	0	0	20.23	19.8984	1.63299	2.75489
44	COC1CCC(OC)CC1	TR	-2.2455	138.166	1.7038	39.546	10	2	0	2	2	54	1	0	0	1	18.46	60.3884	2.79725	167.917
45	CN=C=S	TR	-0.9832	73.12	0.719	20.95	4	2	0	2	0	22	0	0	0	0	12.36	30.3583	3.10861	44
46	CC(C)CCCCCCCO	TR	-3.3244	158.285	2.9753	49.6258	11	1	1	1	7	68	0	0	0	0	20.23	70.818	2.79642	69.273
47	CCC(=O)OCC1CCCCC1	TR	-2.345	164.204	2.1398	46.529	12	2	0	2	3	64	1	0	0	1	26.3	72.1662	2.38454	241.275
48	CCN(CC)CC	TR	-0.1377	101.193	1.3481	33.462	7	1	0	1	3	44	0	0	0	0	3.24	46.3238	2.9923	25.6515
49	CSC	TS	-0.9312	62.137	0.9792	19.439	3	1	0	1	0	20	0	0	0	0	0	25.2273	1.63299	2.75489
50	ClC1CCCC(n1)C(Cl)(Cl)Cl	TR	-3.5061	230.909	3.5617	48.484	11	1	0	5	0	60	1	0	0	1	12.89	84.2291	3.0599	255.004
51	C\C=C/C=C.C/C=C/C=C.C1CC=CC1	TR	-2.4543	204.357	5.2235	73.013	15	0	0	0	2	84	0	0	1	1	0	95.4063	0	182.078
52	CCCCC	TR	-3.007	72.151	2.1965	25.199	5	0	0	0	2	32	0	0	0	0	0	34.199	2.19061	7.50978
53	CCCCOC(C)=O	TR	-1.22	116.16	1.3496	31.541	8	2	0	2	3	48	0	0	0	0	26.3	49.839	2.82235	68.9288
54	NC1CCC(C2CCC(N)CC2[S](O)(=O)=O)C(C1)[S](O)(=O)=O	TR	-2.6919	344.37	1.0114	80.332	22	6	4	10	3	118	2	0	0	2	160.78	126.426	2.90429	872.077
55	CC(C)=CCC\C(C)=C\CO	TS	-2.3519	154.253	2.6714	49.5078	11	1	1	1	4	64	0	0	0	0	20.23	69.4388	3.54439	150.256
56	CCCCOCCO[P](=O)(OCCOCCCC)OCCOCCCC	TR	-2.7786	398.477	4.5944	102.644	26	7	0	8	21	158	0	0	0	0	72.45	159.174	4.04487	281.113
57	OC1CCCC2CCCnC12	TR	-2.3496	145.161	1.9404	43.4078	11	2	1	2	0	54	2	0	0	2	33.12	64.1269	2.91316	378.724
58	C\C=C\C	TR	-1.9395	56.108	1.5824	20.488	4	0	0	0	0	24	0	0	0	0	0	27.1445	2.54919	15.2193
59	CC(=O)C1CCCCC1	TR	-1.2804	120.151	1.8892	36.4465	9	1	0	1	1	46	1	0	0	1	17.07	54.3228	2.98145	201.067
60	CCCCOC(=O)CCC	TR	-2.361	144.214	2.1298	40.775	10	2	0	2	5	60	0	0	0	0	26.3	62.5689	3.05238	89.2584
61	OC(=O)C1CCCCC1C(O)=O	TR	-1.4246	166.132	1.083	40.3606	12	2	2	4	2	62	1	0	0	1	74.6	68.0728	3.26708	296.585
62	CC1CCCC(C)C1O	TR	-1.2924	122.167	2.00904	37.5808	9	1	1	1	0	48	1	0	0	1	20.23	54.9555	3.24783	195.558
63	NC1CCC(Cl)CC1Cl	TR	-2.4172	162.019	2.5756	40.8744	9	1	1	3	0	48	1	0	0	1	26.02	63.3778	3.17168	222.298
64	CC/C=C/CC/C=C/C=C	V	-3.3419	136.238	3.475	48.002	10	0	0	0	5	56	0	0	0	0	0	63.9549	3.11409	118
65	CCCCCCCCCC(O)=O	TR	-3.4452	172.268	3.2117	50.2458	12	1	1	2	8	72	0	0	0	0	37.3	74.9795	2.86139	110.406
66	CC(C)C	TR	-2.9776	58.124	1.6623	20.512	4	0	0	0	0	26	0	0	0	0	0	27.8341	2.32379	4.75489
67	CCCC	TS	-2.9776	58.124	1.8064	20.582	4	0	0	0	1	26	0	0	0	0	0	27.8341	1.97474	2
68	OC(=O)CC1CCC(O)CC1	TR	-0.3991	152.149	1.0193	39.4466	11	2	2	3	2	58	1	0	0	1	57.53	63.9113	2.7363	250.545
69	COC1CCC(COC(C)=O)CC1	TR	-2.474	180.203	1.7583	48.464	13	3	0	3	3	70	1	0	0	1	35.53	77.2798	2.53756	276.726
70	NC1nC(N)nC(n1)C2CCCCC2	TR	-2.4942	187.206	0.703	54.0878	14	5	2	5	1	70	2	0	0	2	90.71	80.8272	2.5213	419.96
71	CC(=C)C(=O)OC1CC2CCC1(C)C2(C)C	TR	-4.5442	222.328	3.3205	63.923	16	2	0	2	2	90	0	2	2	2	26.3	98.0573	2.15927	342.645
72	OC1CCCCC1C(=O)OC2CCCCC2	TR	-4.5541	220.268	2.8817	60.3953	16	3	1	3	2	86	1	1	1	2	46.53	95.0495	1.9954	367.195
73	CC(=C)[C@@H]1CCC(=CC1)C	TS	-4.3468	136.238	3.3089	45.912	10	0	0	0	1	56	0	0	1	1	0	63.6387	2.49541	162.877
74	CC\C=C/CCOC(=O)C\C=C/CC	TR	-4.5097	196.29	3.2422	59.055	14	2	0	2	7	80	0	0	0	0	26.3	86.6495	3.35272	192.498
75	CCCCCCCCCCCC(=O)OCC(O)CO	TR	-4.6602	274.401	2.8037	75.8956	19	4	2	4	13	114	0	0	0	0	66.76	116.712	3.18396	206.322
76	COC1CCC(C(O)C1)C(=O)C2CCCCC2	TR	-4.5803	228.247	2.6318	64.5333	17	3	1	3	3	86	2	0	0	2	46.53	99.2877	2.38287	532.419
77	CCOC(=O)C1CCCCC1	TR	-2.3999	150.177	1.8633	42.3985	11	2	0	2	2	58	1	0	0	1	26.3	65.8013	2.69301	228.578
78	OC(=O)CCC1CCCCC1	TR	-1.4058	150.177	1.7038	42.3988	11	1	1	2	3	58	1	0	0	1	37.3	65.482	2.45302	228.578
79	CC(C)=CCC\C(C)=C\C=O	TR	-2.4117	152.237	2.878	48.486	11	1	0	1	4	62	0	0	0	0	17.07	68.806	3.62576	171.312
80	CNCCCN1C2CCCCC2CCC3CCCCC13	TR	-3.6576	266.388	3.5328	85.8417	20	2	1	2	4	104	2	0	1	3	15.27	120.982	1.99617	529.636
81	CC1CCCCC1	TR	-2.2063	92.141	1.99502	31.179	7	0	0	0	0	36	1	0	0	1	0	43.7963	3.02147	129.966
82	OC(=O)CCCCC(O)=O.C1CNCCN1	TR	-0.6233	232.28	-0.1048	59.479	16	4	4	6	5	94	0	1	1	1	98.66	95.035	3.15e-07	177.486
83	NC(N)=O	TR	0.9578	60.056	-0.9762	13.7708	4	1	2	3	0	24	0	0	0	0	69.11	23.5806	2.80304	29.0196
84	NC1CCCC(Cl)C1	TR	-1.3734	127.574	1.9222	35.8644	8	1	1	2	0	42	1	0	0	1	26.02	53.0746	3.07766	168.388
85	CCCCCCCCCCCCCCC(C)C1CC(C)CC(C)C1O	TR	-7.3357	346.599	8.20374	111.691	25	1	1	1	14	144	1	0	0	1	20.23	156.795	2.04578	463.409
86	C1CC=CC1	TR	-2.1049	68.119	1.7265	22.991	5	0	0	0	0	28	0	0	1	1	0	32.5036	2.32385	38
87	CC(C)C1CCC(C)CC1O	TR	-2.488	156.269	2.4395	47.3498	11	1	1	1	1	66	0	1	1	1	20.23	69.8121	2.43716	120.041
88	CNC1CCC(O)CC1.CNC2CCC(O)CC2.O[S](O)(=O)=O	TR	-0.8381	344.389	2.215	89.4844	23	6	6	9	2	128	2	0	0	2	139.12	134.55	3.32e-07	603.172
89	CC1CC(C)CC(O)C1	TR	-1.388	122.167	2.00904	37.5808	9	1	1	1	0	48	1	0	0	1	20.23	54.9555	3.16567	165.33
90	CC(C)CC(=O)CC(C)C	TS	-2.4541	142.242	2.6477	43.917	10	1	0	1	4	60	0	0	0	0	17.07	63.8203	3.44439	91.2959
91	NC1CCC2C(O)CC(CC2C1)[S](O)(=O)=O	TR	-2.6799	239.252	1.3743	59.8398	16	4	3	6	1	84	2	0	0	2	100.62	91.8758	2.8519	663.819
92	COC1CCC(CC1O)[C@@H]2CC(=O)C3C(O)CC(O[C@@H]4O[C@H](CO[C@@H]5O[C@@H](C)[C@H](O)[C@@H](O)[C@H]5O)[C@@H](O)[C@H](O)[C@H]4O)CC3O2	TR	-5.0105	610.565	-1.1566	140.699	43	15	8	15	7	236	2	2	3	5	234.29	244.507	1.304	1319.3
93	CC1(C)[C@H]2CC[C@]1(C)C(C2)OC(=O)C=C	TR	-4.5831	208.301	2.9304	59.306	15	2	0	2	2	84	0	2	2	2	26.3	91.6924	2.18606	305.658
94	CC(C)[C@@H]1CC[C@@H](C)CC1=O	V	-2.4919	154.253	2.6477	46.35	11	1	0	1	1	64	0	1	1	1	17.07	69.1794	2.50769	148.952
95	CC1CC(C)CC(C)C1	TS	-3.3827	120.195	2.61186	40.653	9	0	0	0	0	48	1	0	0	1	0	56.5262	3.16567	160.801
96	CC(=O)OC(C)(C)CCCC(=C)C=C	TS	-3.5974	196.29	3.2406	59.033	14	2	0	2	6	80	0	0	0	0	26.3	86.6495	3.80892	226.476
97	CCCN(CCC)CCC	TR	-2.4722	143.274	2.5184	47.313	10	1	0	1	6	62	0	0	0	0	3.24	65.4186	3.29508	47.4839
98	CCCCCC(CO)CCC	TS	-3.5182	158.285	2.9753	49.6258	11	1	1	1	7	68	0	0	0	0	20.23	70.818	3.2039	71.273
99	FC(F)C(F)(F)F	TR	-1.4165	120.02	1.8138	12.059	7	0	0	5	0	44	0	0	0	0	0	35.9319	3.5412	51.5907
100	CC1CCCC(O)C1C	TS	-1.4242	122.167	2.00904	37.5808	9	1	1	1	0	48	1	0	0	1	20.23	54.9555	3.24783	195.558
101	CC(=O)OC1CCC(CC1)[N+]([O-])=O	TR	-2.5993	181.147	1.5201	44.4054	13	4	0	5	2	68	1	0	0	1	69.44	74.0893	2.80945	330.502
102	CC(C)COC(=O)C1CC(N)C(Cl)C(N)C1	TR	-2.7383	242.706	2.3172	65.3973	16	4	2	5	3	88	1	0	0	1	78.34	99.5142	2.84328	381.966
103	ClC1nC(Cl)nC(Cl)n1	TR	-2.6223	184.413	1.8318	34.857	9	3	0	6	0	48	1	0	0	1	38.67	66.0001	3.16567	175.065
104	CC12CCC3C(CCC4=CC(=O)C=CC34C)C1CCC2=O	TR	-2.8205	284.399	3.8634	81.623	21	2	0	2	0	112	0	3	4	4	34.14	126.229	1.72041	584.374
105	CC[N+](CC)(CC(=O)NC1C(C)CCCC1C)CC2CCCCC2.[O-]C(=O)C3CCCCC3	TR	-1.021	446.591	4.34884	131.674	33	3	1	5	8	174	3	0	0	3	69.23	196.838	3.57e-07	1009.27
106	CCCCCCO	TR	-1.3829	102.177	1.559	31.2278	7	1	1	1	4	44	0	0	0	0	20.23	45.3582	2.44747	23.361
107	CC(C)[C@@H]1CC[C@@H](C)C[C@H]1O	TS	-2.5706	156.269	2.4395	47.3498	11	1	1	1	1	66	0	1	1	1	20.23	69.8121	2.43716	120.041
108	COC(C)(C)C	TR	-0.3235	88.15	1.4313	26.762	6	1	0	1	0	38	0	0	0	0	9.23	39.3126	3.16849	33.6933
109	CCC1CCCCC1.CCC2CC(CC)C(CC)CC2CC.CCC(C)(C3CCCCC3)C4CCCCC4.CC5CCCCC5.CC6CCCCC6C7CCCCC7.CC8CCCC9CCCCC89.C=CC%10CCCCC%10.C%11CCC(CC%11)C%12CCCCC%12.C(CC%13CCCCC%13)C%14CCCCC%14.C%15CCCCC%15.C%16CCC(CC%16)C%17CCCCC%17	TR	-4.5882	1588.4	33.969	533.295	121	0	0	0	15	618	16	1	1	17	0	731.129	1.85e-07	4995.82
110	COC(=O)C1CCCCC1C(=O)OC	TR	-1.6862	194.186	1.2598	49.121	14	4	0	4	2	74	1	0	0	1	52.6	81.4413	3.15384	321.895
111	CCOC(=O)CC(=O)C(F)(F)F	TS	-1.663	184.113	1.071	32.312	12	3	0	6	3	70	0	0	0	0	43.37	66.4972	3.93719	184.968
112	[O-][N+](=O)OCCOCCO[N+]([O-])=O	TR	-1.6905	196.115	-0.5804	36.7118	13	7	0	9	8	76	0	0	0	0	113.97	72.3887	2.9961	153.875
113	CCC(C)(C)C1CCCCC1	V	-4.5007	148.249	3.3742	49.759	11	0	0	0	2	60	1	0	0	1	0	69.2561	2.92844	208.74
114	CC(CCC=O)C1C(=CCCC1(C)C)C	TR	-4.6532	208.345	3.9841	64.724	15	1	0	1	4	86	0	0	1	1	17.07	93.9496	2.74085	250.064
115	CC1(C)C2CCC(C2)C1=C	V	-4.4715	136.238	2.9987	43.752	10	0	0	0	0	56	0	2	2	2	0	63.3225	2.33677	176.477
116	CCCCCCCCCC(=O)OC	TR	-4.6267	186.295	3.3001	54.626	13	2	0	2	8	78	0	0	0	0	26.3	81.6637	2.9511	121.259
117	CCCC[Sn](=O)CCCC	TR	-4.794	248.942	3.0086	45.8705	10	1	0	2	6	60	0	0	0	0	17.07	71.324	3.08635	81.2584
118	COC(=O)C1CCC(C)CC1	TR	-2.5767	150.177	1.78162	42.5185	11	2	0	2	1	58	1	0	0	1	26.3	65.8013	2.89535	248.77
119	NC1CCCCC1N	TR	-0.4396	108.144	0.851	35.2668	8	2	2	2	0	42	1	0	0	1	52.04	48.1112	3.13486	162.638
120	O=C1N[S](=O)(=O)C2CCCCC12	TR	-1.6718	183.188	0.1187	41.094	12	3	1	5	0	62	1	0	1	2	63.24	69.2627	2.8284	449.474
121	CC(C)=CCC\C(C)=C\CCC(C)=O	TR	-3.6974	194.318	4.0483	62.337	14	1	0	1	6	80	0	0	0	0	17.07	87.9009	3.67045	229.62
122	CCCCCC(=O)OCC=C	V	-2.6106	156.225	2.2959	45.298	11	2	0	2	6	64	0	0	0	0	26.3	68.2443	3.15101	118.731
123	CCCCCCCCCCO	V	-3.6312	158.285	3.1194	49.6958	11	1	1	1	8	68	0	0	0	0	20.23	70.818	2.69092	53.8931
124	O=C(OCCOCCOC(=O)C1CCCCC1)C2CCCCC2	TR	-3.9375	314.337	2.717	84.268	23	5	0	5	8	120	2	0	0	2	61.83	134.342	1.5292	554.324
125	ClC1CCC(Cl)C(Cl)C1	TR	-3.7025	181.449	3.6468	41.472	9	0	0	3	0	48	1	0	0	1	0	68.3412	3.17168	219.543
126	COC	TS	0.8844	46.069	0.2626	12.933	3	1	0	1	0	20	0	0	0	0	9.23	20.2177	1.63299	2.75489
127	C1CCC2CCCCC2C1	TR	-3.5674	132.206	2.5654	43.084	10	0	0	0	0	52	1	0	1	2	0	61.8853	2.41429	200.235
128	C=CC(=O)OCCCCCCOC(=O)C=C	TR	-2.8193	226.272	2.0052	60.78	16	4	0	4	9	90	0	0	0	0	52.6	95.9245	3.15308	219.403
129	NC1CCC(CC1)N=NC2CCCCC2	TR	-3.7597	197.241	3.6842	61.4724	15	3	1	3	2	74	2	0	0	2	50.74	88.2752	2.15299	446.053
130	CCCCC(O)=O	TR	-0.4907	102.133	1.2612	27.1608	7	1	1	2	3	42	0	0	0	0	37.3	43.1548	2.82194	59.1005
131	C\C=C\OC1CCC(CC1)O\C=C\C	TR	-3.9037	196.29	3.398	57.842	14	2	0	2	4	80	0	1	1	1	18.46	86.5957	2.17001	166.498
132	CC(C)(C)C1CCC(O)C(C1)C(C)(C)C	TR	-3.796	206.329	3.9872	65.5068	15	1	1	1	0	84	1	0	0	1	20.23	93.1452	3.29936	350.582
133	CC(CC1CCC(CC1)C(C)(C)C)C=O	TR	-3.7918	204.313	3.3616	64.074	15	1	0	1	3	82	1	0	0	1	17.07	92.5125	2.76813	316.187
134	N#CCN(CCN(CC#N)CC#N)CC#N	V	-2.8204	216.248	-0.31528	55.332	16	6	0	6	7	82	0	0	0	0	101.64	95.1137	4.0657	281.466
135	CC(F)F	V	-1.3147	66.05	1.2714	11.678	4	0	0	2	0	26	0	0	0	0	0	23.4353	2.32379	8.75489
136	CCC(C)(O)CCCC(C)C	TR	-2.6943	158.285	2.9737	49.6038	11	1	1	1	5	68	0	0	0	0	20.23	70.818	3.37628	95.0459
137	CC(C)(N=NC(C)(C)C#N)C#N	TR	-2.7133	164.212	2.04296	44.24	12	4	0	4	2	64	0	0	0	0	72.3	72.5258	4.50245	233.763
138	COC(=O)C1CCC(CC1)C(=O)OC	TS	-3.7969	194.186	1.2598	49.121	14	4	0	4	2	74	1	0	0	1	52.6	81.4413	2.88648	304.645
139	C[C@@H](CCO)CCC=C(C)C	TR	-2.7067	156.269	2.7513	49.5318	11	1	1	1	5	66	0	0	0	0	20.23	70.1284	3.30638	112.041
140	s1CCCC1	TR	-1.445	84.143	1.7481	24.319	5	1	0	1	0	26	1	0	0	1	0	35.0718	3.125	60.1248
141	CC(C)(C1CCC(O)CC1)C2CCC(O)CC2	TR	-2.8799	228.291	3.4237	68.3416	17	2	2	2	2	88	2	0	0	2	40.46	101.172	2.41258	447.95
142	CC(C)CCO	TR	-0.4681	88.15	1.0248	26.5408	6	1	1	1	2	38	0	0	0	0	20.23	38.9933	2.62721	25.1194
143	s1CnC2CCCCC12	TS	-1.6538	135.191	2.2963	39.62	9	2	0	2	0	44	2	0	0	2	12.89	56.9731	2.95466	282.894
144	OC(=O)C1CCCC(C1)[N+]([O-])=O	V	-1.7459	167.12	1.293	40.0557	12	3	1	5	2	62	1	0	0	1	80.44	67.4051	3.12181	304.683
145	OC(C1CCCCC1)C(=O)C2CCCCC2	TR	-2.8497	212.248	2.6029	62.1743	16	2	1	2	3	80	2	0	0	2	37.3	94.1741	2.2394	462.609
146	CCCCCCCCO	TR	-2.6376	130.231	2.3392	40.4618	9	1	1	1	6	56	0	0	0	0	20.23	58.0881	2.59508	37.8323
147	COC(=O)COC1nC(F)C(Cl)C(N)C1Cl	TR	-3.9513	269.059	1.6615	56.1384	16	5	1	8	3	88	1	0	0	1	74.44	100.246	2.93141	428.235
148	CC(C)(C)C1CCCC(C1O)C(C)(C)C	TR	-4.7136	206.329	3.9872	65.5068	15	1	1	1	0	84	1	0	0	1	20.23	93.1452	3.3689	318.332
149	CC(C1CCCCC1)C2CCCCC2	TR	-4.6925	182.266	3.8384	60.401	14	0	0	0	2	70	2	0	0	2	0	85.2184	2.29625	335.798
150	CC1CC(C)C(C(C)C1)C(=O)[P](=O)(C2CCCCC2)C3CCCCC3	TR	-5.0106	348.382	4.76616	104.742	25	2	0	3	4	126	3	0	0	3	34.14	148.456	2.27416	893.327
151	CCCCC(CC)COC(=O)C(C)=C	TR	-4.806	198.306	3.3221	59.079	14	2	0	2	7	82	0	0	0	0	26.3	87.3391	3.71466	184.761
152	CCCCC(CC)COC(=O)CS[Sn](C)(SCC(=O)OCC(CC)CCCC)SCC(=O)OCC(CC)CCCC	TR	-5.3943	743.727	9.0335	181.787	41	9	0	10	27	242	0	0	0	0	78.9	263.859	5.02396	608.421
153	OCC1CCCC(OC2CCCCC2)C1	TR	-2.8259	200.237	2.9712	58.8808	15	2	1	2	3	76	2	0	0	2	29.46	88.7612	2.1736	423.561
154	O=C1CCCCCCCCCCCN1	V	-2.8195	197.322	3.0172	59.1797	14	1	1	2	0	82	0	1	1	1	29.1	87.4592	2.14739	140.401
155	COC(=O)\C=C\C1CCCCC1	TR	-2.7343	162.188	1.8728	47.492	12	2	0	2	2	62	1	0	0	1	26.3	71.4766	2.63787	275.15
156	CSC1CC(SC)C(N)C(C)C1N	TR	-2.8569	214.359	2.60322	63.5658	13	4	2	4	2	72	1	0	0	1	52.04	87.4522	3.36172	295.631
157	C=CC1CCCCC1	TR	-2.5553	104.152	2.3296	36.533	8	0	0	0	1	40	1	0	0	1	0	49.4717	2.99105	162.653
158	ClC1CC(Cl)C(Cl)nC1Cl	TR	-3.8614	216.882	3.6952	44.277	10	1	0	5	0	54	1	0	0	1	12.89	77.8641	3.28246	209.82
159	CC(=O)OC\C=C\C1CCCCC1	TS	-2.7927	176.215	2.2629	52.109	13	2	0	2	3	68	1	0	0	1	26.3	77.8416	2.36772	288.218
160	C[C@]12CCC(=O)C=C1CC[C@H]3[C@@H]4CC[C@](O)(C(=O)CO)[C@@]4(C)C[C@H](O)[C@H]23	TR	-3.1121	362.466	1.7816	95.1424	26	5	3	5	2	144	0	3	4	4	94.83	154.031	1.73508	683.889
161	CC(C)(C)C1CCC(O)CC1	TS	-3.1033	156.269	2.5836	47.4198	11	1	1	1	0	66	0	1	1	1	20.23	69.8121	2.39362	115.325
162	[O-][N+](=O)C1CCCC(Cl)C1	TR	-2.7613	157.556	2.2482	38.1064	10	2	0	4	1	52	1	0	0	1	43.14	62.3876	3.0699	261.68
163	CC(Cl)CCl	TR	-1.6217	112.987	1.8525	26.035	5	0	0	2	1	32	0	0	0	0	0	42.0757	2.53954	18.8548
164	CCNC1CCCCC1	TR	-1.6521	121.183	2.1184	40.6057	9	1	1	1	2	48	1	0	0	1	12.03	55.7111	2.6149	157.478
165	CC(C)CCOCCC(C)C	TR	-3.7601	158.285	3.0952	49.729	11	1	0	1	6	68	0	0	0	0	9.23	71.1373	2.90921	66.942
166	CC1CCC(Cl)C(Cl)C1	TS	-3.7755	161.031	3.30182	41.199	9	0	0	2	0	48	1	0	0	1	0	64.4029	3.17168	218.156
167	NC1CCCC(O)C1	TS	-0.623	109.128	0.9744	32.5192	8	2	2	2	0	42	1	0	0	1	46.25	47.5655	3.07766	168.388
168	O=C1CCCCCCCCCCC1	V	-3.8458	182.307	3.8602	55.794	13	1	0	1	0	76	0	1	1	1	17.07	81.9093	2.14456	126.06
169	CC1CCC(N)CC1Cl	TR	-1.7531	141.601	2.23062	40.6014	9	1	1	2	0	48	1	0	0	1	26.02	59.4395	3.17168	220.156
170	CC1CCC(Cl)CC1Cl	V	-3.809	161.031	3.30182	41.199	9	0	0	2	0	48	1	0	0	1	0	64.4029	3.17168	218.156
171	OC(=O)CC1CCC(Cl)CC1Cl	TS	-2.9191	205.04	2.6205	47.8018	12	1	1	4	2	64	1	0	0	1	37.3	79.7236	2.9348	309.926
172	CC(C)(C1CCC(O)CC1)C2CCC(O)CC2.ClCC3CO3	TR	-5.0291	320.816	4.0477	88.8016	22	3	2	4	3	118	2	1	1	3	52.99	135.683	2.99e-07	539.234
173	[O-][N+](=O)C1CCC(Cl)CC1	TR	-2.8118	157.556	2.2482	38.1064	10	2	0	4	1	52	1	0	0	1	43.14	62.3876	3.0034	244.43
174	CC(C)C1CCC(C=O)CC1	TS	-2.7853	148.205	2.6225	45.9185	11	1	0	1	2	58	1	0	0	1	17.07	67.0527	2.90982	233.555
175	OC(=O)CCCCCCCC(O)=O	TR	-1.8945	188.223	1.8863	47.5906	13	2	2	4	8	76	0	0	0	0	74.6	77.5703	2.9961	146.998
176	S=C(NC1CCCCC1)NC2CCCCC2	TS	-3.9717	228.32	3.4955	72.7274	16	1	2	3	2	80	2	0	0	2	24.06	100.312	1.95219	410.374
177	C[C@]12CC[C@H]3[C@@H](CCC4=C3CCC(=O)C4)[C@@H]1CCC2=O	V	-4.055	272.388	3.8414	77.17	20	2	0	2	0	108	0	2	4	4	34.14	120.553	1.66803	515.511
178	CCCBr	TR	-1.7108	122.993	1.7913	24.085	4	0	0	1	1	26	0	0	0	0	0	35.3367	1.97474	5.24511
179	C[C@@H]1C[C@H]2[C@@H]3C[C@H](F)C4=CC(=O)C=C[C@]4(C)[C@H]3[C@@H](O)C[C@]2(C)[C@H]1C(=O)CO	TS	-3.2037	376.468	2.6367	98.4146	27	4	2	5	2	148	0	3	4	4	74.6	159.078	1.77252	742.595
180	O=C(C1CCCCC1)C2CCCCC2	TR	-3.8822	182.222	2.9176	56.3165	14	1	0	1	2	68	2	0	0	2	17.07	83.015	2.34864	376.003
181	CCC(C)C1CCCCC1	TS	-3.7586	134.222	3.2001	45.148	10	0	0	0	2	54	1	0	0	1	0	62.8912	2.74698	176.49
182	CC(C)=CCC\C(C)=C\CCC(C)(O)C=C	TR	-3.9854	222.372	4.3963	72.4768	16	1	1	1	7	92	0	0	0	0	20.23	100.574	3.87711	265.16
183	CCCCOCCOCCOC(=O)C(C)=C	TR	-2.0159	230.304	1.939	62.319	16	4	0	4	10	94	0	0	0	0	44.76	97.5662	3.09694	201.195
184	COC1CCC(N)CC1	TS	-0.748	123.155	1.2774	37.4064	9	2	1	2	1	48	1	0	0	1	35.25	54.2498	2.88156	180.613
185	CCCCCO	TR	-0.6028	88.15	1.1689	26.6108	6	1	1	1	3	38	0	0	0	0	20.23	38.9933	2.33909	15.9001
186	CC(=C)C(=O)OCC=C	TR	-1.7585	126.155	1.2917	35.97	9	2	0	2	3	50	0	0	0	0	26.3	54.8248	3.50841	135.852
187	ClC\C=C/Cl	TS	-1.7068	110.971	1.9777	25.713	5	0	0	2	1	30	0	0	0	0	0	41.3861	2.62242	31.8743
188	CCO[Si](CC(C)C)(OCC)OCC	TR	-3.0168	220.385	2.6908	60.277	14	3	0	4	8	86	0	0	0	0	27.69	89.1153	4.36813	122.309
189	S=C=S	TS	-1.5594	76.145	1.0181	20.189	3	2	0	2	0	16	0	0	0	0	0	29.4568	3.26599	23.7744
190	COC(=O)C1CCCCC1	TS	-1.8118	136.15	1.4732	37.7815	10	2	0	2	1	52	1	0	0	1	26.3	59.4364	2.85263	215.959
191	COC(=O)CCCCCCCCC(=O)OC1CC(C)(C)N(C)C(C)(C)C1.CN2C(C)(C)CC(CC2(C)C)OC(=O)CCCCCCCCC(=O)OC3CC(C)(C)N(C)C(C)(C)C3	TR	-4.6112	878.334	10.9712	250.993	62	11	0	11	21	362	0	3	3	3	114.92	379.354	4.51e-07	1288.8
192	CC(C)CC1CCC(CC1)C(C)C(O)=O	TS	-3.9922	206.285	3.0732	61.0348	15	1	1	2	4	82	1	0	0	1	37.3	90.9418	2.75904	324.894
193	CCNC1nC(NC(C)C)nC(SC)n1	TR	-3.047	227.337	1.8456	64.5304	15	6	2	6	5	84	1	0	0	1	62.73	94.5028	2.89175	315.371
194	COC1CCCC(C1)C(C)=O	TR	-1.8691	150.177	1.8978	42.9985	11	2	0	2	2	58	1	0	0	1	26.3	65.8013	3.00589	266.02
195	O=C1NC(=O)NC(=O)N1	TR	-1.8076	129.075	-2.2485	28.3041	9	3	3	6	0	48	1	0	0	1	98.58	47.5749	3.71801	276.804
196	CCC(COC(=O)C(C)=C)(COC(=O)C(C)=C)COC(=O)C(C)=C	V	-4.2262	338.4	2.7407	90.043	24	6	0	6	10	134	0	0	0	0	78.9	142.7	5.10651	469.634
197	CC1=CCC2C(C1)C2(C)C	TS	-4.6704	136.238	2.9987	43.752	10	0	0	0	0	56	0	1	2	2	0	63.3225	2.13014	186.215
198	CCC(CC1CCC(C)CC1)(N(C)C)C(=O)C2CCC(CC2)N3CCOCC3	TS	-5.1332	380.532	3.96742	115.397	28	4	0	4	7	150	2	1	1	3	32.78	168.657	1.84856	777.257
199	NC1nC(N)nC(N)n1.O=C2NC(=O)NC(=O)N2	TS	-4.9755	255.198	-3.6303	61.3683	18	9	6	12	0	96	2	0	0	2	215.31	97.3165	1.8e-07	569.204
200	CC(C)CCCC(C)CCCC(C)(O)C#C	TR	-4.9531	224.388	4.0033	71.1608	16	1	1	1	8	94	0	0	0	0	20.23	101.642	3.51698	209.965
201	CC(=C)CC(C)(C)C.N(C1CCCCC1)C2CCCCC2	V	-5.0877	281.443	6.4289	95.0527	21	1	1	1	3	112	2	0	0	2	12.03	129.274	2.4e-07	483.27
202	CC1=CCC2CC1C2(C)C.CC3(C)OC4(C)CCC3CC4.CC5(C)C6CCC(C6)C5=C.CC7(C)C8CCC7(C)C(=O)C8	TR	-5.4384	578.966	11.1432	177.267	42	2	0	2	0	238	0	7	8	8	26.3	259.839	1.12e-07	1089.92
203	CC(C)CCCCCCCCCCO	TR	-5.0008	200.366	4.1456	63.4768	14	1	1	1	10	86	0	0	0	0	20.23	89.9128	2.85192	99.4087
204	CCCCCCC(O)CCCCCCCCCCCO	TS	-5.1561	286.5	5.211	88.0216	20	2	2	2	16	122	0	0	0	0	40.46	126.532	3.07171	170.801
205	FC(F)=C(F)C(F)(F)F	TR	-2.8888	150.021	2.6263	16.405	9	0	0	6	0	54	0	0	0	0	0	45.7727	4.39952	125.729
206	CC(F)(F)Cl	TR	-1.7234	100.495	1.8379	16.474	5	0	0	3	0	32	0	0	0	0	0	33.7385	3.02372	23.1194
207	FCF	TR	-1.4374	52.023	0.8829	7.083	3	0	0	2	0	20	0	0	0	0	0	17.0703	1.63299	2.75489
208	ClC(=O)C1CCC(CC1)C(Cl)=O	TR	-4.0288	203.024	2.4446	46.809	12	2	0	4	2	62	1	0	0	1	34.14	79.0909	3.00615	283.335
209	C[C@]12CCC(=O)C=C1CC[C@@H]3[C@@H]2CC[C@@]4(C)[C@H]3C(O)CC4=O	TR	-2.2131	302.414	3.0582	83.1068	22	3	1	3	0	120	0	3	4	4	54.37	131.713	1.72655	577.229
210	ClCCCBr	TR	-1.9402	157.438	2.0102	29.131	5	0	0	2	2	32	0	0	0	0	0	45.6399	2.19061	14.3645
211	OC(O)C(Cl)(Cl)Cl	TR	1.0372	165.403	0.6673	28.5156	7	2	2	5	0	44	0	0	0	0	40.46	55.6025	3.5412	56.4455
212	OC(=O)C1CC(O)CC(C1)C(O)=O	TS	-2.0051	182.131	0.7886	42.0254	13	3	3	5	2	68	1	0	0	1	94.83	72.867	3.26341	336.547
213	OC1CCCCCCCCCCC1	TR	-3.9891	184.323	3.652	56.7938	13	1	1	1	0	78	0	1	1	1	20.23	82.542	2.10796	99.6921
214	ClCC(CCl)O[P](=O)(OC(CCl)CCl)OC(CCl)CCl	TR	-4.3767	430.907	4.6829	86.5455	20	4	0	11	12	122	0	0	0	0	44.76	148.369	4.94721	242.817
215	ClC1CCCC(Cl)C1Cl	TR	-4.0035	181.449	3.6468	41.472	9	0	0	3	0	48	1	0	0	1	0	68.3412	3.24783	199.293
216	CC(C)C1(O)CCC(=CC1)C	TR	-1.941	154.253	2.5037	47.3958	11	1	1	1	1	64	0	0	1	1	20.23	69.1225	2.63707	169.712
217	COC1CCC(OC)C(C1)[N+]([O-])=O	V	-3.0173	183.163	1.612	46.2004	13	4	0	5	3	70	1	0	0	1	61.6	75.0414	3.17553	323.92
218	CCCCNC(=O)OCC#CI	TR	-3.2033	281.093	1.9086	56.0547	12	2	1	4	4	68	0	0	0	0	38.33	86.3798	3.25472	183.232
219	CC1CC2NC(=O)NC2CC1N	V	-1.9771	163.18	0.74682	48.0688	12	2	3	4	0	62	2	0	0	2	74.67	68.4082	2.91547	438.499
220	CC(C)(C)OOC(C)(C)C	TR	-2.932	146.23	2.5316	41.676	10	2	0	2	1	62	0	0	0	0	18.46	63.4502	3.563	80.8057
221	CCOC(=O)\C=C\C1CCCCC1	V	-3.013	176.215	2.2629	52.109	13	2	0	2	3	68	1	0	0	1	26.3	77.8416	2.53821	288.218
222	O=C1NSC2CCCCC12	TR	-1.9473	151.19	1.5896	42.4457	10	2	1	3	0	50	2	0	0	2	32.86	61.2757	3.07061	400.898
223	CC1(C)C2CCC3(C2)C1C(=O)CCC3(C)C	TR	-4.0976	220.356	3.818	65.067	16	1	0	1	0	90	0	3	3	3	17.07	98.9925	2.13756	352.446
224	CCCCCCCC(C)=O	TS	-2.9303	142.242	2.9359	44.057	10	1	0	1	6	60	0	0	0	0	17.07	63.8203	2.83859	86.7291
225	CC1CCC(CC1[N+]([O-])=O)[N+]([O-])=O	TR	-3.0403	182.135	1.81142	44.4878	13	4	0	6	2	68	1	0	0	1	86.28	73.1023	3.26705	374.755
226	OCCCNC1CCC(O)CC1[N+]([O-])=O	TS	-2.1106	212.205	1.0947	54.9537	15	5	3	6	5	82	1	0	0	1	95.63	86.3175	2.81201	353.966
227	CC1CCCCC1C	TS	-2.8192	106.168	2.30344	35.916	8	0	0	0	0	42	1	0	0	1	0	50.1613	3.13486	156.148
228	CC1CCC(C)CC1	TR	-2.8192	106.168	2.30344	35.916	8	0	0	0	0	42	1	0	0	1	0	50.1613	3.03246	138.898
229	CC(C)C(=O)OCCC1CCCCC1	TR	-3.0798	192.258	2.4283	55.943	14	2	0	2	4	76	1	0	0	1	26.3	84.8961	2.25751	277.633
230	CC(=O)/C=C/C1=C(C)CCCC1(C)C	TS	-3.0799	192.302	3.6582	60.153	14	1	0	1	2	78	0	0	1	1	17.07	86.895	2.96128	292.357
231	CCCCCCCCCCN(C)C	TS	-4.0453	185.355	3.6887	61.164	13	1	0	1	9	80	0	0	0	0	3.24	84.5134	2.83541	89.1253
232	CCCCCCC(C)(C)S	TS	-3.9902	160.326	3.6652	51.824	10	1	1	1	5	62	0	0	0	0	0	70.8139	3.04376	71.2877
233	CCCS[P](=O)(OCC)OC1CCC(Br)CC1Cl	TR	-4.3656	373.636	5.7691	81.7615	18	4	0	7	7	102	1	0	0	1	35.53	124.989	2.851	444.297
234	CCCCCCCCC(C)C=O	TR	-4.0271	170.296	3.572	53.221	12	1	0	1	8	72	0	0	0	0	17.07	76.5502	2.94795	99.1772
235	CC1CCC(C)C(O)C1C	V	-1.9355	136.194	2.31746	42.3178	10	1	1	1	0	54	1	0	0	1	20.23	61.3205	3.34215	224.15
236	CC1CCCC(C)C1	V	-2.8329	106.168	2.30344	35.916	8	0	0	0	0	42	1	0	0	1	0	50.1613	3.07766	159.898
237	O=[Si]=O	/	-3.6027	60.084	-0.6184	7.127	3	2	0	3	0	16	0	0	0	0	34.14	19.4022	3.26599	23.7744
238	CC1CCCC(C1C)[N+]([O-])=O	TR	-3.0034	151.165	2.21164	42.5704	11	2	0	3	1	58	1	0	0	1	43.14	64.8143	3.27358	294.144
239	O=C(CC1CCCCC1)OCCC2CCCCC2	TR	-4.1887	240.302	3.015	71.251	18	2	0	2	5	92	2	0	0	2	26.3	107.223	1.72578	476.965
240	C=CCOC(=O)C1CCCCC1C(=O)OCC=C	TR	-3.2211	246.262	2.3722	67.401	18	4	0	4	6	94	1	0	0	1	52.6	105.522	2.90771	419.617
241	CC1CC(O)CC(C)(C)C1	TR	-1.9917	142.242	2.1935	42.8028	10	1	1	1	0	60	0	1	1	1	20.23	63.4472	2.50994	105.897
242	CN(C)C1CCCCC1	V	-1.9221	121.183	1.7526	40.769	9	1	0	1	1	48	1	0	0	1	3.24	55.9211	2.84823	167.182
243	O=C/C=C/C1CCCCC1	TR	-1.9688	132.162	1.8987	41.54	10	1	0	1	2	50	1	0	0	1	17.07	59.9981	2.75877	223.743
244	CC(=O)NC1CCC(O)CC1	TS	-1.0333	151.165	1.3506	42.4105	11	2	2	3	1	58	1	0	0	1	49.33	64.6669	2.7363	253.299
245	CCCCCCCCCO	TR	-3.013	144.258	2.7293	45.0788	10	1	1	1	7	62	0	0	0	0	20.23	64.453	2.6476	44.69
246	O=C1CCCCCCCCCCCC(=O)OCCO1	TR	-4.2617	270.369	3.3775	72.705	19	4	0	4	0	110	0	1	1	1	52.6	115.393	2.21624	236.871
247	OC1CC(Cl)CCC1OC2CCC(Cl)CC2	TR	-4.2394	255.1	4.4913	64.6428	16	2	1	4	2	82	2	0	0	2	29.46	103.003	2.23382	494.872
248	NC1nC(N)nC(NC2nC(N)nC(N)n2)n1	TR	-4.2253	235.215	-1.871	60.5863	17	11	5	11	2	88	2	0	0	2	193.45	94.7158	2.3052	461.653
249	CC1CCCCC1	TR	-3.8459	98.189	2.5866	32.249	7	0	0	0	0	42	0	1	1	1	0	45.9231	2.12292	42
250	COC(=O)OC	TR	0.1853	90.078	0.3992	19.414	6	3	0	3	0	36	0	0	0	0	35.53	35.8577	2.98816	44
251	CC(=C)C(=O)OC1CCCCC1	TR	-3.0886	168.236	2.4384	47.779	12	2	0	2	2	68	0	1	1	1	26.3	73.6034	2.29101	178.278
252	CCCC(=O)OCC1CCCCC1	TR	-3.1174	178.231	2.5299	51.146	13	2	0	2	4	70	1	0	0	1	26.3	78.5312	2.31004	254.053
253	OC(=O)C1CC(CC(C1)[N+]([O-])=O)[N+]([O-])=O	TR	-2.2076	212.117	1.2012	46.7101	15	5	1	8	3	78	1	0	0	1	123.58	82.0581	3.38738	375.787
254	NNC(N)=S	TR	-0.8458	91.139	-1.3067	24.1085	5	2	3	4	0	30	0	0	0	0	64.07	35.2978	2.84738	42.1577
255	CCC(=O)/C=C/C1=C(C)CCCC1(C)C	V	-4.1875	206.329	4.0483	64.77	15	1	0	1	3	84	0	0	1	1	17.07	93.26	2.89776	305.3
256	ClC1CCCC(Cl)C1	V	-3.0722	147.004	2.9934	36.462	8	0	0	2	0	42	1	0	0	1	0	58.0379	3.07766	166.388
257	CCC(=O)C1CCCCC1	TR	-2.0485	134.178	2.2793	41.0635	10	1	0	1	2	52	1	0	0	1	17.07	60.6878	2.85263	213.43
258	CC(C)(C)C1CCC(C=O)CC1	TR	-3.131	162.232	2.7966	50.5295	12	1	0	1	1	64	1	0	0	1	17.07	73.4176	2.99884	264.051
259	S=C1NC2CCCCC2S1	V	-3.1515	167.258	2.95889	47.0097	10	2	1	3	0	50	2	0	0	2	15.79	67.3319	3.00762	362.898
260	CC(=C)C1CCCCC1	TR	-3.0081	118.179	2.7197	41.15	9	0	0	0	1	46	1	0	0	1	0	55.8366	2.98145	196.538
261	COC1CC(CC=C)CCC1O	TS	-2.1532	164.204	2.1293	48.5598	12	2	1	2	3	64	1	0	0	1	29.46	72.1093	2.95956	279.167
262	CC1C(C)(C)C2=C(C(=O)CCC2)C1(C)C	V	-3.2653	206.329	3.7381	62.61	15	1	0	1	0	84	0	0	2	2	17.07	92.9438	2.59667	344.35
263	CC(C)(C1CCC(OCCO)CC1)C2CCC(OCCO)CC2	TR	-3.4518	316.397	2.7547	90.1736	23	4	2	4	8	124	2	0	0	2	58.92	136.859	2.1293	534.272
264	C[C@@H]1O[C@@H](O[C@@H]2[C@@H](O)[C@H](O)[C@@H](CO)O[C@H]2OC3CC(O)C4C(=O)C[C@H](OC4C3)C5CCC(O)CC5)[C@H](O)[C@H](O)[C@H]1O	TR	-2.7224	580.539	-1.1652	134.147	41	14	8	14	6	224	2	2	3	5	225.06	233.028	1.41069	1237.26
265	CC(C)COC(=O)C1CCCCC1C(=O)OCC(C)C	TR	-4.3839	278.348	3.3122	76.683	20	4	0	4	6	110	1	0	0	1	52.6	119.631	2.81593	420.3
266	CC(CCNC(=O)OCCOC(=O)C(C)=C)CC(C)(C)CNC(=O)OCCOC(=O)C(C)=C	TR	-4.6199	470.563	3.1199	122.426	33	8	2	10	15	188	0	0	0	0	129.26	195.589	3.96211	702.575
267	CC1CCCC(C)C1C.C2CC3CCCCC3C2.C4C=CC5CCCCC45	TR	-3.5162	354.537	7.04306	118.3	27	0	0	0	0	138	3	0	2	5	0	164.14	1.17e-07	863.312
268	OC1CCC(CC1)C(=O)OCC2CCCCC2	TR	-3.325	228.247	2.7492	63.6683	17	3	1	3	3	86	2	0	0	2	46.53	99.2877	1.95941	488.636
269	CC(=O)/C=C/C1C(=CCCC1(C)C)C	V	-3.2587	192.302	3.5141	60.083	14	1	0	1	2	78	0	0	1	1	17.07	86.895	2.86229	281.611
270	CCOC=O	TR	0.1515	74.079	0.1793	17.69	5	2	0	2	2	30	0	0	0	0	26.3	30.7442	2.40172	26.074
271	CCOC1CCC2NC(C)(C)C=C(C)C2C1	TR	-3.3328	217.312	3.6927	68.9637	16	2	1	2	2	86	1	0	1	2	21.26	97.3189	2.41527	432.362
272	CCCCCCCCC=O	TS	-3.1487	142.242	2.9359	44.057	10	1	0	1	7	60	0	0	0	0	17.07	63.8203	2.70379	69.1285
273	OCCCCO	TR	1.0452	90.122	-0.2488	23.4056	6	2	2	2	3	38	0	0	0	0	40.46	37.4225	2.33909	17.5098
274	OCC(O)CO	TS	1.0358	92.094	-1.6681	20.1784	6	3	3	3	2	38	0	0	0	0	60.69	35.8518	2.75418	25.2193
275	OC(=O)C1CC(CCC1O)[N+]([O-])=O	TS	-2.2627	183.119	0.9986	41.7205	13	4	2	6	2	68	1	0	0	1	100.67	72.1993	3.26705	373.146
276	OC1CC(Cl)CCC1OC2CCC(Cl)CC2Cl	TR	-4.4617	289.545	5.1447	69.6528	17	2	1	5	2	88	2	0	0	2	29.46	113.306	2.31224	505.942
277	CCCCCCCCCCCCO	V	-4.9847	186.339	3.8996	58.9298	13	1	1	1	10	80	0	0	0	0	20.23	83.5478	2.75815	71.1937
278	CC1(C)CCC[C@@]2(C)[C@H]1CC[C@@]3(C)OCC[C@H]23	TR	-5.0995	236.399	4.408	70.927	17	1	0	1	0	98	0	3	3	3	9.23	106.309	1.97734	317.487
279	CC(C)(C)NSC1sC2CCCCC2n1	TR	-5.1367	238.381	3.6915	68.3657	15	4	1	4	2	80	2	0	0	2	24.92	98.2412	2.15627	423.801
280	CCCCC(CC)C(=O)OCCOCCOCCOC(=O)C(CC)CCCC	TR	-5.4202	402.572		110.168	28	6	0	6	19	166	0	0	0	0	71.06	171.18	3.56705	349.223
281	CC(=C)C1CCC(CC1)C(=O)C(C)(C)O.CC(C)(O)C(=O)C2CCC(CC2)C3(C)CC(C)(C)C4CC(CCC34)C(=O)C(C)(C)O.CC(C)(O)C(=O)C5CCC(CC5)C6(C)CC(C)(C)C7CCC(CC67)C(=O)C(C)(C)O	TR	-5.8273	1021.35	11.8355	298.253	75	10	5	10	13	400	5	0	2	7	186.5	444.522	2.2e-07	3007.62
282	COC1CCC(CC1)C(=O)CSC2CCCC(OC)C2	TS	-5.2847	288.368	3.6788	81.0425	20	4	0	4	6	104	2	0	0	2	35.53	122.46	1.96519	578.531
283	CC(C)(COC(=O)C1CCCCC1)COC(=O)C2CCCCC2	TS	-5.4228	312.365	3.7266	87.23	23	4	0	4	6	120	2	0	0	2	52.6	135.593	1.82363	590.085
284	[nH]1C2CCCCC2C3CCCCC13	TR	-5.2104	167.211	3.3211	55.8047	13	0	1	1	0	62	3	0	0	3	15.79	76.0039	2.64244	512.884
285	O=C(OC1CCCCC1)C2CCCCC2C(=O)OC3CCCCC3	TR	-5.5126	330.424	4.6656	91.019	24	4	0	4	4	130	1	2	2	3	52.6	143.079	1.66579	517.757
286	O=C(OCCC1CCCCC1)/C=C/C2CCCCC2	TR	-5.4019	252.313	3.4857	76.581	19	2	0	2	5	96	2	0	0	2	26.3	112.899	1.74679	529.703
287	CCCCC(CC1CC(C(O)C(C1)C(C)(C)C)C(C)(C)C)(C(=O)OC2CC(C)(C)N(C)C(C)(C)C2)C(=O)OC3CC(C)(C)N(C)C(C)(C)C3	TR	-5.8357	685.047	9.0955	201.239	49	7	1	7	9	280	1	2	2	3	79.31	299.422	2.1999	1232.76
288	FC1CCCCC1C(=O)C2CC(Cl)CCC2NC(=O)CBr	TR	-5.5693	370.605	4.0435	83.7082	21	2	1	6	4	108	2	0	0	2	46.17	133.793	2.4683	705.823
289	CC1CC(C(O)C(C1)C(C)(C)C)C(C)(C)C	TR	-5.4623	220.356	4.29562	70.2438	16	1	1	1	0	90	1	0	0	1	20.23	99.5101	3.50785	353.872
290	O=C1CCCCCCCCCC\C=C/CCC1	TR	-5.5607	236.399	5.1966	74.168	17	1	0	1	0	98	0	0	1	1	17.07	106.679	2.18774	217.565
291	CC1CCC(CC1)C(C)C	TR	-5.3546	140.27	3.4687	45.96	10	0	0	0	1	60	0	1	1	1	0	65.0179	2.2599	86.2114
292	CCCCCC(C)OC(=O)COC1CCC(Cl)C2CCCnC12	TS	-5.748	335.831	4.779	91.944	23	4	0	5	8	124	2	0	0	2	48.42	141.309	1.90883	659.757
293	CC(C)C1CCC(CC1)C2CCCCC2	TR	-5.6099	196.293	4.477	65.967	15	0	0	0	2	76	2	0	0	2	0	91.5833	2.32125	409.551
294	CC(=C)C(=O)OCCC(F)(F)C(F)(F)C(F)(F)C(F)(F)C(F)(F)C(F)(F)F	TR	-6.0582	432.176	5.2346	61.18	27	2	0	15	8	160	0	0	0	0	26.3	141.491	5.80475	576.334
295	CCCCCCCCCCCCCCO	TR	-5.7871	214.393	4.6798	68.1638	15	1	1	1	12	92	0	0	0	0	20.23	96.2777	2.80793	89.5118
296	CC(C)C1CCC(O[P](=O)(OC2CCC(CC2)C(C)C)OC3CCC(CC3)C(C)C)CC1	TR	-6.1371	452.531	8.7017	131.083	32	4	0	5	9	170	3	0	0	3	44.76	191.72	1.8665	899.821
297	C1CCC(CC1)NSC2sC3CCCCC3n2	TR	-5.9171	264.419	4.2257	75.4857	17	4	1	4	3	90	2	1	1	3	24.92	109.965	1.6372	455.88
298	CCCCCCCCCCCCCCCC1CCCC(O)C1.CCCCCCC\C=C/CCCCCCC2CCCC(O)C2.CCCC/C=C\C\C=C/CCCCCCC3CCCC(O)C3.OC4CCCC(CCCCCC\C=C/C/C=C\CCC=C)C4	TR	-6.597	1205.98	26.7596	389.459	88	4	4	4	51	492	4	0	0	4	80.92	542.556	5.87e-07	2280.01
299	CCCC[C@H](CC)COC(=O)/C=C/C1CCC(OC)CC1.CCCC[C@@H](CC)COC(=O)/C=C/C2CCC(OC)CC2	TR	-6.4216	580.806	8.936	172.586	42	6	0	6	18	232	2	0	0	2	71.06	253.651	4.2e-07	954.063
300	CCCCCCCCCCCCC1CO1	TR	-5.9847	212.377	4.6962	66.201	15	1	0	1	11	90	0	1	1	1	12.53	95.5912	1.61826	129.3
301	CC(C)CCCCCCCOP(OCCCCCCCC(C)C)OC1CCCCC1	TR	-6.382	438.633	9.3187	130.974	30	3	0	4	20	174	1	0	0	1	27.69	187.831	2.16787	454.427
302	O[S](O)(=O)=O.O=[Ti]	/	-5.9614	161.945	-0.7741	14.8639	7	3	2	7	0	42	0	0	0	0	91.67	52.0281	0	102.042
303	COC(=O)C1CCC2CC(CCC2C1)C(=O)OC	V	-6.2117	244.246	2.413	66.627	18	4	0	4	2	92	2	0	0	2	52.6	104.123	2.48059	560.97
304	OC1CCC(O)C2C(=O)C3CCCCC3C(=O)C12	TR	-6.2535	240.214	1.8732	63.0786	18	4	2	4	0	88	2	0	1	3	74.6	102.124	2.40942	640.935
305	CC(C)C1CCC2CCCCC2C1C(C)C	TR	-6.2301	212.336	5.0866	72.126	16	0	0	0	2	84	2	0	0	2	0	98.3027	2.78929	492.365
306	CCCCCCCC[Sn](=O)CCCCCCCC	TR	-6.4785	361.158	6.1294	82.8065	18	1	0	2	14	108	0	0	0	0	17.07	122.244	3.12462	161.936
307	CC1CC(C)(C)CC(C1)(OOC(C)(C)C)OOC(C)(C)C	TR	-6.4807	302.455	5.0223	83.373	21	4	0	4	4	126	0	1	1	1	36.92	129.885	2.8724	317.68
308	C\C1=C/CCC(=C)[C@H]2CC(C)(C)[C@@H]2CC1	TS	-6.3373	204.357	4.7252	66.743	15	0	0	0	0	84	0	1	2	2	0	94.4576	2.11962	293.16
309	C(OC1CCC2CCCCC2C1)C3CCCCC3	V	-6.4777	234.298	4.4188	74.722	18	1	0	1	3	88	3	0	0	3	9.23	106.649	1.78738	643.836
310	C1CC=CC(C1)C2CCC(CC2)C3CCC=CC3	TR	-6.5919	238.374	5.334	77.906	18	0	0	0	2	94	1	0	2	3	0	110.42	1.73611	435.611
311	C[Si]1(C)O[Si](C)(C)O[Si](C)(C)O[Si](C)(C)O1	TR	-6.9537	296.62	2.8736	74.268	16	4	0	8	0	96	0	1	1	1	36.92	103.253	2.97706	205.212
312	COCCCN1C(=O)C2C(N)C3C(=O)C4CCCCC4C(=O)C3C(N)C2C1=O	TR	-7.3238	379.372	0.465	109.72	28	8	2	8	4	142	4	0	0	4	134.48	156.795	2.24753	1370.54
313	CCCCC(CC)COC(=O)C1CCC(NC2nC(NC3CCC(CC3)C(=O)OCC(CC)CCCC)nC(NC4CCC(CC4)C(=O)OCC(CC)CCCC)n2)CC1	TR	-8.2165	823.092	12.222	239.767	60	12	3	12	27	324	4	0	0	4	153.66	356.59	1.48575	1657.31
314	CCN(CCOC1CCC(CC1)C2CCCCC2)C3CCC(C=C(C#N)C#N)C(C)C3	TR	-8.3861	413.565	6.37858	126.032	31	4	0	4	8	160	2	1	1	3	60.05	185.926	1.56591	957.022
315	[O-][N+](=O)N1CN(CN(CN(C1)[N+]([O-])=O)[N+]([O-])=O)[N+]([O-])=O	TR	-4.8251	296.156	-2.1952	54.8016	20	8	0	16	4	112	0	1	1	1	185.52	108.36	3.01898	352.193
316	CO[S](C)(=O)=O	TR	-0.0419	110.134	-0.4076	21.8528	6	3	0	4	1	38	0	0	0	0	43.37	37.0521	3.85062	110.755
317	CC(C)(C1CCC(OCC2CO2)CC1)C3CCC(OCC4CO4)CC3	V	-4.7996	340.419	3.5677	95.482	25	4	0	4	8	132	2	2	2	4	43.52	148.215	1.41241	636.181
318	CCCCCCCCCCCCN(C)C	TR	-4.4261	213.409	4.4689	70.398	15	1	0	1	11	92	0	0	0	0	3.24	97.2433	2.86681	109.906
319	ClC1CCC(OC2CCCC(Cl)C2)CC1	TR	-5.3874	239.101	4.7857	62.978	15	1	0	3	2	76	2	0	0	2	9.23	98.2086	2.18177	451.434
320	CC(=O)C(\C)=C/C1C(=CCCC1(C)C)C	V	-3.9923	206.329	3.9042	64.7	15	1	0	1	2	84	0	0	1	1	17.07	93.26	3.0004	318.23
321	CC(=O)CC(=O)NC1CCC(NC(=O)CC(C)=O)CC1	TR	-3.1275	276.292	1.5218	74.2974	20	4	2	6	6	106	1	0	0	1	92.34	116.097	2.55723	485.61
322	CC[Pb](CC)(CC)CC	TR	-5.4129	323.448	3.5148	47.678	9	0	0	1	4	56	0	0	0	0	0	64.6931	3.82468	47.4581
323	C1CCC(CC1)P(C2CCCCC2)C3CCCCC3	TS	-6.2013	262.292	3.4448	85.148	19	0	0	1	3	92	3	0	0	3	0	115.045	2.12101	523.714
324	CCCCCCCC\C=C/CCCCCCCC1=NCCN1CCO	TR	-3.8458	350.591	5.7303	110.413	25	3	1	3	17	146	0	0	1	1	35.83	156.157	1.81891	351.936
325	CCOCCCCCCCCCCCCCC\C=C\CC	TR	-4.8	296.539	7.0604	95.945	21	1	0	1	17	126	0	0	0	0	9.23	134.097	2.94602	198.015
326	CCCC(C)C.CCCC(C)CC.CCC(C)CC.CCC(C)C(C)C	TR	-3.2704	372.766	10.4061	128.148	26	0	0	0	9	164	0	0	0	0	0	170.88	-1.24e-07	200.084
327	CC\C=C\C	TR	-2.5449	70.135	1.9725	25.105	5	0	0	0	1	30	0	0	0	0	0	33.5094	2.62242	27.0196
328	CCOC(=O)C(C)OC(=O)C1CC(OC2CCC(CC2Cl)C(F)(F)F)CCC1[N+]([O-])=O	TR	-6.623	461.776	5.1677	101.135	31	7	0	12	7	166	2	0	0	2	104.97	178.16	2.32233	1010.48
329	CCC=C.C\C=C\C	TR	-4.6698	112.216	3.1648	40.976	8	0	0	0	1	48	0	0	0	0	0	52.9205	0	47.0587
330	CCCCCCCCC(O)=O.CCCCCCC(O)=O.CCCCC(O)=O.OCC(CO)(CO)CO	TS	-5.4184	526.708	4.0662	139.961	36	7	7	10	19	218	0	0	0	0	192.82	216.924	-1.92e-07	461.836
331	S=C1NC2CCCCC2N1	TR	-2.1767	150.206	2.22549	43.4834	10	1	2	3	0	50	2	0	0	2	31.58	62.9007	3.00762	362.898
332	CCCCN(C1CC(C)(C)N(C)C(C)(C)C1)C2nC(NCCCN(CCN(CCCNC3nC(nC(n3)N(CCCC)C4CC(C)(C)N(C)C(C)(C)C4)N(CCCC)C5CC(C)(C)N(C)C(C)(C)C5)C6nC(nC(n6)N(CCCC)C7CC(C)(C)N(C)C(C)(C)C7)N(CCCC)C8CC(C)(C)N(C)C(C)(C)C8)C9nC(nC(n9)N(CCCC)C%10CC(C)(C)N(C)C(C)(C)C%10)N(CCCC)C%11CC(C)(C)N(C)C(C)(C)C%11)nC(n2)N(CCCC)C%12CC(C)(C)N(C)C(C)(C)C%12	TR	-5.359	2285.68	25.8072	699.523	164	32	2	32	55	938	4	8	8	12	237.06	1003.76	1.11684	4609.94
333	CCCCC[C@H](CCC)CCCO	TR	-5.1564	186.339	3.7555	58.8598	13	1	1	1	9	80	0	0	0	0	20.23	83.5478	3.41128	91.1253
334	CC(C)(C)OOC1(CCCCC1)OOC(C)(C)C	V	-5.3862	260.374	4.1402	69.662	18	4	0	4	4	108	0	1	1	1	36.92	110.79	2.5743	223.5
335	CC1=CC(C)(C)NC2CCCCC12	TR	-5.2387	173.259	3.294	57.7947	13	1	1	1	0	68	1	0	1	2	12.03	79.4755	2.54975	361.142
336	CCCCCCCCCl	TR	-5.1722	148.677	3.5857	44.096	9	0	0	1	6	56	0	0	0	0	0	63.5971	2.59508	37.8323
337	CC1CCC(O)C(C1)n2nC3CCCCC3n2	V	-5.3527	225.251	2.43452	65.2668	17	4	1	4	1	84	3	0	0	3	50.94	98.1247	2.23157	654.947
338	CC1CC(CCC(=O)OCCOCCOCCOC(=O)CCC2CC(C)C(O)C(C2)C(C)(C)C)CC(C1O)C(C)(C)C	TR	-5.7685	586.766	5.99464	163.286	42	8	2	8	15	234	2	0	0	2	111.52	250.883	1.52995	1093.99
339	CCCCCCC\C=C\CC	TR	-5.1884	154.297	4.3131	52.807	11	0	0	0	7	66	0	0	0	0	0	71.6991	2.84525	82.0391
340	CC(C)CCCCCCOC(=O)CCCCC(=O)OCCCCCCC(C)C	TS	-6.6006	398.628	6.8462	116.232	28	4	0	4	19	166	0	0	0	0	52.6	173.683	3.34384	340.801
341	CCCCCCCCCCCC(=O)OOC(=O)CCCCCCCCCCC	V	-6.6006	398.628	7.8296	115.872	28	4	0	4	20	166	0	0	0	0	52.6	173.612	3.3171	320.514
342	CC(C)(C1CCCCC1)C2CC(n3nC4CCCCC4n3)C(O)C(C2)C(C)(C)C5CCCCC5	TS	-7.0488	447.582	6.7779	137.67	34	4	1	4	5	170	5	0	0	5	50.94	200.064	1.77661	1417.98
343	CCCCCCCCCCCCCCCCCCNC(=O)CCCCCCCCCCC\C=C/CCCCCCCC	TR	-7.7709	590.078	13.962	190.476	42	1	1	2	36	250	0	0	0	0	29.1	265.994	3.17515	527.732
344	CCCCCCCCCCCCCCCCCCNC(=O)CCCCCCCCCCCCCCCCC	V	-7.7292	535.986	12.6256	172.102	38	1	1	2	33	228	0	0	0	0	29.1	241.224	3.1372	435.058
345	CC1COC2CCCCC2N1C(=O)C(Cl)Cl	TR	-3.8354	260.12	2.6042	64.379	16	2	0	5	1	86	1	0	1	2	29.54	103.892	2.40498	408.726
346	NC1CCC(CC1)C#N	TR	-1.143	118.139	1.14048	35.5694	9	2	1	2	0	44	1	0	0	1	49.81	53.5288	3.05604	230.088
347	O=C1OCCO1	TS	0.9462	88.062	0.1532	17.3	6	3	0	3	0	34	0	1	1	1	35.53	34.8519	2.36735	60.4386
348	OC(=O)CC(=C)C(O)=O	TS	-0.225	130.099	0.1019	29.0286	9	2	2	4	3	50	0	0	0	0	74.6	51.4209	3.78843	158.341
349	CC(C)COC(=O)[C@@H](C)O	V	-0.4129	146.186	0.5664	37.4778	10	3	1	3	3	60	0	0	0	0	46.53	60.9982	3.40375	107.419
350	NC(=O)NC1NC(=O)NC1=O	TS	-1.5088	158.117	-2.1798	33.1815	11	3	4	7	1	60	0	1	1	1	113.32	61.3023	2.53444	225.377
351	NC(=O)C[NH+](CC([O-])=O)CC([O-])=O	TR	-1.7636	189.147	-6.1436	34.7721	13	5	2	7	6	74	0	0	0	0	127.79	73.7367	4.096	189.025
352	OC(=O)CCSCCC(O)=O	TR	-0.7991	178.209	0.669	41.8306	11	3	2	5	6	64	0	0	0	0	74.6	68.5986	3.02561	129.518
353	CCCCN[P](N)(N)=S	TR	-0.773	167.218	0.518	45.5705	9	1	3	5	4	56	0	0	0	0	64.07	61.3523	3.18177	110.38
354	CC1CCC(O)CC1	TR	-0.7015	108.14	1.70062	32.8438	8	1	1	1	0	42	1	0	0	1	20.23	48.5906	3.03246	143.247
355	CCNC(=S)OC(C)C	TS	-1.7448	147.243	1.3058	42.4957	9	2	1	3	2	54	0	0	0	0	21.26	61.5861	3.27119	93.0587
356	OCC(CO)(CBr)CBr	TR	-1.1304	261.941	0.7472	44.1926	9	2	2	4	4	56	0	0	0	0	40.46	71.5226	3.82468	55.8485
357	CC(N)C(O)=O	V	0.2679	89.094	-0.5818	21.2852	6	2	2	3	1	36	0	0	0	0	63.32	35.7648	3.25759	59.8135
358	ON=C1CCCCC1	TR	-0.8496	113.16	1.7807	32.3065	8	2	1	2	0	46	0	1	1	1	32.59	49.2017	2.33188	90.7017
359	OC(=O)C1CCCN1	V	1.1291	115.132	-0.177	28.6605	8	2	2	3	1	46	0	1	1	1	49.33	47.6988	2.34994	96.6018
360	N#CCCC#N	TR	0.1752	80.09	0.81376	20.46	6	2	0	2	1	30	0	0	0	0	47.58	36.6192	2.78354	79.0962
361	CC1CCCC(C1C)[S](O)(=O)=O	TR	0.778	186.232	1.55014	45.7306	12	2	1	4	1	66	1	0	0	1	54.37	71.7899	3.46848	392.764
362	CC1C(N)CCCC1Cl	TR	-2.1511	141.601	2.23062	40.6014	9	1	1	2	0	48	1	0	0	1	26.02	59.4395	3.24783	199.906
363	CC(CC=O)CC(C)(C)C	V	-2.6759	142.242	2.6477	43.917	10	1	0	1	3	60	0	0	0	0	17.07	63.8203	3.56439	99.7861
364	ClC1CCCCC1Cl	TR	-3.0534	147.004	2.9934	36.462	8	0	0	2	0	42	1	0	0	1	0	58.0379	3.13486	162.638
365	CC(C)CCCC(C)CCCC(C)CCCCC(C)CCCC(C)CCCC(C)C	TR	-5.149	422.826	11.0844	140.204	30	0	0	0	21	182	0	0	0	0	0	193.323	3.53656	307.947
366	CC(=C)C(O)=O	TS	0.0563	86.09	0.6471	22.4498	6	1	1	2	1	34	0	0	0	0	37.3	36.1002	3.5677	71.5489
367	OCCNCCO	TR	0.9578	105.137	-1.4394	27.0413	7	3	3	3	4	44	0	0	0	0	52.49	42.9724	2.44747	28.8708
368	COCCOCCOC	TR	0.8455	134.175	0.2958	34.571	9	3	0	3	6	56	0	0	0	0	27.69	55.9046	2.59508	41.5676
369	C/C=C/C(O)=O	TR	0.0382	86.09	0.6471	22.4498	6	1	1	2	1	34	0	0	0	0	37.3	36.1002	3.30163	73.6173
370	CC1CCC(N)CC1	TS	-1.0477	107.156	1.57722	35.5914	8	1	1	1	0	42	1	0	0	1	26.02	49.1362	3.03246	143.247
371	COC1CC(C=O)CCC1O	TS	-1.228	152.149	1.2133	40.0463	11	3	1	3	2	58	1	0	0	1	46.53	64.2306	3.11616	268.04
372	BrCBr	TS	-1.2859	173.835	1.7337	22.721	3	0	0	2	0	20	0	0	0	0	0	36.4743	1.63299	2.75489
373	CC(O)CNCC(C)O	TR	0.815	133.191	-0.6624	36.2313	9	3	3	3	4	56	0	0	0	0	52.49	55.7023	2.91466	56.0782
374	CCC1CO1	TS	0.0805	72.107	0.7952	20.031	5	1	0	1	1	30	0	1	1	1	12.53	31.9418	1.99894	30.6292
375	O=C1CCCCC1	TR	-0.0574	98.145	1.5196	28.092	7	1	0	1	0	40	0	1	1	1	17.07	43.7197	2.24954	68.2492
376	CCOC(C)=O	TR	-0.0254	88.106	0.5694	22.307	6	2	0	2	1	36	0	0	0	0	26.3	37.1091	2.83126	49.5098
377	O=C1CCCCCN1	TR	0.8601	113.16	0.6766	31.4777	8	1	1	2	0	46	0	1	1	1	29.1	49.2695	2.2667	80.5293
378	C=CCNCC=C	TR	-0.079	97.161	0.948	33.2637	7	1	1	1	4	40	0	0	0	0	12.03	44.7346	2.67955	49.2004
379	CI	TR	-1.2146	141.939	1.0512	19.944	2	0	0	1	0	14	0	0	0	0	0	28.0011	1	2
380	O=C1OC(=O)C2CC3C(=O)OC(=O)C3CC12	TR	-1.4062	218.12	-0.5046	53.438	16	6	0	6	0	78	3	0	0	3	94.56	85.0295	2.79864	769.652
381	CC1CCC2C(C1)C(=O)OC2=O	V	-1.3015	168.192	1.1222	41.094	12	3	0	3	0	66	0	2	2	2	43.37	71.0837	2.16934	233.928
382	CC1CCCC(C)C1N	V	-1.1675	121.183	1.88564	40.3284	9	1	1	1	0	48	1	0	0	1	26.02	55.5012	3.24783	195.558
383	CN1C(=O)N(C)C2nC[nH]C2C1=O	TR	-1.3526	180.167	-1.0397	46.5757	13	5	1	6	0	68	2	0	0	2	72.68	72.454	3.21185	574.171
384	CN(C)CC1CCCCC1	TR	-1.2279	135.21	1.7482	43.833	10	1	0	1	2	54	1	0	0	1	3.24	62.2861	2.58729	179.18
385	ClC(Cl)Cl	V	-1.1738	119.378	1.9864	21.347	4	0	0	3	0	26	0	0	0	0	0	39.649	2.32379	8
386	CCOC1=C(O)C(=O)O[C@@H]1[C@@H](O)CO	V	0.581	204.178	-0.9289	44.2534	14	6	3	6	4	80	0	0	1	1	96.22	80.3697	2.83907	258.557
387	COC(=O)\C=C/C(=O)OC	V	-0.2672	144.126	-0.1114	33.172	10	4	0	4	2	56	0	0	0	0	52.6	58.4245	3.7526	141.131
388	CN	V	1.3686	31.058	-0.4251	10.1114	2	1	1	1	0	14	0	0	0	0	26.02	14.0791	1	2
389	[nH]1CnCn1	TR	1.0058	69.067	-0.1953	16.3827	5	2	1	3	0	26	1	0	0	1	41.57	29.0483	3.125	61.3699
390	OC1CCC(O)CC1	TR	-0.1967	110.112	1.0978	29.7716	8	2	2	2	0	42	1	0	0	1	40.46	47.0199	3.03246	145.388
391	NC(CC(O)=O)C(O)=O	TS	-1.2293	133.103	-1.127	27.864	9	3	3	5	3	52	0	0	0	0	100.62	51.0855	3.63243	132.529
392	CCN(C(C)C)C(C)C	TR	-1.2416	129.247	2.1251	42.652	9	1	0	1	3	56	0	0	0	0	3.24	59.0537	3.67762	58.9679
393	CC(C)OC(=O)C(F)(F)F	TS	-1.3361	156.103	1.5003	27.283	10	2	0	5	1	60	0	0	0	0	26.3	55.9707	3.86728	127.345
394	OC=O	TR	1.1759	46.025	-0.2992	8.6928	3	1	1	2	0	18	0	0	0	0	37.3	17.695	2.1875	10.2647
395	CCCCO	TR	-0.0504	74.123	0.7788	21.9938	5	1	1	1	2	32	0	0	0	0	20.23	32.6283	2.19061	11.1194
396	NCCCCCCN	TR	0.7389	116.208	0.4642	36.5768	8	2	2	2	5	50	0	0	0	0	52.04	51.2437	2.53006	31.5098
397	[nH]1CCnC1	TS	0.9684	68.079	0.4097	18.5877	5	1	1	2	0	26	1	0	0	1	28.68	29.8602	3.125	61.3699
398	OCC(CO)(CO)CO	TR	-0.3416	136.147	-2.058	30.7762	9	4	4	4	4	56	0	0	0	0	80.92	53.376	3.82468	51.8485
399	OCCOCCOCCCNC1CCC(NCCCOCCOCCO)C2C(=O)C3CCCCC3C(=O)C12	TR	0.0572	530.618	2.117	143.41	38	10	4	10	20	208	2	0	1	3	135.58	222.787	1.59569	949.908
400	CC(O)=O	TS	1.0017	60.052	0.0909	13.3098	4	1	1	2	0	24	0	0	0	0	37.3	24.0599	2.80304	27.0196
401	CC(=C)C=O	TS	-0.0675	70.091	0.7614	20.878	5	1	0	1	1	28	0	0	0	0	17.07	31.306	3.20481	54.6683
402	CC(C)C=O	V	-0.0798	72.107	0.8413	20.902	5	1	0	1	1	30	0	0	0	0	17.07	31.9956	2.82575	30.6292
403	OC(=O)CC1(CCCCC1)CC(O)=O	TS	-1.4722	200.234	1.8863	50.0236	14	2	2	4	4	80	0	1	1	1	74.6	82.9294	2.65688	210.276
404	O=CC1CCCCC1	V	-1.2096	106.124	1.4991	31.8295	8	1	0	1	1	40	1	0	0	1	17.07	47.9579	2.99105	167.002
405	O=C1OC(=O)C2CCCCC12	V	-1.3644	148.117	0.9972	36.188	11	3	0	3	0	54	1	0	1	2	43.37	62.592	2.69468	307.945
406	Cl\C=C\Cl	TS	-1.1872	96.944	1.9352	20.846	4	0	0	2	0	24	0	0	0	0	0	35.0211	2.54919	19.2193
407	C1CCC2nCCCC2C1	V	-1.3251	129.162	2.2348	41.743	10	1	0	1	0	48	2	0	0	2	12.89	59.3327	2.88805	275.705
408	CC1CCC(N)C(C1)[S](O)(=O)=O	TR	-1.4942	187.22	0.82392	45.406	12	3	2	5	1	66	1	0	0	1	80.39	70.7649	3.43449	397.113
409	O=C1NCCN1	TR	0.8403	86.094	-0.7008	21.4014	6	1	2	3	0	34	0	1	1	1	41.13	35.7246	2.36735	63.1934
410	CC(=O)OCC(COC(C)=O)OC(C)=O	V	-0.5754	218.205	0.0443	48.82	15	6	0	6	5	86	0	0	0	0	78.9	87.484	3.99221	228.987
411	OC(=O)CC(O)(CC(O)=O)C(O)=O	TR	0.4768	192.123	-1.2485	37.0912	13	4	4	7	5	74	0	0	0	0	132.13	72.2255	4.61931	227.367
412	NC1[nH]nCn1	TR	0.8327	84.082	-0.6131	20.7951	6	3	2	4	0	32	1	0	0	1	67.59	34.3882	3.04965	109.109
413	OCCN1C(=O)N(CCO)C(=O)N(CCO)C1=O	TR	0.3404	261.234	-3.8514	60.4794	18	9	3	9	6	102	1	0	0	1	126.69	100.777	3.59113	457.865
414	OC1COC(O)C(O)C1O	V	0.5779	150.13	-2.5823	29.9792	10	5	4	5	0	60	0	1	1	1	90.15	57.4837	2.51584	102.606
415	CN=C(NCC1CCOC1)N[N+]([O-])=O	V	-0.5694	202.214	-0.6204	50.4178	14	4	2	7	3	80	0	1	1	1	88.79	81.6548	2.23014	224.975
416	CCOCCC(=O)OCC	TR	-0.4317	146.186	0.9761	37.743	10	3	0	3	5	60	0	0	0	0	35.53	61.3175	3.05238	90.852
417	COC(=O)CC#N	TS	-0.2636	99.089	0.07308	22.246	7	3	0	3	1	38	0	0	0	0	50.09	41.5017	3.22938	102.748
418	CCOC(=O)CC#N	V	-0.3276	113.116	0.46318	26.863	8	3	0	3	2	44	0	0	0	0	50.09	47.8667	3.22569	114.087
419	CN(C)CCOC(=O)C(C)=C	TR	0.5025	157.213	0.6673	44.327	11	3	0	3	4	64	0	0	0	0	29.54	67.6391	3.39722	152.171
420	OC(=O)C1CCC(=O)N1	V	-0.4043	129.115	-0.6504	28.8005	9	2	2	4	1	50	0	1	1	1	66.4	51.8603	2.4809	154.282
421	CCCC=O	TR	-0.159	72.107	0.9854	20.972	5	1	0	1	2	30	0	0	0	0	17.07	31.9956	2.40172	24.8289
422	NC1CCCCC1Cl	TS	-1.3576	127.574	1.9222	35.8644	8	1	1	2	0	42	1	0	0	1	26.02	53.0746	3.13486	164.638
423	C/C=C/CCC1CCCC(=O)O1	TR	-1.4887	168.236	2.4384	47.779	12	2	0	2	3	68	0	1	1	1	26.3	73.6034	2.17988	172.677
424	CC1CCCCC1[S](N)(=O)=O	TR	-1.526	171.221	0.64242	42.5522	11	2	1	4	1	60	1	0	0	1	60.16	65.897	3.37219	356.458
425	NC1CCCC(C1)C(F)(F)F	V	-1.5082	161.126	2.2876	35.8564	11	1	1	4	0	60	1	0	0	1	26.02	61.6328	3.0599	254.108
426	NC1CCC(CC1)CC2CCC(N)CC2	TR	-1.624	210.365	2.4115	64.4838	15	2	2	2	2	88	0	2	2	2	52.04	93.7867	1.68123	156.975
427	OB(O)O	/	-0.0993	61.833	-2.0518	12.4104	4	3	3	4	0	24	0	0	0	0	60.69	23.6845	2.32379	8
428	CC(C)CC(O)=O	TR	-0.3279	102.133	1.1171	27.0908	7	1	1	2	2	42	0	0	0	0	37.3	43.1548	3.12601	66.4804
429	OCCN(CCO)C1CCCCC1	V	-0.5834	181.235	0.4776	52.8266	13	3	2	3	5	72	1	0	0	1	43.7	78.2395	2.63892	219.626
430	OC1CCCCC1O	TR	0.6123	110.112	1.0978	29.7716	8	2	2	2	0	42	1	0	0	1	40.46	47.0199	3.13486	162.638
431	CCN(O)CC	V	0.7036	89.138	0.7174	24.7075	6	2	1	2	2	38	0	0	0	0	23.47	38.3422	2.75418	26.7291
432	CN(C)CCCNCCCN(C)C	V	0.3559	187.331	0.4794	59.2117	13	3	1	3	8	80	0	0	0	0	18.51	83.0933	2.91636	90.343
433	N[C@@H](CCC(N)=O)C(O)=O	TR	-0.5483	146.146	-1.3362	34.0396	10	3	3	5	4	58	0	0	0	0	106.41	57.9961	3.49073	145.828
434	CC[C@H](C)[C@H](N)C(O)=O	TR	-0.503	131.175	0.4444	35.0662	9	2	2	3	3	54	0	0	0	0	63.32	54.8596	3.71614	103.231
435	O=C1OC(=O)C=C1	TR	0.6181	98.057	-0.374	20.239	7	3	0	3	0	36	0	0	1	1	43.37	39.5752	2.75954	129.014
436	CC(N)C1CCCCC1	TR	-0.4814	121.183	1.7063	39.0444	9	1	1	1	1	48	1	0	0	1	26.02	55.5012	2.84823	167.182
437	CC1(C)CC(=O)CC(C)(C1)C#N	TR	-1.5405	165.236	2.29548	46.359	12	2	0	2	0	66	0	1	1	1	40.86	73.572	2.85536	249.054
438	CCCCCCCCN.CCCCO[P](S)(=O)OCCCC	TR	-1.8797	355.525	5.9633	100.743	22	4	2	6	14	136	0	0	0	0	61.55	143.153	0	235.545
439	CC(C)C1=NN(C(=O)NC(C)(C)C)C(=O)N1N	TR	-1.7188	241.295	0.2382	64.4091	17	6	2	7	1	96	1	0	0	1	94.94	99.5707	3.12371	477.866
440	NC1CC(Cl)nC(C(O)=O)C1Cl	TR	-0.0043	207.016	1.6688	45.6287	12	3	2	6	1	64	1	0	0	1	76.21	77.9182	3.37386	340.565
441	OC1CCC(Cl)CC1Cl	TR	-1.559	163.003	2.699	38.1268	9	1	1	3	0	48	1	0	0	1	20.23	62.8322	3.17168	222.298
442	CCCCCC(C)=O	TS	-1.4333	114.188	2.1557	34.823	8	1	0	1	4	48	0	0	0	0	17.07	51.0904	2.82235	66.7871
443	CCCC(C)C=O	TS	-1.3774	100.161	1.6215	30.136	7	1	0	1	3	42	0	0	0	0	17.07	44.7255	2.98436	50.1417
444	CCCCNCCCC	TR	-1.504	129.247	2.1762	42.6857	9	1	1	1	6	56	0	0	0	0	12.03	58.8437	2.59508	37.8323
445	CC1CC(N)CCC1N	TS	-0.5072	122.171	1.15942	40.0038	9	2	2	2	0	48	1	0	0	1	52.04	54.4761	3.17168	218.156
446	CCCNCCC	TS	-0.4611	101.193	1.396	33.4517	7	1	1	1	4	44	0	0	0	0	12.03	46.1138	2.44747	23.361
447	NC1CCCCC1	TR	-0.425	93.129	1.2688	30.8544	7	1	1	1	0	36	1	0	0	1	26.02	42.7713	3.02147	134.107
448	CC(=O)C1CCOC1=O	TR	0.3975	128.127	0.1385	29.747	9	3	0	3	1	50	0	1	1	1	43.37	52.9947	2.5976	150.382
449	CC(C)C(O)C(C)(C)CO	V	-0.6667	146.23	1.0218	41.7116	10	2	2	2	3	62	0	0	0	0	40.46	62.8823	4.03412	97.4307
450	COC=O	V	0.6986	60.052	-0.2108	13.073	4	2	0	2	1	24	0	0	0	0	26.3	24.3793	2.29684	18
451	CCOCCOC(C)(C)C	TR	-0.6879	146.23	1.838	42.198	10	2	0	2	4	62	0	0	0	0	18.46	63.5209	3.04376	73.817
452	COC(C)CCOC(C)=O	TS	-0.6878	146.186	0.9745	37.721	10	3	0	3	4	60	0	0	0	0	35.53	61.3175	3.11047	101.024
453	NC1nC(N)nC(N)n1.O[P](O)(O)=O	TR	-1.7594	224.117	-2.3104	47.3271	14	7	6	11	0	80	1	0	0	1	194.49	78.0482	2.92e-07	292.187
454	CC1CC(CCC1N)CC2CCC(N)C(C)C2	TR	-1.821	238.419	2.9035	73.5778	17	2	2	2	2	100	0	2	2	2	52.04	106.517	1.77547	217.076
455	CC1CCC(C)C(O)C1	V	-1.5376	122.167	2.00904	37.5808	9	1	1	1	0	48	1	0	0	1	20.23	54.9555	3.17168	215.808
456	NC1nCnC2n(CnC12)C3OC(CO[P](O)(O)=O)C(O)C3O	TR	-1.9953	347.224	-1.863	73.6551	23	10	5	13	4	126	2	1	1	3	186.07	128.304	1.85115	763.138
457	ClCC(Cl)Cl	V	-1.5811	133.405	2.0289	26.214	5	0	0	3	1	32	0	0	0	0	0	46.014	2.53954	18.8548
458	NC1nC(N)nC(N)n1	V	-1.5592	126.123	-1.3818	33.0642	9	6	3	6	0	48	1	0	0	1	116.73	51.11	3.16567	169.065
459	NC(N)=N[N+]([O-])=O	V	-1.4858	104.069	-1.5485	22.8042	7	2	2	6	1	40	0	0	0	0	107.54	38.9375	3.67923	102.257
460	NN=C(N)N.OC(O)=O	TR	-1.6154	136.111	-1.6441	30.6508	9	3	5	7	0	54	0	0	0	0	147.95	50.7451	0	102.38
461	CC(C)OC(C)C	TR	-1.5166	102.177	1.8198	31.357	7	1	0	1	2	44	0	0	0	0	9.23	45.6775	2.95322	33.4447
462	CC(C)Br	V	-1.5985	122.993	1.7897	24.063	4	0	0	1	0	26	0	0	0	0	0	35.3367	2.32379	8
463	CCSCC	V	-1.468	90.191	1.7594	28.673	5	1	0	1	2	32	0	0	0	0	0	37.9572	2.19061	11.1194
464	CCCCOCCOCCOCCCC	TR	-1.862	218.337	2.6364	62.273	15	3	0	3	12	92	0	0	0	0	27.69	94.0942	2.80793	95.0404
465	NC1CCC(Cl)CC1	TR	-1.6286	127.574	1.9222	35.8644	8	1	1	2	0	42	1	0	0	1	26.02	53.0746	3.03246	147.388
466	FC(F)Cl	TS	-1.4597	86.468	1.4478	11.857	4	0	0	3	0	26	0	0	0	0	0	27.3736	2.32379	10.7549
467	OCC#CCO	TS	1.5363	86.09	-1.0256	21.9476	6	2	2	2	0	34	0	0	0	0	40.46	36.4218	2.89867	59.3526
468	OC(=O)CCC(N(CC(O)=O)CC(O)=O)C(O)=O	TR	0.0436	263.202	-1.2244	55.1382	18	5	4	9	9	102	0	0	0	0	152.44	101.242	4.82857	336.477
469	CC(C)(C)C(O)=O	TR	-0.5636	102.133	1.1171	27.0908	7	1	1	2	0	42	0	0	0	0	37.3	43.1548	3.79112	78.5712
470	OCC(Br)(CO)[N+]([O-])=O	TR	0.1271	199.988	-0.6611	32.824	9	4	2	6	3	54	0	0	0	0	83.6	59.5781	4.09034	112.38
471	C1CCOCOC1	V	0.4108	102.133	0.7709	26.005	7	2	0	2	0	42	0	1	1	1	18.46	43.4203	2.04167	25.6933
472	CC(C)=CC(C)=O	TS	-0.5608	98.145	1.5416	30.112	7	1	0	1	1	40	0	0	0	0	17.07	44.0359	3.67923	96.7476
473	OC1CCC(Cl)CC1	TS	-0.6877	128.558	2.0456	33.1168	8	1	1	2	0	42	1	0	0	1	20.23	52.5289	3.03246	147.388
474	CC(=C)C#N	V	-0.4067	67.091	1.08608	20.427	5	1	0	1	0	26	0	0	0	0	23.79	31.5371	3.3488	76.139
475	CC1CCCCC1O	TR	-0.619	108.14	1.70062	32.8438	8	1	1	1	0	42	1	0	0	1	20.23	48.5906	3.13486	160.497
476	OCCOC1CCCCC1	TS	-0.7425	138.166	1.0577	39.0228	10	2	1	2	3	54	1	0	0	1	29.46	60.0691	2.42652	171.872
477	CC(=O)NNC(C)=O	TS	0.3287	116.12	-0.8264	27.6334	8	2	2	4	0	46	0	0	0	0	58.2	47.227	3.18185	96.6059
478	CN(C)CCOC(=O)C=C	TR	0.2243	143.186	0.2772	39.71	10	3	0	3	4	58	0	0	0	0	29.54	61.2742	3.19487	120.775
479	CC1COC(=O)O1	TR	0.3712	102.089	0.5417	21.895	7	3	0	3	0	40	0	1	1	1	35.53	41.2169	2.39707	88.9357
480	NC1CCCCC1.C=O	/	-2.0041	123.155	1.0839	37.9754	9	2	1	2	0	48	1	0	0	1	43.09	54.3036	2.91e-07	150.262
481	OC(=O)C1CCC2C(=O)OC(=O)C2C1	TR	-0.8962	192.126	0.6954	43.1473	14	4	1	5	1	70	1	0	1	2	80.67	77.9127	2.60762	460.27
482	CC(C)(CO)COC(=O)C(C)(C)CO	TR	0.0682	204.266	0.5666	52.6926	14	4	2	4	5	84	0	0	0	0	66.76	84.8873	4.09844	196.299
483	CCCC(C)O	TS	-0.2541	88.15	1.1673	26.5888	6	1	1	1	2	38	0	0	0	0	20.23	38.9933	2.62721	25.1194
484	CC1CCCC(O)C1	TR	-0.6629	108.14	1.70062	32.8438	8	1	1	1	0	42	1	0	0	1	20.23	48.5906	3.07766	164.247
485	CS	TS	-0.3149	48.11	0.546	14.91	2	1	1	1	0	14	0	0	0	0	0	19.8943	1	2
486	OC1CCCCC1Cl	TR	-0.7538	128.558	2.0456	33.1168	8	1	1	2	0	42	1	0	0	1	20.23	52.5289	3.13486	164.638
487	C1OCOCO1	TR	0.3717	90.078	-0.0777	17.856	6	3	0	3	0	36	0	1	1	1	27.69	35.8039	2	21.5098
488	CCC(CO)(CO)COCC(CC)(CO)CO	TR	-1.0763	250.335	-0.235	64.6102	17	5	4	5	10	104	0	0	0	0	90.15	103.044	4.2763	150.806
489	C=CC=O	TR	0.5694	56.064	0.3713	16.261	4	1	0	1	1	22	0	0	0	0	17.07	24.9411	2.73205	24.2647
490	CC(=C)C(N)=O	TR	0.3754	85.106	0.0478	24.0084	6	1	1	2	1	34	0	0	0	0	43.09	36.6459	3.5677	73.5489
491	OCCC1CCCCC1	TR	-0.7859	122.167	1.2214	37.2318	9	1	1	1	2	48	1	0	0	1	20.23	54.9555	2.6149	157.478
492	OC1CCCCC1C#N	TR	-0.775	119.123	1.26388	32.8218	9	2	1	2	0	44	1	0	0	1	44.02	52.9832	3.19933	249.338
493	OC(=O)C1CCCCC1	TS	-1.6199	122.123	1.3848	33.4013	9	1	1	2	1	46	1	0	0	1	37.3	52.7521	2.98145	203.416
494	OC1=CC(=O)NC=N1	TR	-1.5872	112.088	-0.5245	26.5225	8	3	2	4	0	42	1	0	0	1	65.98	44.8265	3.27742	229.48
495	CC(=O)CC(=O)NC1CCCCC1C	TR	-1.8502	191.23	1.91262	55.1067	14	2	1	3	3	74	1	0	0	1	46.17	83.129	2.64963	358.06
496	CC(C)C(NC(N)=O)NC(N)=O	TR	-1.8097	174.204	-0.6949	44.0642	12	2	4	6	3	70	0	0	0	0	110.24	70.6665	4.0397	164.387
497	CC(C)(O)C1CCCC(C1)C(C)(C)O	TR	-1.8635	194.274	2.1414	56.9316	14	2	2	2	2	78	1	0	0	1	40.46	85.2095	3.14816	286.579
498	CCC1CCCC(C)C1N	TS	-1.7061	135.21	2.13962	44.9694	10	1	1	1	1	54	1	0	0	1	26.02	61.8661	3.14304	228.17
499	ClC(Cl)=C	TR	-1.5886	96.944	1.9352	20.846	4	0	0	2	0	24	0	0	0	0	0	35.0211	2.80304	27.0196
500	SC1CCCCC1Cl	TS	-1.78	144.626	2.6287	38.704	8	1	1	2	0	42	1	0	0	1	0	58.8897	3.13486	164.638
501	OCCCCCCC=C	TS	-1.7442	128.215	2.1152	40.3678	9	1	1	1	6	54	0	0	0	0	20.23	57.3985	2.66388	59.588
502	CC1CCC(C=O)CC1	V	-1.7237	120.151	1.80752	36.5665	9	1	0	1	1	46	1	0	0	1	17.07	54.3228	3.00978	198.313
503	OC1CCCCC1[N+]([O-])=O	V	-1.8029	139.11	1.3004	34.7612	10	3	1	4	1	52	1	0	0	1	63.37	56.8786	3.15294	258.925
504	CC1=NN(C(=O)C1)C2CCCCC2	TR	-1.9251	174.203	1.7992	51.654	13	2	0	3	1	66	1	0	1	2	32.67	76.6722	2.32624	356.447
505	CCCCCCC=O	TR	-1.7501	114.188	2.1557	34.823	8	1	0	1	5	48	0	0	0	0	17.07	51.0904	2.61629	50.3485
506	CC(C)(C)OC(=O)C=C	TS	-1.8046	128.171	1.5141	36.042	9	2	0	2	1	52	0	0	0	0	26.3	55.5144	3.73639	119.368
507	CC(C)COC(=O)C=C	TS	-1.8068	128.171	1.3716	35.994	9	2	0	2	3	52	0	0	0	0	26.3	55.5144	3.2725	105.484
508	CC1CC(O)CCC1N	TR	-1.7894	123.155	1.28282	37.2562	9	2	2	2	0	48	1	0	0	1	46.25	53.9305	3.17168	220.156
509	CC1C(O)CCCC1O	TR	0.1928	124.139	1.40622	34.5086	9	2	2	2	0	48	1	0	0	1	40.46	53.3848	3.24783	197.906
510	CC(C)(O)C=C	V	0.3511	86.134	0.9433	26.4948	6	1	1	1	1	36	0	0	0	0	20.23	38.3037	3.44599	49.449
511	COC1CC(NC2C(CnC3CC(OCCCN4CCN(C)CC4)C(OC)CC23)C#N)C(Cl)CC1Cl	TR	-4.8796	530.456	5.19038	143.356	36	8	1	10	9	190	3	1	1	4	82.88	220.808	1.57081	1272.89
512	CCC(OCCCOC)OC(C)=O	TR	-0.0168	190.239	1.3387	48.29	13	4	0	4	7	78	0	0	0	0	44.76	79.1609	3.41829	135.576
513	CCOC1CCC(N)CC1	TR	-0.8608	137.182	1.6675	42.0234	10	2	1	2	2	54	1	0	0	1	35.25	60.6147	2.6938	192.917
514	CC(=O)OCCOC(C)=O	TS	0.0685	146.142	0.1126	33.266	10	4	0	4	3	58	0	0	0	0	52.6	59.1141	3.05509	113.71
515	CCCCO[P](O)(=O)OCCCC	TR	-1.0873	210.21	2.7202	51.5453	13	3	1	5	8	80	0	0	0	0	55.76	79.8648	3.48511	146.223
516	COC=C	V	-0.531	58.08	0.7763	17.206	4	1	0	1	1	24	0	0	0	0	9.23	25.8931	2.29684	17.2451
517	CCOC(=O)C(Cl)C(C)=O	TR	-0.9859	164.588	0.7459	36.955	10	3	0	4	3	58	0	0	0	0	43.37	64.3038	3.82319	143.928
518	COCC(C)OC(C)=O	TR	0.083	132.159	0.5844	33.104	9	3	0	3	3	54	0	0	0	0	35.53	54.9526	3.25923	90.3038
519	CC\C=C/CCO	V	-0.7859	100.161	1.335	31.1338	7	1	1	1	3	42	0	0	0	0	20.23	44.6686	2.77715	48.1417
520	NC(N)=N.SC#N	TR	1.1065	118.165	-0.76415	30.7005	7	3	4	5	0	40	0	0	0	0	99.68	47.0228	0	78.1808
521	CC(C)C(N1CCCNC1=O)C(O)=O	TS	-1.1029	200.238	0.5109	50.9835	14	2	2	5	3	80	0	1	1	1	69.64	83.0799	2.75399	240.212
522	CC(O)COC1CCCCC1	V	-1.0034	152.193	1.4462	43.6178	11	2	1	2	3	60	1	0	0	1	29.46	66.434	2.39229	193.978
523	CN(CC(O)=O)C(N)=N	TR	-0.9387	131.135	-1.10373	32.1799	9	2	3	5	2	52	0	0	0	0	90.41	52.5749	3.63243	133.774
524	CC(C)CC=O	TS	-0.7591	86.134	1.2314	25.519	6	1	0	1	2	36	0	0	0	0	17.07	38.3605	2.81414	39.2031
525	OC(C(O)=O)C1CCCCC1	TR	-0.0321	152.149	0.8046	39.0376	11	2	2	3	2	58	1	0	0	1	57.53	63.9113	2.85118	242.774
526	CC(C)CC(C)=O	TS	-0.8515	100.161	1.6215	30.136	7	1	0	1	2	42	0	0	0	0	17.07	44.7255	3.12601	64.5803
527	COC1CCCCC1N	TR	-0.9443	123.155	1.2774	37.4064	9	2	1	2	1	48	1	0	0	1	35.25	54.2498	3.00652	197.863
528	C=CCOCC1CO1	V	0.0498	114.144	0.5878	30.756	8	2	0	2	4	46	0	1	1	1	21.76	49.0956	1.80359	76.5977
529	COC(=O)CCC(=O)OC	TS	-0.0752	146.142	0.1126	33.266	10	4	0	4	3	58	0	0	0	0	52.6	59.1141	3.35292	113.71
530	OC1CCC(CC1O)C#N	TR	-1.0235	135.122	0.96948	34.4866	10	3	2	3	0	50	1	0	0	1	64.25	57.7774	3.20012	288.148
531	NC1CCC(CC1)[S](O)(=O)=O	TR	-1.1413	173.193	0.5155	40.669	11	3	2	5	1	60	1	0	0	1	80.39	64.3999	3.20152	340.595
532	CC1=CC(=O)CC(C)(C)C1	V	-1.0614	138.21	2.3218	41.779	10	1	0	1	0	56	0	0	1	1	17.07	62.1249	2.79815	186.905
533	CC1CCCC(N)C1	TS	-0.9508	107.156	1.57722	35.5914	8	1	1	1	0	42	1	0	0	1	26.02	49.1362	3.07766	164.247
534	CCC(C)(C)O	TR	0.1267	88.15	1.1673	26.5888	6	1	1	1	1	38	0	0	0	0	20.23	38.9933	3.16849	33.6933
535	NC(N)=S	V	0.1885	76.124	-0.8113	20.9728	4	1	2	3	0	24	0	0	0	0	52.04	29.7778	2.80304	29.0196
536	OC1CCCC(O)C1	TS	1.0035	110.112	1.0978	29.7716	8	2	2	2	0	42	1	0	0	1	40.46	47.0199	3.07766	166.388
537	O=C1CC(=O)NC(=O)N1	V	-1.0487	128.087	-1.2575	26.2984	9	3	2	5	0	48	0	1	1	1	75.27	50.4125	2.63663	140.968
538	COC1OC(CO)C(O)C(O)C1O	TR	0.7452	194.183	-2.5673	40.7762	13	6	4	6	2	78	0	1	1	1	99.38	75.3271	2.65939	143.062
539	C[N+]([O-])=O	TS	0.2335	61.04	-0.1071	12.9184	4	2	0	3	0	24	0	0	0	0	43.14	23.3922	2.80304	29.0196
540	CCC(C)(O)C#C	TS	0.0167	98.145	0.7806	29.7478	7	1	1	1	1	40	0	0	0	0	20.23	44.3574	3.65579	86.8434
541	OC1CCC(CC1)[S](O)(=O)=O	TR	0.759	174.177	0.6389	37.9214	11	3	2	5	1	60	1	0	0	1	74.6	63.8543	3.20152	337.35
542	CN(C)C(C)=O	TR	1.0599	87.122	0.0945	24.368	6	1	0	2	0	36	0	0	0	0	20.31	37.7554	3.25759	58.5684
543	NC1CCCC(C1)[S](O)(=O)=O	TS	-1.2051	173.193	0.5155	40.669	11	3	2	5	1	60	1	0	0	1	80.39	64.3999	3.27791	357.845
544	CCC(C)(C)OC	TS	-0.9796	102.177	1.8214	31.379	7	1	0	1	2	44	0	0	0	0	9.23	45.6775	3.36044	42.1417
545	NC1CC(Cl)C(Cl)CC1[S](O)(=O)=O	TR	-2.1052	242.083	1.8223	50.689	13	3	2	7	1	72	1	0	0	1	80.39	85.0065	3.50155	443.438
546	C1CCCCC1	TS	-1.6423	78.114	1.6866	26.442	6	0	0	0	0	30	1	0	0	1	0	37.4314	3	71.961
547	CCCCOC(=O)C=C	V	-1.8773	128.171	1.5157	36.064	9	2	0	2	4	52	0	0	0	0	26.3	55.5144	3.0655	97.0893
548	CCCCOCC1CCC(O)C(OC)C1	TS	-2.0949	210.273	2.7175	59.2228	15	3	1	3	6	84	1	0	0	1	38.69	90.6424	2.47136	296.919
549	CCN(CC)C1CCCC(O)C1	TS	-2.0113	165.236	2.2384	51.6678	12	2	1	2	3	66	1	0	0	1	23.47	73.4452	2.8536	243.349
550	[O-][N+](=O)OCC(CO[N+]([O-])=O)O[N+]([O-])=O	TR	-2.1521	227.085	-1.0201	37.7602	15	9	0	12	8	86	0	0	0	0	157.11	80.6308	3.99221	234.987
551	COC(=O)C=C1CCCC1	V	-1.9426	140.182	1.6598	38.567	10	2	0	2	1	56	0	1	1	1	26.3	60.8735	2.44518	150.641
552	NCC(F)F	TR	0.5225	81.065	0.2102	15.0584	5	1	1	3	1	32	0	0	0	0	26.02	28.7752	2.53954	21.6096
553	CC(=O)OCC1OC(OC(C)=O)C(OC(C)=O)C(OC(C)=O)C1OC(C)=O	TR	-2.4154	390.341	-0.3674	83.722	27	11	0	11	6	152	0	1	1	1	140.73	154.696	3.28548	599.174
554	C1OC1C2CCCCC2	TR	-1.9065	120.151	1.7579	35.135	9	1	0	1	1	46	1	1	1	2	12.53	54.269	2.28607	188.982
555	ClC1CCCCC1C=O	V	-1.9806	140.569	2.1525	36.8395	9	1	0	2	1	46	1	0	0	1	17.07	58.2611	3.14798	219.911
556	OC(=O)C1CC(CC(C1)[N+]([O-])=O)C(O)=O	TS	-2.1784	211.129	0.9912	47.015	15	4	2	7	3	78	1	0	0	1	117.74	82.7258	3.38738	373.438
557	OC1CCCC2CCCCC12	TR	-2.062	144.173	2.5454	45.6128	11	1	1	1	0	54	2	0	0	2	20.23	64.9073	2.91316	374.034
558	CC\C=C/CCOC(C)=O	TS	-2.1115	142.198	1.9058	40.681	10	2	0	2	4	58	0	0	0	0	26.3	61.8793	3.04763	116.426
559	ClCC(Cl)C=C	TR	-2.0555	124.998	2.0186	30.558	6	0	0	2	2	36	0	0	0	0	0	47.751	2.9649	42.8127
560	CCCCCCCCN1CCCC1=O	TR	-2.2577	197.322	2.9693	59.19	14	1	0	2	7	82	0	1	1	1	20.31	87.6691	1.90468	167.705
561	CC(C)(C)C1CCCCC1O	TS	-2.19	150.221	2.6897	46.8068	11	1	1	1	0	60	1	0	0	1	20.23	67.6854	3.14111	245.295
562	CCC(C)Cl	TR	-2.0013	92.569	2.0237	25.606	5	0	0	1	1	32	0	0	0	0	0	38.1373	2.53954	17.6096
563	CCCCC(CC)CO	TS	-2.1605	130.231	2.1951	40.3918	9	1	1	1	5	56	0	0	0	0	20.23	58.0881	3.09225	48.5293
564	CC\C(C)=C\CCC(C)=O	TR	-2.1926	140.226	2.7119	43.963	10	1	0	1	4	58	0	0	0	0	17.07	63.1307	3.4278	133.664
565	CC(=O)CC(=O)NC1CCCCC1Cl	V	-2.4065	211.648	2.2576	55.3797	14	2	1	4	3	74	1	0	0	1	46.17	87.0673	2.64963	362.895
566	NC1CCCC2CCCC(N)C12	TR	-2.3071	158.204	2.0042	52.7728	12	2	2	2	0	60	2	0	0	2	52.04	70.7928	2.96094	384.358
567	CCC\C=C(/CC)C=O	TR	-2.256	126.199	2.3218	39.346	9	1	0	1	4	52	0	0	0	0	17.07	56.7658	3.60818	103.135
568	CCCCC(CC)C=O	TR	-2.2628	128.215	2.4017	39.37	9	1	0	1	5	54	0	0	0	0	17.07	57.4554	3.19541	68.9679
569	CC(C)(C)C1CCC(O)CC1	V	-2.3914	150.221	2.6897	46.8068	11	1	1	1	0	60	1	0	0	1	20.23	67.6854	2.99375	228.045
570	NC1CCC(Cl)C(Cl)C1	TR	-2.4461	162.019	2.5756	40.8744	9	1	1	3	0	48	1	0	0	1	26.02	63.3778	3.17168	222.298
571	OC1CCCCC1C2CCCCC2	TR	-2.5067	170.211	3.0592	53.5428	13	1	1	1	1	64	2	0	0	2	20.23	77.2827	2.53607	392.879
572	OC(=O)CN(CCN(CC(O)=O)CC(O)=O)CC(O)=O	TR	-2.7668	292.244	-2.0712	63.4232	20	6	4	10	11	114	0	0	0	0	155.68	113.366	4.49438	315.454
573	COC1CCC2nCCC([C@H](O)[C@H]3C[C@@H]4CCN3C[C@@H]4C=C)C2C1	TR	-2.8121	324.424	3.1732	95.0268	24	4	1	4	4	126	2	3	3	5	45.59	142.313	1.68709	760.387
574	CC(C)COC(=O)[C@H](C)Cl	V	-2.5175	164.632	1.8129	41.112	10	2	0	3	3	60	0	0	0	0	26.3	66.5072	3.40375	110.174
575	CC(=C)C(=O)OC(C)(C)C	V	-2.4864	142.198	1.9042	40.659	10	2	0	2	1	58	0	0	0	0	26.3	61.8793	3.93242	151.131
576	CCCCOC=C	TS	-2.3379	100.161	1.9466	31.057	7	1	0	1	4	42	0	0	0	0	9.23	44.9879	2.55878	41.4447
577	[O-][N+](=O)C1CCCCC1Cl	TS	-2.564	157.556	2.2482	38.1064	10	2	0	4	1	52	1	0	0	1	43.14	62.3876	3.15294	261.68
578	BrC1CCCCC1	TR	-2.5686	157.01	2.4491	34.142	7	0	0	1	0	36	1	0	0	1	0	51.299	3.02147	134.107
579	CC1CCC(CC1)[N+]([O-])=O	TR	-2.5149	137.138	1.90322	37.8334	10	2	0	3	1	52	1	0	0	1	43.14	58.4493	3.0034	240.288
580	CC=C(C)C	TS	-2.2332	70.135	1.9725	25.105	5	0	0	0	0	30	0	0	0	0	0	33.5094	3.1432	38
581	CCCCOC(=O)C(C)=C	TR	-2.5444	142.198	1.9058	40.681	10	2	0	2	4	58	0	0	0	0	26.3	61.8793	3.31247	127.219
582	ClC1CCCCC1	TS	-2.4493	112.559	2.34	31.452	7	0	0	1	0	36	1	0	0	1	0	47.7347	3.02147	134.107
583	C=COCCCCOC=C	TS	-2.6477	142.198	2.0868	41.532	10	2	0	2	7	58	0	0	0	0	18.46	62.1417	2.76214	77.2584
584	CCC1CCC(CC)CC1.CC(C)C2CCCCC2.CC3CCCCC3.CC4CC(C)CC(C)C4.C5CCC6CCCCC6C5.C7CC8CCCCC8C7.C9C=CC%10CCCCC9%10.C%11CCCCC%11.C%12CCC%13CCCCC%13C%12	/	-3.5397	1039.59	21.7513	348.682	79	0	0	0	3	406	10	0	3	13	0	478.573	1.64e-07	2956.28
585	CCCCC.CCC1CCCCC1.CC2CCCCC2.CC3CCCC(C)C3.C4CCCC4	TR	-3.173	446.763	10.6945	151.199	33	0	0	0	3	182	3	1	1	4	0	206.037	3.94e-07	727.452
586	O[S](=O)(=O)C1CCC2nC([nH]C2C1)C3CCCCC3	TS	-2.9611	274.301	2.4766	71.3443	19	3	2	6	2	96	3	0	0	3	83.05	109.228	2.1693	838.711
587	CC1CCCCC1.C=CC2CCCCC2.C3CCCCC3	TR	-2.9613	274.407	6.01122	94.154	21	0	0	0	1	106	3	0	0	3	0	127.962	1.59e-07	541.497
588	NC1CCCC2C(N)CCCC12	TS	-2.7679	158.204	2.0042	52.7728	12	2	2	2	0	60	2	0	0	2	52.04	70.7928	2.94337	379.858
589	CCCCOCOCCCC	V	-2.8069	160.257	2.5773	46.587	11	2	0	2	8	68	0	0	0	0	18.46	69.8859	2.69092	56.5831
590	COC(=O)C1C(=CCCC1(C)C)C	TR	-2.9085	182.263	2.5419	52.278	13	2	0	2	1	74	0	0	1	1	26.3	79.9683	2.9358	238.475
591	CC(CC1CCCCC1)(C=C)C#N	TR	-3.0006	171.243	2.94498	54.063	13	1	0	1	3	66	1	0	0	1	23.79	79.324	2.80809	320.728
592	CCCCOC(=O)\C=C/C(=O)OCCCC	TR	-3.128	228.288	2.2292	60.874	16	4	0	4	8	92	0	0	0	0	52.6	96.6141	3.62822	209.173
593	N[C@@H](CSSC[C@H](N)C(O)=O)C(O)=O	TR	-3.1599	240.306	-0.8084	56.1384	14	6	4	8	7	82	0	0	0	0	126.64	88.8014	3.46818	192.008
594	CCCCC(CC)C(=O)OC	TR	-2.9898	158.241	2.3758	45.322	11	2	0	2	5	66	0	0	0	0	26.3	68.9339	3.65187	110.13
595	C1CCC=CC1	TR	-2.7105	82.146	2.1166	27.608	6	0	0	0	0	34	0	0	1	1	0	38.8685	2.25514	45.0587
596	CCCCC(CC)CO[P](O)(=O)OCC(CC)CCCC	TR	-3.3623	322.426	5.5528	88.3413	21	3	1	5	14	128	0	0	0	0	55.76	130.784	4.07538	259.451
597	C1CN(CCO1)SSN2CCOCC2	TR	-3.2596	236.362	0.8622	59.966	14	6	0	6	3	82	0	2	2	2	24.94	92.9459	1.59866	143.42
598	CC1CCC(Cl)CC1	TR	-3.1024	126.586	2.64842	36.189	8	0	0	1	0	42	1	0	0	1	0	54.0996	3.03246	143.247
599	CCOC(=O)C1=C(C)C=CCC1(C)C	TR	-3.4116	194.274	2.8521	56.871	14	2	0	2	2	78	0	0	1	1	26.3	85.6436	3.01208	295.444
600	CC(C)CCCCCN(CCCCCC(C)C)CCCCCC(C)C	TR	-4.0572	353.679	7.9376	116.358	25	1	0	1	18	152	0	0	0	0	3.24	160.893	3.87245	214.027
601	CC(=C)C(=O)OCC(F)(F)C(F)(F)C(F)(F)C(F)F	TR	-4.046	300.145	3.2767	46.618	19	2	0	10	6	112	0	0	0	0	26.3	101.569	5.07854	363.231
602	CCCCCCCCCCCCCCOC(=O)OOC(=O)OCCCCCCCCCCCCCC	TR	-4.3499	514.788	10.61	147.022	36	6	0	6	26	214	0	0	0	0	71.06	222.029	3.28156	426.355
603	CN(C)C(=S)SSC(=S)N(C)C	TR	-4.1162	240.444	2.0608	67.752	12	4	0	6	0	70	0	0	0	0	6.48	92.4474	3.69348	158.387
604	CCCCC(CC)CNCC(CC)CCCC	TR	-4.2367	241.463	5.0088	79.4817	17	1	1	1	12	104	0	0	0	0	12.03	109.763	3.61468	128.461
605	CCCCCC	TR	-3.9442	86.178	2.5866	29.816	6	0	0	0	3	38	0	0	0	0	0	40.564	2.33909	12
606	NC(NC#N)=NCCCCCCN=C(N)NC#N	TR	-4.4347	250.31	-0.68244	68.9442	18	4	4	8	7	98	0	0	0	0	148.4	106.379	3.42615	323.054
607	CCC(C)C(C)C(C)CCC1CCC(O)CC1	TR	-5.1824	234.383	4.6431	74.2108	17	1	1	1	6	96	1	0	0	1	20.23	105.875	2.42	314.802
608	CC[C@]12CC[C@H]3[C@@H](CCC4=C3CC=C(C4)OC)[C@@H]1CCC2=O	TR	-5.3638	300.442	4.8026	87.255	22	2	0	2	2	120	0	2	4	4	26.3	133.546	1.62542	556.055
609	NC(CO)(CO)CO	TR	0.7906	121.136	-2.3392	28.1758	8	4	4	4	3	50	0	0	0	0	86.71	47.5567	3.58321	54.0391
610	CC1=CC(=O)N2NC=NC2=N1	TS	-1.3472	150.141	-0.27398	38.3447	11	4	1	5	0	56	2	0	0	2	63.05	61.7034	3.02431	441.024
611	OCC1CCCO1	TR	0.3888	102.133	0.1577	26.0598	7	2	1	2	1	42	0	1	1	1	29.46	43.101	2.13996	48.0418
612	CC(=O)CC(C)=O	V	0.1864	100.117	0.5545	25.979	7	2	0	2	2	40	0	0	0	0	34.14	42.5221	3.31802	82.2533
613	CO	TS	1.4943	32.042	-0.3915	8.1428	2	1	1	1	0	14	0	0	0	0	20.23	13.5335	1	2
614	CC(O)=O.OCCN(CCO)CCO	TR	0.6794	209.242	-1.6438	51.0072	14	5	4	6	6	86	0	0	0	0	101.23	83.398	0	112.635
615	CC(C)CCCCCC(=O)NCCCCCC(O)=O	TR	-2.7709	271.401	3.3541	77.0365	19	2	2	4	12	112	0	0	0	0	66.4	116.516	3.23428	251.775
616	CCCCCCCCC(O)=O	TS	-2.7222	158.241	2.8216	45.6288	11	1	1	2	7	66	0	0	0	0	37.3	68.6145	2.84976	99.7359
617	CCC(N)(CO)CO	TS	0.9016	119.164	-0.9215	31.381	8	3	3	3	3	50	0	0	0	0	66.48	49.1274	3.58321	53.1843
618	O=C1N(CC2CO2)C(=O)N(CC3CO3)C(=O)N1CC4CO4	TR	-1.4954	297.267	-2.6319	68.442	21	9	0	9	6	114	1	3	3	4	103.59	117.812	1.80825	604.539
619	CC1(C)COC(=O)C1O	TR	0.6515	130.143	-0.0697	30.7468	9	3	1	3	0	52	0	1	1	1	46.53	53.6274	2.73309	139.238
620	NC#N	V	1.1245	42.041	-0.57382	9.8004	3	2	1	2	0	16	0	0	0	0	49.81	18.4717	2.47553	24.2647
621	CC(C)(CO)[C@@H](O)C(=O)NCCCO	TR	0.3944	205.254	-1.1356	51.5861	14	4	4	5	6	84	0	0	0	0	89.79	83.7529	3.98888	181.651
622	CC(O)CN(CC(C)O)CC(C)O	TR	0.4173	191.271	-0.5692	51.4824	13	4	3	4	6	80	0	0	0	0	63.93	79.8013	3.87427	102.254
623	CC(C)OC(C)=O	TS	-0.5468	102.133	0.9579	26.902	7	2	0	2	1	42	0	0	0	0	26.3	43.4741	3.12601	66.4804
624	COC1CC(CCC1NC(=O)C2CCC(CC2)N=NC3C(O)nC(NC#N)nC3[O-])N=NC4CCC5CC(CC(C5C4)[S]([O-])(=O)=O)[S]([O-])(=O)=O.OCC[NH+](CCO)CCO.OCC[NH+](CCO)CCO.OCC[NH+](CCO)CCO	TR	-0.8216	1167.24	-5.25352	278.457	80	27	15	33	28	440	5	0	0	5	502.45	459.339	5.9e-07	2902.91
625	CC(C)(C)CCCCCCCC(O)=O	TR	-2.1114	200.322	3.8478	59.4098	14	1	1	2	7	84	0	0	0	0	37.3	87.7094	3.10708	156.195
626	CC(C)OCCO	V	-0.0177	104.149	0.4037	28.1738	7	2	1	2	3	44	0	0	0	0	29.46	44.1068	2.67826	35.0614
627	CO[P](C)(=O)OC	TR	-0.0937	124.076	1.1021	27.5485	7	3	0	4	2	44	0	0	0	0	35.53	43.1592	3.60538	82.1808
628	CCCCOCC(C)OCC(C)O	TR	-0.6531	190.283	1.589	52.8218	13	3	1	3	8	80	0	0	0	0	38.69	81.0451	3.14757	104.343
629	CCOC(C)(C)CC	TR	-1.4719	116.204	2.2115	35.996	8	1	0	1	3	50	0	0	0	0	9.23	52.0424	3.37338	57.4072
630	O=C1N2C3CCCC4CCCC(N=C2C5CCCC6CCCC1C56)C34	TR	-7.2046	320.351	4.7451	102.672	25	3	0	3	0	116	6	0	0	6	34.37	141.647	2.08751	1501.13
631	C1CCC2CC3CCCCC3CC2C1	TR	-6.4448	178.234	3.993	61.454	14	0	0	0	0	66	3	0	0	3	0	82.7947	2.52373	488.759
632	O=C1C2CCCCC2C(=O)C3CCCCC13	TS	-6.0398	208.216	2.462	59.749	16	2	0	2	0	76	2	0	1	3	34.14	92.5356	2.34877	506.137
633	CCCC(Cl)CCCC(Cl)CCC(Cl)CCC(Cl)CCC(Cl)CCCC(Cl)CCC	TR	-7.9658	545.334	10.9122	143.066	30	0	0	6	21	182	0	0	0	0	0	216.953	3.7104	333.605
634	[Cu]1N2C3=NC4=NC(=NC5n1C(N=C6N=C(N=C2C7CCCCC37)C8CCCCC68)C9CCCCC59)C%10CCCCC4%10	TR	-8.1584	576.082	4.8483	155.336	41	8	0	9	0	195	6	0	4	10	84.02	238.317	1.47797	2289.56
635	S=[P](OC1CCCCC1)(OC2CCCCC2)OC3CCCCC3	TR	-6.9547	342.356	5.4479	95.495	23	4	0	5	6	116	3	0	0	3	27.69	140.266	1.86868	670.963
636	CC(C)CCC[C@@H](C)[C@H]1CC[C@H]2[C@@H]3CC=C4C[C@@H](O)CC[C@]4(C)[C@H]3CC[C@]12C	TR	-7.1002	386.664	7.3887	119.053	28	1	1	1	5	160	0	3	4	4	20.23	174.309	1.48945	591.07
637	O=[Cr]O[Cr]=O	/	-7.6863	151.989	-0.311	2.458	5	3	0	5	2	30	0	0	0	0	43.37	41.8287	2.65316	34.1577
638	NC1CCC(C2CCC(N)C3C(=O)C4CCCCC4C(=O)C23)C5C(=O)C6CCCCC6C(=O)C15	V	-6.2937	444.446	4.0688	127.317	34	6	2	6	1	162	4	0	2	6	120.32	193.377	1.68185	1525.73
639	CCOC(F)(C(F)(F)C(F)(F)C(F)(F)F)C(F)(C(F)(F)F)C(F)(F)F	TR	-7.2887	414.108	5.3545	47.363	25	1	0	16	5	152	0	0	0	0	9.23	127.255	6.9786	456.864
640	NC1C(OC2CCCCC2)C(OC3CCCCC3)C(N)C4C(=O)C5CCCCC5C(=O)C14	TS	-8.2717	422.44	5.211	121.606	32	6	2	6	4	156	4	0	1	5	104.64	183.557	1.76171	1260.47
641	CC(C)CCCCCCCOC(=O)C(C)=C	TR	-6.0559	226.36	4.1023	68.313	16	2	0	2	9	94	0	0	0	0	26.3	100.069	3.15774	206.781
642	CCCCCCOC(=O)C1CCCCC1C(=O)C2CCC(CC2O)N(CC)CC	TS	-7.3952	397.515	5.2065	115.967	29	5	1	5	11	156	2	0	0	2	66.84	172.858	2.20256	827.38
643	CCCCCCCCOC(=O)C1CCCCC1C(=O)OCC2CCCCC2	TR	-8.2877	368.473	5.5609	105.662	27	4	0	4	11	144	2	0	0	2	52.6	161.053	1.84143	709.328
644	CCCCCCCC(=O)CC(=O)C1CCCCC1	TR	-5.8837	246.35	4.189	73.7725	18	2	0	2	9	98	1	0	0	1	34.14	109.404	2.2196	367.943
645	CN1C(=O)C2CCC3C4CCC5C(=O)N(C)C(=O)C6CCC(C7CCC(C1=O)C2C37)C4C56	TR	-7.7185	418.408	3.037	128.058	32	6	0	6	0	152	7	0	0	7	78.14	177.715	1.91315	1886.35
646	ClC1C(Cl)C(Cl)C2C(=O)C(C3CCC4CCCC(N5C(=O)C6C(Cl)C(Cl)C(Cl)C(Cl)C6C5=O)C4n3)C(=O)C2C1Cl	/	-7.7274	693.968	9.4254	157.249	40	5	0	14	2	200	4	0	2	6	84.41	264.092	1.51894	1847.07
647	C[C@]12CC[C@H]3[C@@H](CCC4CC(O)CCC34)[C@@H]1CC[C@@H]2O	V	-4.8789	272.388	3.6092	78.7306	20	2	2	2	0	108	1	2	3	4	40.46	120.382	1.7112	538.22
648	OC(=O)C1C(Cl)CCC(Cl)C1Cl	TR	-1.4666	225.458	3.345	48.4313	12	1	1	5	1	64	1	0	0	1	37.3	83.6619	3.42893	335.669
649	CO[P](=O)(OC)C(O)C(Cl)(Cl)Cl	TR	-0.3315	257.437	2.1609	47.9213	12	4	1	8	3	74	0	0	0	0	55.76	85.2281	4.65783	183.232
650	CC1=CC(=O)NC(=S)N1	TR	-2.4259	142.183	0.74091	36.9844	9	2	2	4	0	48	1	0	0	1	48.65	56.7559	3.51562	282.974
651	CCO[P](=S)(OCC)OC1CCC2C(=C(Cl)C(=O)OC2C1)C	TR	-5.3835	362.771	4.43112	90.396	22	6	0	8	6	120	2	0	0	2	57.9	137.928	2.43202	778.632
652	CCOC(=O)C1(CCN(C)CC1)C2CCCCC2	TR	-1.8861	247.338	2.2131	71.484	18	3	0	3	3	98	1	1	1	2	29.54	108.745	2.31301	394.214
653	CC1CC(O)CCC1Cl	TR	-1.5704	142.585	2.35402	37.8538	9	1	1	2	0	48	1	0	0	1	20.23	58.8938	3.17168	220.156
654	CSCCC(N)C(O)=O	TR	-0.6593	149.215	0.1514	38.6102	9	3	2	4	4	54	0	0	0	0	63.32	58.6178	3.26591	96.9588
655	NC(CC1CCC(O)C(O)C1)C(O)=O	V	-1.5959	197.19	0.0522	49.0868	14	4	4	5	3	76	1	0	0	1	103.78	80.4103	2.77727	350.665
656	NCCCCCC(O)=O	TR	0.5854	131.175	0.5901	35.1582	9	2	2	3	5	54	0	0	0	0	63.32	54.8596	2.82887	83.127
657	ClC1=C(Cl)C2(Cl)C3C4CC(C5OC45)C3C1(Cl)C2(Cl)Cl	V	-6.2908	380.913	4.4814	77.575	19	1	0	7	0	104	0	4	5	5	12.53	139.968	1.80291	516.423
658	CC(C)(N)C(O)=O	TR	0.2453	103.121	-0.1917	25.9022	7	2	2	3	1	42	0	0	0	0	63.32	42.1297	3.79112	82.1808
659	N[C@@H](CC1CC(I)C(O)C(I)C1)C(O)=O	TR	-2.8583	432.983	1.5558	72.856	15	3	3	6	3	82	1	0	0	1	83.55	114.14	2.92373	371.939
660	C1CnC2C(C1)CCC3CCCnC23	TR	-1.826	180.21	2.783	57.044	14	2	0	2	0	66	3	0	0	3	25.78	81.234	2.61032	547.293
661	C[C@]12CC[C@H]3[C@@H](CCC4=CC(=O)CC[C@H]34)[C@@H]1CC[C@@]2(O)C#C	TR	-4.6271	298.426	3.4925	85.8758	22	2	1	2	0	118	0	3	4	4	37.3	132.915	1.65202	583.005
662	OCC1OC(OC2C(O)C(O)C(O)OC2CO)C(O)C(O)C1O	TR	0.3577	342.297	-5.3972	68.6194	23	11	8	11	4	136	0	2	2	2	189.53	130.436	2.11486	378.018
663	NC(CC1[nH]CnC1)C(O)=O	V	-0.5314	155.157	-0.6359	37.9029	11	3	3	5	3	60	1	0	0	1	92	63.2507	2.49876	231.985
664	NC1=CC=NC(=O)N1	TS	-1.1426	111.104	-0.6479	29.2701	8	3	2	4	0	42	1	0	0	1	71.77	45.3721	3.27742	228.725
665	COC1CCC(CC1)C(C2CCC(OC)CC2)C(Cl)(Cl)Cl	TR	-6.5386	345.653	5.2059	88.121	21	2	0	5	4	112	2	0	0	2	18.46	139.085	2.41454	526.466
666	NC1nCnC2nC[nH]C12	TS	-2.1179	135.13	-0.0649	36.0961	10	4	2	5	0	50	2	0	0	2	80.48	56.3211	2.95009	351.566
667	CCC1NC(=O)C2CC(C(Cl)CC2N1)[S](N)(=O)=O	V	-3.2859	289.744	0.8788	67.9931	18	4	3	8	2	98	1	0	1	2	101.29	109.551	2.57595	615.039
668	CC#C	V	-1.0417	40.065	0.6395	14.507	3	0	0	0	0	16	0	0	0	0	0	20.4684	2.47553	21.5098
669	BrC(Br)Br	V	-1.9113	252.731	2.4547	30.569	4	0	0	3	0	26	0	0	0	0	0	50.3419	2.32379	8
670	CC(C)I	TR	-2.0843	169.993	1.8298	29.156	4	0	0	1	0	26	0	0	0	0	0	40.731	2.32379	8
671	FC(Cl)(Cl)C(F)(Cl)Cl	TR	-3.2301	203.83	3.1882	31.09	8	0	0	6	1	50	0	0	0	0	0	64.6483	4.02039	67.0196
672	CC1(C)C2CCC1(C)C(=O)C2	TR	-1.9784	152.237	2.4017	44.236	11	1	0	1	0	62	0	2	2	2	17.07	68.1736	2.47415	216.913
673	OC1(C(=O)NC(=O)NC1=O)C2(O)C(=O)NC(=O)NC2=O	TR	-1.9942	286.156	-4.8194	53.2624	20	8	6	12	1	106	0	2	2	2	191	108.039	2.56558	503.284
674	ClC1C=CC2C1C3(Cl)C(=C(Cl)C2(Cl)C3(Cl)Cl)Cl	TS	-6.3168	373.321	5.2415	76.098	17	0	0	7	0	94	0	1	3	3	0	133.75	2.31718	467.275
675	CC1(C(=O)NC(=O)NC1=O)C2CCCCC2	TS	-2.4581	218.212	0.3103	55.4754	16	3	2	5	1	82	1	1	1	2	75.27	91.8346	2.48097	447.378
676	CCC(C)(O)CC	V	-0.38	102.177	1.5574	31.2058	7	1	1	1	2	44	0	0	0	0	20.23	45.3582	3.36044	42.1417
677	CCOC(=O)CC(O)(CC(=O)OCC)C(=O)OCC	TR	-0.6285	276.285	0.187	64.0828	19	7	1	7	8	110	0	0	0	0	99.13	111.373	4.8462	304.04
678	CC1CCC(O[P](=O)(OC2CCC(C)CC2)OC3CCC(C)CC3)CC1	TR	-6.0892	368.369	6.25676	103.028	26	4	0	5	6	134	3	0	0	3	44.76	153.531	1.87696	777.813
679	CC(C)(OOC(C)(C)C1CCCCC1)C2CCCCC2	TR	-5.7692	270.372	4.8052	81.106	20	2	0	2	5	106	2	0	0	2	18.46	120.835	2.08021	478.359
680	CCC(C)(C)C1CCC(O)CC1	V	-2.9902	164.248	3.0798	51.4238	12	1	1	1	2	66	1	0	0	1	20.23	74.0503	2.96429	246.212
681	CN1CCN(CC1)C(C2CCCCC2)C3CCCCC3	TR	-2.4255	266.388	3.0234	83.797	20	2	0	2	3	104	2	1	1	3	6.48	121.192	1.91956	476.129
682	CC1CC2N=C3C(=O)NC(=O)N=C3N(CC(O)C(O)C(O)CO)C2CC1C	TR	-3.6478	376.369	-1.72356	95.6209	27	9	5	10	5	144	1	0	2	3	161.56	152.292	2.27529	1075.45
683	OC1CCCC(O)C1O	V	0.6043	126.111	0.8034	31.4364	9	3	3	3	0	48	1	0	0	1	60.69	51.8141	3.24783	199.293
684	BrC1C(Br)C(Br)C(Br)C(Br)C1Br	TR	-9.5374	551.49	6.2616	72.642	12	0	0	6	0	66	1	0	0	1	0	120.637	3.60357	226.303
685	OC1C(Cl)CC(Cl)CC1Cl	TS	-2.3924	197.448	3.3524	43.1368	10	1	1	4	0	54	1	0	0	1	20.23	73.1354	3.31053	236.165
686	CCC(C)C1CC(CC(C1O)[N+]([O-])=O)[N+]([O-])=O	TS	-3.6646	240.215	2.7221	60.1216	17	5	1	7	4	92	1	0	0	1	106.51	96.9914	3.48047	472.009
687	NC(=O)C1CCCCC1C(N)=O	TR	-2.4371	164.164	-0.1156	43.4778	12	2	2	4	2	62	1	0	0	1	86.18	69.1641	3.26708	300.585
688	NC1CCC(Cl)CC1[N+]([O-])=O	TR	-2.538	172.571	1.8304	42.5188	11	3	1	5	1	58	1	0	0	1	69.16	67.7275	3.23221	300.634
689	OCC(O)C(O)C1OC(=O)C(O)C1O	TS	0.3348	208.166	-3.6523	40.993	14	7	5	7	3	82	0	1	1	1	127.45	79.1693	2.65785	218.084
690	CCCC(O)C(CC)CO	TR	-0.5418	146.23	1.1659	41.7816	10	2	2	2	5	62	0	0	0	0	40.46	62.8823	3.52993	69.6578
691	CC1CCCO1	V	0.2069	86.134	1.1853	24.648	6	1	0	1	0	36	0	1	1	1	9.23	38.3067	2.18411	37.2031
692	CCCC(C)C(O)=O	TR	-0.889	116.16	1.5072	31.7078	8	1	1	2	3	48	0	0	0	0	37.3	49.5197	3.31809	78.5977
693	CC(C)COC(=O)C(C)C	V	-2.159	144.214	1.8416	40.635	10	2	0	2	3	60	0	0	0	0	26.3	62.5689	3.40375	105.825
694	CC(C)(C)C1CCC(O)C(O)C1	TR	-1.9197	166.22	2.3953	48.4716	12	2	2	2	0	66	1	0	0	1	40.46	72.4796	3.13826	284.38
695	CC(O)C1CCCCC1	TS	-1.7969	122.167	1.7399	37.0758	9	1	1	1	1	48	1	0	0	1	20.23	54.9555	2.84823	167.182
696	OC(=O)C1CCC(CC1)C(O)=O	TR	-4.0444	166.132	1.083	40.3606	12	2	2	4	2	62	1	0	0	1	74.6	68.0728	3.00615	279.335
697	CCN1CCOCC1	V	0.9386	115.176	0.3385	32.933	8	2	0	2	1	48	0	1	1	1	12.47	50.4315	2.12502	59.5489
698	CCCCN(CCCC)CCCC	TR	-3.1157	185.355	3.6887	61.164	13	1	0	1	9	80	0	0	0	0	3.24	84.5134	3.46799	72.1057
699	CC(=O)NC1CCC(C)CC1	V	-2.0946	149.193	1.95342	45.4827	11	1	1	2	1	58	1	0	0	1	29.1	66.2376	2.7363	250.77
700	CC1CCC(CC1)[S](O)(=O)=O	V	0.5564	172.205	1.24172	40.9936	11	2	1	4	1	60	1	0	0	1	54.37	65.425	3.20152	336.453
701	COC(=O)CC(C)=O	V	0.6341	116.116	0.1385	27.314	8	3	0	3	2	46	0	0	0	0	43.37	47.6356	3.3955	106.241
702	CCCCCCC(=O)OCC	V	-2.7369	158.241	2.5199	45.392	11	2	0	2	6	66	0	0	0	0	26.3	68.9339	3.04043	99.7359
703	CCCCC(=O)CC	V	-1.4242	114.188	2.1557	34.823	8	1	0	1	4	48	0	0	0	0	17.07	51.0904	2.9886	66.7871
704	CCCCCC(=O)CC	TR	-1.693	128.215	2.5458	39.44	9	1	0	1	5	54	0	0	0	0	17.07	57.4554	2.97306	76.6368
705	COC(=O)CCCCCCCCC(=O)OC	TR	-3.2831	230.304	2.4532	60.968	16	4	0	4	9	94	0	0	0	0	52.6	97.3037	3.09761	179.195
706	CCC#C	TR	-1.2753	54.092	1.0296	19.124	4	0	0	0	0	22	0	0	0	0	0	26.8333	2.4331	29.7932
707	ClCC=C	TS	-1.3562	76.526	1.4112	20.917	4	0	0	1	1	24	0	0	0	0	0	31.0828	2.29684	17.2451
708	CC(C)CC(C)O	TR	-0.7945	102.177	1.4133	31.1358	7	1	1	1	2	44	0	0	0	0	20.23	45.3582	2.95322	33.4447
709	CC1OC(C)OC(C)OC(C)O1	TR	-2.8997	176.212	1.4504	42.188	12	4	0	4	0	72	0	1	1	1	36.92	72.7422	2.45005	99.0196
710	CCOC(=O)CC(C)C	V	-1.8135	130.187	1.5956	36.088	9	2	0	2	3	54	0	0	0	0	26.3	56.204	3.27119	86.9169
711	CC1CNCCN1	V	0.6378	100.165	-0.4323	30.3344	7	2	2	2	0	42	0	1	1	1	24.06	44.2929	2.12292	48.0418
712	CC(C)COC=C	TR	-1.5236	100.161	1.8025	30.987	7	1	0	1	3	42	0	0	0	0	9.23	44.9879	2.80998	48.1417
713	CC(C)COC(C)=O	TS	-1.2657	116.16	1.2055	31.471	8	2	0	2	2	48	0	0	0	0	26.3	49.839	3.05008	76.5977
714	CC(C)CCOC=O	V	-1.5206	116.16	1.2055	31.471	8	2	0	2	4	48	0	0	0	0	26.3	49.839	2.814	59.5489
715	ClC/C=C/CCl	TS	-2.1675	124.998	2.0202	30.58	6	0	0	2	2	36	0	0	0	0	0	47.751	2.73439	34.8127
716	OC(=O)CCCCCCCCC(O)=O	TR	-2.3059	202.25	2.2764	52.2076	14	2	2	4	9	82	0	0	0	0	74.6	83.9352	2.98954	156.961
717	CCCCCCCCC	TR	-5.7657	128.259	3.7569	43.667	9	0	0	0	6	56	0	0	0	0	0	59.6588	2.59508	33.303
718	ClCCOCOCCCl	TR	-1.3461	173.039	1.4547	38.211	9	2	0	4	6	56	0	0	0	0	18.46	65.0326	2.59508	46.2227
719	ClCCO[P](=O)(OCCCl)OCCCl	TR	-1.6105	285.491	2.8607	57.6225	14	4	0	8	9	86	0	0	0	0	44.76	98.364	3.96595	151.93
720	CNC(=O)O\N=C\C(C)(C)SC	TR	-1.4991	190.268	1.4698	51.6267	12	4	1	5	3	70	0	0	0	0	50.69	76.7263	3.83175	180.245
721	[O-][N+](=O)C1CCC(Cl)CC1C(F)(F)F	V	-3.3533	225.553	3.267	43.1084	14	2	0	7	1	76	1	0	0	1	43.14	81.2492	3.37712	377.688
722	COC1CCC(C=O)CC1OC	TS	-1.4199	166.176	1.5163	44.9335	12	3	0	3	3	64	1	0	0	1	35.53	70.9148	3.09774	281.102
723	[O-][N+](=O)N1CN(CN(C1)[N+]([O-])=O)[N+]([O-])=O	V	-3.5706	222.117	-1.6464	41.1012	15	6	0	12	3	84	0	1	1	1	139.14	81.6121	2.76819	251.693
724	OCCNC1CCCCC1	V	-0.4745	137.182	1.0908	42.0175	10	2	2	2	3	54	1	0	0	1	32.26	60.5054	2.42652	173.872
725	CC(C)=CCCC(=C)C=C	TR	-4.3861	136.238	3.475	48.002	10	0	0	0	4	56	0	0	0	0	0	63.9549	3.4629	145.421
726	CC(C)CCOC(C)=O	TS	-1.8135	130.187	1.5956	36.088	9	2	0	2	3	54	0	0	0	0	26.3	56.204	3.00611	86.9169
727	CCCCOCCOCCOC(C)=O	TR	-0.8188	204.266	1.3828	53.179	14	4	0	4	9	84	0	0	0	0	44.76	85.5259	2.88406	136.084
728	OCC(CO)(CO)COCC(CO)(CO)CO	TR	-1.9582	254.279	-3.0704	58.1998	17	7	6	7	10	104	0	0	0	0	130.61	99.9027	4.2763	152.564
729	OC1CCC(C=O)CC1O	TR	-1.3402	138.122	0.9103	35.1591	10	3	2	3	1	52	1	0	0	1	57.53	57.5463	3.1589	255.028
730	C(CNCC1CCCCC1)NCC2CCCCC2	TR	-1.7865	240.35	2.566	76.2974	18	2	2	2	7	94	2	0	0	2	24.06	109.048	1.54317	381.865
731	CCOC(=O)\C=C/C(=O)OCC	TS	-1.0899	172.18	0.6688	42.406	12	4	0	4	4	68	0	0	0	0	52.6	71.1544	3.72816	163.497
732	OC(=O)CC(O)=O	TS	0.8652	104.061	-0.4543	19.8886	7	2	2	4	2	40	0	0	0	0	74.6	39.3806	3.31802	83.108
733	O=C1NC(=S)NC=C1	TR	-2.2573	128.156	0.43249	32.2474	8	2	2	4	0	42	1	0	0	1	48.65	50.391	3.50212	248.362
734	OC(=O)CC1(CC(O)=O)OCOC1=O	TR	-0.611	204.134	-0.7945	39.2806	14	5	2	7	4	78	0	1	1	1	110.13	78.2232	2.83089	265.763
735	CC(O)C(N)C(O)=O	TR	0.067	119.12	-1.2209	27.292	8	3	3	4	2	48	0	0	0	0	83.55	46.924	3.63768	91.2842
736	C1CCC2CC3C4CCCC5CCCC(C3CC2C1)C45	TR	-8.4989	252.316	5.6404	85.884	20	0	0	0	0	92	4	0	1	5	0	116.846	2.02262	915.866
737	CCC(C)N1C(=O)NC(=C(Br)C1=O)C	TR	-2.5057	261.119	1.57852	58.7617	14	3	1	5	2	78	1	0	0	1	54.86	90.096	3.52908	447.106
738	CCC(C)C(N)C(O)=O	TS	-0.5033	131.175	0.4444	35.0662	9	2	2	3	3	54	0	0	0	0	63.32	54.8596	3.71614	103.231
739	CC(C)CC(N)C(O)=O	V	-1.0456	131.175	0.4444	35.0662	9	2	2	3	3	54	0	0	0	0	63.32	54.8596	3.50169	101.231
740	C[C@]12CCC(=O)C=C1CC[C@@H]3[C@@H]2CC[C@@]4(C)[C@H]3CC[C@@]4(O)C#C	TS	-5.6576	312.453	3.8826	90.4928	23	2	1	2	0	124	0	3	4	4	37.3	139.28	1.70241	626.243
741	C1CC2C3CCC4CCCCC4C3CC5CCCC1C25	V	-7.8613	254.332	5.2448	86.368	20	0	0	0	0	94	4	0	1	5	0	117.2	2.10224	992.786
742	[O-][N+](=O)C1C(=O)NC(=O)NC1=O	TR	-2.284	173.084	-2.0023	32.4638	12	5	2	8	1	64	0	1	1	1	118.41	65.0655	2.8789	264.418
743	C\C(=C\C(O)=O)C(O)=O	TR	0.7795	130.099	0.1019	29.0286	9	2	2	4	2	50	0	0	0	0	74.6	51.4209	4.16921	167.797
744	NC1CCCCn1	V	0.9757	94.117	0.6638	28.6494	7	2	1	2	0	36	1	0	0	1	38.91	41.9909	3.02147	136.008
745	OC(=O)CCCCCCC(O)=O	TS	-1.1673	174.196	1.4962	42.9736	12	2	2	4	7	70	0	0	0	0	74.6	71.2054	3.00731	135.137
746	CC1(C)C2CCC1(C)C(O)C2	TR	-2.3202	154.253	2.1935	45.2358	11	1	1	1	0	64	0	2	2	2	20.23	68.8063	2.39625	185.312
747	CC(C)C(N)C(O)=O	TS	-0.1971	117.148	0.0543	30.4492	8	2	2	3	2	48	0	0	0	0	63.32	48.4947	3.63768	90.4295
748	CC(C)NCC(O)COC1CCCC2CCCCC12	TR	-3.6202	259.349	2.5775	78.5885	19	3	2	3	6	102	2	0	0	2	41.49	113.76	1.97794	519.643
749	OC(=O)C1CCC(C(O)=O)C(C1)C(O)=O	TR	-1.0003	210.141	0.7812	47.3199	15	3	3	6	3	78	1	0	0	1	111.9	83.3935	3.39635	447.916
750	COC1CCCCC1OCC(O)COC(N)=O	TR	-1.5251	241.243	0.5302	60.0312	17	5	2	6	6	94	1	0	0	1	91.01	98.8924	2.41076	368.634
751	CN1CSC(=S)N(C)C1	V	-1.7331	162.283	0.7967	45.449	9	3	0	4	0	52	0	1	1	1	6.48	65.1947	2.43836	126.126
752	OC(=O)C1CC(O)C(O)C(OC(=O)C2CC(O)C(O)C(O)C2)C1	TR	-2.8092	322.225	1.132	73.1258	23	8	6	9	3	120	2	0	0	2	164.75	127.42	2.391	787.131
753	CCC1CCnCC1	V	-0.0006	107.156	1.644	33.615	8	1	0	1	1	42	1	0	0	1	12.89	49.3809	2.83209	145.733
754	CCCCC(=O)OCC	TR	-1.7706	130.187	1.7397	36.158	9	2	0	2	4	54	0	0	0	0	26.3	56.204	3.06132	78.9853
755	CC(C)CC(C)(C)C	TS	-4.6704	114.232	3.0786	38.91	8	0	0	0	1	50	0	0	0	0	0	53.2938	3.38892	54.9288
756	CC(N)CC(O)=O	V	0.9867	103.121	-0.1917	25.9022	7	2	2	3	2	42	0	0	0	0	63.32	42.1297	3.12601	70.09
757	NC(CC1CCC(O)CC1)C(O)=O	V	-2.6561	181.191	0.3466	47.422	13	3	3	4	3	70	1	0	0	1	83.55	75.6161	2.64176	294.233
758	CCCOC	TS	-0.3857	74.123	1.0428	22.167	5	1	0	1	2	32	0	0	0	0	9.23	32.9476	2.19061	11.1194
759	CCO[P](=S)(OCC)SCS[P](=S)(OCC)OCC	TR	-5.2838	384.487	5.0053	95.123	19	8	0	10	12	116	0	0	0	0	36.92	134.443	4.35957	279.341
760	CCC(C)C(C)=O	TS	-0.6805	100.161	1.6215	30.136	7	1	0	1	2	42	0	0	0	0	17.07	44.7255	3.34342	66.5803
761	NCC(O)C(O)=O	TS	-0.8229	105.093	-1.6094	22.697	7	3	3	4	2	42	0	0	0	0	83.55	40.559	3.34342	72.5803
762	CC(C)C(C)C(C)C	V	-4.6961	114.232	2.9345	38.84	8	0	0	0	2	50	0	0	0	0	0	53.2938	3.46423	45.0587
763	COC1CCC2COC(=O)C2C1OC	TR	-1.8903	194.186	1.3742	48.6655	14	4	0	4	2	74	1	0	1	2	44.76	81.3875	2.62525	383.954
764	CCN(CC)C1nC(Cl)nC(n1)N(CC)CC	TR	-4.4112	257.769	2.2174	71.959	17	5	0	6	6	96	1	0	0	1	45.15	107.833	3.08354	319.465
765	OC(=O)C\C(=C/C(O)=O)C(O)=O	TR	0.3612	174.108	-0.4433	35.6074	12	3	3	6	4	66	0	0	0	0	111.9	66.7416	4.55211	250.764
766	OC(=O)COC1CCCC(Cl)C1	TS	-2.1954	186.594	1.8034	44.5828	12	2	1	4	3	64	1	0	0	1	46.53	74.5339	2.57494	285.386
767	C1CCC(CC1)\C=C\C2CCCCC2	TR	-5.7905	180.25	3.857	61.812	14	0	0	0	2	68	2	0	0	2	0	84.5288	2.15934	357.068
768	CCCC\C=C\C	V	-3.816	98.189	2.7527	34.339	7	0	0	0	3	42	0	0	0	0	0	46.2393	2.68916	44
769	CCCCOC=O	TS	-1.1307	102.133	0.9595	26.924	7	2	0	2	4	42	0	0	0	0	26.3	43.4741	2.55878	43.3448
770	CCC(C)(O)C(C)C	TR	-0.8504	116.204	1.8034	35.7528	8	1	1	1	2	50	0	0	0	0	20.23	51.7231	3.70832	64.7871
771	OC(=O)C1CCCC(C1C(O)=O)[N+]([O-])=O	TR	-1.0214	211.129	0.9912	47.015	15	4	2	7	3	78	1	0	0	1	117.74	82.7258	3.55595	420.195
772	COC(=O)C1CCCCC1C(=O)C2CCCCC2	TR	-3.4776	240.258	2.7042	67.656	18	3	0	3	3	90	2	0	0	2	43.37	105.02	2.4584	573.302
773	BrC1CCCC(Br)C1Br	TR	-5.0402	314.802	3.9741	49.542	9	0	0	3	0	48	1	0	0	1	0	79.034	3.24783	199.293
774	BrC1CCC(Br)C(Br)C1	TR	-4.808	314.802	3.9741	49.542	9	0	0	3	0	48	1	0	0	1	0	79.034	3.17168	219.543
775	CCCCC(N)C(O)=O	TR	-1.0453	131.175	0.5885	35.1362	9	2	2	3	4	54	0	0	0	0	63.32	54.8596	3.26591	93.0587
776	CCCC(O)C(C)C	TS	-1.3093	116.204	1.8034	35.7528	8	1	1	1	3	50	0	0	0	0	20.23	51.7231	3.17082	50.3485
777	OC(=O)C1CCC(CC1)C#N	TR	-2.0885	147.133	1.25648	38.1163	11	2	1	3	1	54	1	0	0	1	61.09	63.5096	3.03164	307.859
778	CCCCC(=O)OC	V	-1.3606	116.16	1.3496	31.541	8	2	0	2	3	48	0	0	0	0	26.3	49.839	2.9886	68.9288
779	CC(C)(C)CCO	TS	-1.1308	102.177	1.4149	31.1578	7	1	1	1	1	44	0	0	0	0	20.23	45.3582	3.15449	42.6319
780	CC(C)CC(C)(C)O	TS	-0.9307	116.204	1.8034	35.7528	8	1	1	1	2	50	0	0	0	0	20.23	51.7231	3.38892	59.2773
781	CCOC(C)C	TS	-0.5607	88.15	1.4313	26.762	6	1	0	1	2	38	0	0	0	0	9.23	39.3126	2.62721	25.1194
782	ClC1CCCC(I)C1	TR	-3.55	238.455	2.9446	44.169	8	0	0	2	0	42	1	0	0	1	0	66.9965	3.07766	168.388
783	CC(C)CCCO	V	-1.1286	102.177	1.4149	31.1578	7	1	1	1	3	44	0	0	0	0	20.23	45.3582	2.67826	33.1613
784	COC(=O)CCCCC(=O)OC	TR	-1.4629	174.196	0.8928	42.5	12	4	0	4	5	70	0	0	0	0	52.6	71.844	3.21173	135.137
785	CCCOCC	V	-0.6806	88.15	1.4329	26.784	6	1	0	1	3	38	0	0	0	0	9.23	39.3126	2.33909	15.9001
786	CCCCCCCCCCCCCCCO	TR	-6.3476	228.42	5.0699	72.7808	16	1	1	1	13	98	0	0	0	0	20.23	102.643	2.82826	98.0026
787	CCCCCCCCCCCCCCCCCCCCCCCCCC	TR	-8.3339	366.718	10.3886	122.156	26	0	0	0	23	158	0	0	0	0	0	167.863	2.94691	196.078
788	ClCC(Cl)(Cl)Cl	TR	-2.1955	167.85	2.5954	31.01	6	0	0	4	0	38	0	0	0	0	0	56.3173	3.16849	35.303
789	CCOC(C)(C)C	TS	-0.9302	102.177	1.8214	31.379	7	1	0	1	1	44	0	0	0	0	9.23	45.6775	3.15449	42.6319
790	CC(C)CC=C	TS	-3.2439	84.162	2.2185	29.652	6	0	0	0	2	36	0	0	0	0	0	39.8744	2.81414	35.303
791	OCCCC=C	V	-0.1793	86.134	0.9449	26.5168	6	1	1	1	3	36	0	0	0	0	20.23	38.3037	2.4884	32.9197
792	CCC#CCC	TR	-2.1675	82.146	1.8098	28.358	6	0	0	0	0	34	0	0	0	0	0	39.5632	2.89867	53.8428
793	CC(=O)C1(C)CCC2C3C=C(C)C4=CC(=O)CCC4(C)C3CCC12C	TR	-5.2721	340.507	5.2797	100.021	25	2	0	2	1	136	0	2	4	4	34.14	151.688	1.79717	713.604
794	CNC1nC(NC(C)C)nC(SC)n1	TR	-2.5656	213.31	1.4555	59.9134	14	6	2	6	4	78	1	0	0	1	62.73	88.1379	2.92002	279.533
795	ClC1C2OC2C3C1C4(Cl)C(=C(Cl)C3(Cl)C4(Cl)Cl)Cl	TR	-6.2893	389.32	4.4527	75.619	18	1	0	8	0	100	0	3	4	4	12.53	138.547	2.01049	476.455
796	COC(=O)CCCC(=O)OC	TR	-0.4337	160.169	0.5027	37.883	11	4	0	4	4	64	0	0	0	0	52.6	65.479	3.27038	125.376
797	OC1CCC(CC1)C2CCCCC2	TS	-3.468	176.259	3.4399	53.9328	13	1	1	1	1	70	1	1	1	2	20.23	79.4095	2.10018	256.958
798	CCC(C(CC)C(O)=O)C(O)=O	V	-0.8608	174.196	1.208	42.8336	12	2	2	4	5	70	0	0	0	0	74.6	71.2054	4.43788	155.897
799	CC1COCC2CC3C(CC12)C(C)(C)C(C)C3(C)C	TR	-5.1693	258.405	4.5252	79.729	19	1	0	1	0	104	1	0	2	3	9.23	116.913	2.24528	524.737
800	CC1CC(Cl)CCC1O	TS	-1.552	142.585	2.35402	37.8538	9	1	1	2	0	48	1	0	0	1	20.23	58.8938	3.17168	220.156
801	CCNC1nC(NC(C)C)nC(OC)n1	TR	-2.0696	211.269	1.1323	59.3014	15	6	2	6	5	84	1	0	0	1	71.96	89.4933	2.89175	315.371
802	NC1=C(Cl)C(=O)N(N=C1)C2CCCCC2	TR	-2.7436	221.647	1.4681	59.2564	15	4	1	5	1	76	2	0	0	2	60.91	90.9109	2.66028	536.109
803	OC(=O)C1nC(Cl)CCC1Cl	TR	-1.3884	192.001	2.0866	41.2163	11	2	1	5	1	58	1	0	0	1	50.19	72.5783	3.23221	300.634
804	ClC1CCC(Cl)C2CCCCC12	TR	-5.3576	197.064	4.1466	53.968	12	0	0	2	0	60	2	0	0	2	0	80.7196	2.94647	380.608
805	COCC1oC(C=O)CC1	V	-0.4992	140.138	1.2385	34.8085	10	3	0	3	3	54	1	0	0	1	39.44	58.5956	2.67737	214.381
806	NC1C(Cl)C(Cl)nC(C(O)=O)C1Cl	TR	-2.7494	241.461	2.3222	50.6387	13	3	2	7	1	70	1	0	0	1	76.21	88.2214	3.49738	380.632
807	CNC(=O)OC1CC(C)C(SC)C(C)C1	TR	-3.9214	225.313	2.74354	62.7807	15	3	1	4	2	82	1	0	0	1	38.33	94.2042	2.98089	353.846
808	CCOC(=O)CCCCCC(=O)OCC	TR	-2.0408	216.277	2.0631	56.351	15	4	0	4	8	88	0	0	0	0	52.6	90.9388	3.24124	169.027
809	COC(C)C(N)C(O)=O	TR	0.4853	133.147	-0.5668	32.0822	9	3	2	4	3	54	0	0	0	0	72.55	53.6082	3.71614	104.376
810	C[C@H]1CCCC[C@H]1C	TR	-4.2719	112.216	2.8326	36.796	8	0	0	0	0	48	0	1	1	1	0	52.288	2.2794	56.4386
811	OC(=O)CCCCC1CCCCC1	V	-2.4657	178.231	2.484	51.6328	13	1	1	2	5	70	1	0	0	1	37.3	78.2119	2.16862	254.053
812	CCO[P](=S)(OCC)SCN1C(=O)OC2CC(Cl)CCC12	TR	-5.0813	367.816	4.2361	90.612	21	7	0	9	7	116	2	0	0	2	53.6	136.019	2.25267	719.606
813	CC1nCC2nCCnC2n1	TS	-0.1191	146.153	0.72822	39.865	11	4	0	4	0	54	2	0	0	2	51.56	63.3566	2.8289	384.852
814	CC1nCnC2nCCnC12	V	-0.4658	146.153	0.72822	39.865	11	4	0	4	0	54	2	0	0	2	51.56	63.3566	2.91316	379.602
815	OC(=O)CN(C[P](O)(O)=O)C[P](O)(O)=O	TR	-0.0256	263.079	-1.3566	48.164	15	4	5	11	6	90	0	0	0	0	155.6	84.6525	4.52541	292.603
816	CC1C2CCCCC2CC3C4CCCCC4CCC13	TR	-7.343	242.321	5.45462	83.697	19	0	0	0	0	90	4	0	0	4	0	111.841	2.31819	916.74
817	OC1CCC2CCCCC2C1N=O	TR	-2.9374	173.171	2.9433	51.0678	13	3	1	3	1	64	2	0	0	2	49.66	74.602	2.91178	465.431
818	C[C@@](CCC([O-])=O)(N=N[C@](C)(CCC([O-])=O)C#N)C#N	TR	-2.0083	278.268	-0.93664	61.374	20	8	0	8	8	108	0	0	0	0	152.56	115.897	4.92042	446.666
819	CCC(N)C(O)=O	TR	0.2868	103.121	-0.1917	25.9022	7	2	2	3	2	42	0	0	0	0	63.32	42.1297	3.34342	72.09
820	CCO[P](=S)(OCC)OC1nC(Cl)C(Cl)CC1Cl	TS	-5.4956	350.591	4.7181	77.432	18	5	0	9	6	102	1	0	0	1	40.58	125.741	3.00613	464.616
821	CC(C)C(NC(C)=O)C(O)=O	TS	-0.6325	159.185	0.2317	40.0785	11	2	2	4	3	64	0	0	0	0	66.4	65.596	4.11529	165.069
822	CC(C)(C)CCCO	V	-1.5402	116.204	1.805	35.7748	8	1	1	1	2	50	0	0	0	0	20.23	51.7231	3.11177	51.8974
823	[O-][N+](=O)C1CCCC(Cl)C1Cl	V	-3.4881	192.001	2.9016	43.1164	11	2	0	5	1	58	1	0	0	1	43.14	72.6909	3.27358	300.634
824	CCC1(C(=O)NC(=O)NC1=O)C2=CC3CCC(C3)C2	TR	-2.7696	262.309	1.4952	67.9364	19	3	2	5	2	102	0	2	3	3	75.27	111.361	2.00816	474.92
825	CCC1C2CCCCC2CC3C1CCC4CCCCC34	TS	-6.796	256.348	5.7086	88.338	20	0	0	0	1	96	4	0	0	4	0	118.206	2.30053	932.228
826	[nH]1C2CCCCC2nC1C3oCCC3	TR	-3.414	184.198	2.8229	53.7957	14	2	1	3	1	68	3	0	0	3	41.82	80.3933	2.24409	518.449
827	OC(=O)C[C@@H](Cl)C(O)=O	V	-0.7953	152.533	0.1531	29.5296	9	2	2	5	3	52	0	0	0	0	74.6	56.0489	3.63243	132.529
828	C\C=C/CO	V	0.3621	72.107	0.5548	21.8998	5	1	1	1	1	30	0	0	0	0	20.23	31.9387	2.62242	30.6292
829	OC(=O)C1CCCnC1NC2CCCC(C2)C(F)(F)F	V	-4.1718	282.221	3.5422	65.923	20	3	2	7	3	104	2	0	0	2	62.22	111.44	2.33793	641.509
830	CN(C=C)N=O	V	-0.4579	86.094	0.7431	23.755	6	2	0	3	2	34	0	0	0	0	32.67	36.2042	3.20691	53.8135
831	OC(=O)CCSSCCC(O)=O	TR	-0.9301	210.276	1.3172	49.4216	12	4	2	6	7	70	0	0	0	0	74.6	78.1217	3.00731	141.627
832	CC(C)C(O)C=C	V	-0.515	100.161	1.1893	31.0418	7	1	1	1	2	42	0	0	0	0	20.23	44.6686	3.32998	57.2004
833	CCC(O)\C=C\C	V	-0.4198	100.161	1.3334	31.1118	7	1	1	1	2	42	0	0	0	0	20.23	44.6686	3.15949	57.2004
834	CCCCC(C)(O)CC	V	-1.7356	130.231	2.3376	40.4398	9	1	1	1	4	56	0	0	0	0	20.23	58.0881	3.33007	66.9679
835	CO[P](=S)(OC)OC1nC(Cl)C(Cl)CC1Cl	TR	-4.831	322.537	3.9379	68.198	16	5	0	9	4	90	1	0	0	1	40.58	113.011	3.06377	437.13
836	CC(C)OC(=O)C(O)(C1CCC(Cl)CC1)C2CCC(Cl)CC2	TS	-5.3544	339.218	4.1809	87.1308	22	3	1	5	4	116	2	0	0	2	46.53	138.989	2.54762	603.109
837	CNCC(O)C(O)C(O)C(O)CO	TR	0.4084	195.215	-3.3583	45.0397	13	6	6	6	6	80	0	0	0	0	113.18	76.4499	3.99168	134.051
838	NC(CCC(O)=O)C(O)=O	TS	-0.9916	147.13	-0.7369	32.481	10	3	3	5	4	58	0	0	0	0	100.62	57.4504	3.49073	144.583
839	CC(Cl)C(C)Cl	TS	-2.3541	127.014	2.241	30.63	6	0	0	2	1	38	0	0	0	0	0	48.4406	2.9935	26.5293
840	CCCCC(NC(C)=O)C(O)=O	TR	-0.6823	173.212	0.7659	44.7655	12	2	2	4	5	70	0	0	0	0	66.4	71.961	3.86542	167.686
841	ClCl	V	-1.0513	70.906	1.379	11.706	2	0	0	2	0	14	0	0	0	0	0	22.5706	1	0
842	COC(=O)\C=C(/C)O[P](=O)(OC)OC	TR	0.4276	224.149	1.4807	48.4825	14	6	0	7	5	82	0	0	0	0	71.06	82.4046	4.44286	263.354
843	CC(C)OC(=O)C1CC(CC(C1)[N+]([O-])=O)C(=O)OC(C)C	TR	-5.0389	295.291	2.7252	74.1994	21	6	0	7	5	114	1	0	0	1	95.74	121.554	3.20222	524.333
844	CCCCNCC	TS	-0.4405	101.193	1.396	33.4517	7	1	1	1	4	44	0	0	0	0	12.03	46.1138	2.44747	23.361
845	CC(CCl)O[P](=O)(OC(C)CCl)OC(C)CCl	TR	-2.4361	327.572	4.0262	71.4075	17	4	0	8	9	104	0	0	0	0	44.76	117.459	4.61672	216.356
846	CCN(CC)C(=O)C(C)OC1CCCC2CCCCC12	TR	-3.5702	271.36	3.4755	81.966	20	2	0	3	5	106	2	0	0	2	29.54	119.703	2.21587	585.065
847	CSC1nCC2nCCnC2n1	TR	-1.7561	178.22	1.1417	46.909	12	5	0	5	1	60	2	0	0	2	51.56	73.4797	2.674	403.283
848	CC1NC2CC(Cl)C(CC2C(=O)N1C3CCCCC3C)[S](N)(=O)=O	TR	-3.783	365.842	2.71412	93.8984	24	4	2	8	2	126	2	0	1	3	92.5	144.818	2.16741	943.579
849	CC(C)(C)NCC(O)C1CCC(O)C(CO)C1	TS	-1.2298	239.315	1.306	66.7451	17	4	4	4	4	96	1	0	0	1	72.72	101.919	2.72021	371.418
850	CCCCCC(O)CC	V	-2.0171	130.231	2.3376	40.4398	9	1	1	1	5	56	0	0	0	0	20.23	58.0881	2.87662	52.5293
851	CC(O)C(O)C1CnC2NC(=NC(=O)C2n1)N	TR	-2.5301	237.219	-1.2905	59.0067	17	7	4	8	2	90	2	0	0	2	138.01	95.1764	2.61947	609.093
852	CNC(=O)OC1CCCC2OC(C)(C)OC12	TR	-2.9338	223.228	1.9121	56.8607	16	4	1	5	1	86	1	0	1	2	56.79	93.3023	2.29808	427.993
853	CCO[P](=S)(OCC)OC1nCn(n1)C2CCCCC2	TR	-3.9049	313.319	2.9436	79.524	20	7	0	8	7	108	2	0	0	2	58.4	122.496	2.14509	580.643
854	CCCCCC1C(CCC1=O)CC(=O)OC	TR	-2.9076	226.316	2.7251	61.996	16	3	0	3	6	92	0	1	1	1	43.37	97.5493	2.42258	247.562
855	CNC(=O)N(C)C1sC(nn1)C(F)(F)F	TR	-2.0584	240.21	1.3325	47.7697	15	4	1	9	1	84	1	0	0	1	58.12	86.9071	2.89463	363.504
856	CNC1=C(Cl)C(=O)N(N=C1)C2CCCC(C2)C(F)(F)F	TR	-3.9548	303.671	2.9464	69.3927	20	4	1	8	2	106	2	0	0	2	46.92	116.347	2.58486	697.077
857	CC(C)=CC1C(C(=O)OCC2CoC(CC3CCCCC3)C2)C1(C)C	TS	-6.0524	338.447	5.152	97.944	25	3	0	3	6	132	2	1	1	3	39.44	149.242	1.54221	763.58
858	CC(C)NCC(O)COC1CCC(CC(N)=O)CC1	TR	-1.3016	266.341	0.4521	73.9809	19	4	3	5	8	106	1	0	0	1	84.58	113.31	2.3462	390.182
859	CCCCC(C)C(C)O	TR	-2.0578	130.231	2.1935	40.3698	9	1	1	1	4	56	0	0	0	0	20.23	58.0881	3.15528	59.588
860	ClC1CC(Cl)CC(C1)C2CC(Cl)CC(Cl)C2	TR	-8.3748	291.992	5.9672	71.918	16	0	0	4	1	82	2	0	0	2	0	113.702	2.57491	444.537
861	CCCN(CCC)C1C(CC(CC1[N+]([O-])=O)C(C)C)[N+]([O-])=O	TR	-6.4491	309.366	4.2528	86.6348	22	5	0	7	8	122	1	0	0	1	89.52	129.782	3.62105	516.714
862	CC(C)NC(=O)N1CC(=O)N(C1=O)C2CC(Cl)CC(Cl)C2	TR	-4.3757	330.171	2.88	79.7177	21	3	1	8	2	112	1	1	1	2	69.72	131.141	2.27951	598.429
863	ClC1CC2OC3C(Cl)C(Cl)C(Cl)C(Cl)C3OC2C(Cl)C1Cl	TR	-11.4795	425.309	8.1584	88.102	21	2	0	9	0	110	2	0	1	3	18.46	153.833	2.27127	788.396
864	ClC1CCC(Cl)C(C1Cl)C2CC(Cl)C(Cl)CC2Cl	TR	-7.93	360.882	7.274	81.938	18	0	0	6	1	94	2	0	0	2	0	134.308	2.77075	620.45
865	ClC1CCC(CC1Cl)C2CC(Cl)C(Cl)C(Cl)C2Cl	TS	-7.8306	360.882	7.274	81.938	18	0	0	6	1	94	2	0	0	2	0	134.308	2.67496	620.45
866	CCC(CC)NC1C(CC(C)C(C)C1[N+]([O-])=O)[N+]([O-])=O	TS	-5.9721	281.312	3.72034	77.2175	20	5	1	7	6	110	1	0	0	1	98.31	116.842	3.53946	538.908
867	CCO[P](=S)(OCC)OC1nn(C(C)C)C(Cl)n1	TR	-3.6577	313.747	3.1887	73.582	18	7	0	9	7	104	1	0	0	1	58.4	116.837	2.87506	430.692
868	COC(=O)C1CC(OC2CCC(Cl)CC2Cl)CCC1[N+]([O-])=O	TR	-5.9343	342.134	4.4805	80.9719	22	5	0	8	4	114	2	0	0	2	78.67	134.867	2.39902	748.008
869	CCOC1CC(OC2CCC(CC2Cl)C(F)(F)F)CCC1[N+]([O-])=O	TS	-6.4939	361.703	5.458	80.7934	24	4	0	9	5	128	2	0	0	2	61.6	139.263	2.31039	764.87
870	CC(C)OC(=O)C(C(=O)OC(C)C)=C1SCCS1	TR	-3.7306	290.406	2.5812	74.398	18	6	0	6	4	102	0	1	1	1	52.6	115.855	2.91816	329.089
871	CN=C(NCCSCC1nC[nH]C1C)NC#N	TR	-1.4298	252.347	0.5974	69.5971	17	4	3	7	5	92	1	0	0	1	88.89	104.926	2.13094	405.174
872	ClC1CC(Cl)C(Cl)C(C1)C2CC(Cl)C(Cl)CC2Cl	V	-8.5801	360.882	7.274	81.938	18	0	0	6	1	94	2	0	0	2	0	134.308	2.72886	620.45
873	ClC1CCCC(C1Cl)C2CCC(Cl)C(Cl)C2Cl	V	-7.0502	326.437	6.6206	76.928	17	0	0	5	1	88	2	0	0	2	0	124.005	2.69495	577.349
874	ClC1CCC(C(Cl)C1Cl)C2C(Cl)CC(Cl)C(Cl)C2Cl	TR	-8.2605	395.327	7.9274	86.948	19	0	0	7	1	100	2	0	0	2	0	144.611	2.80285	663.858
875	ClC1CC(Cl)C(CC1Cl)C2CC(Cl)C(Cl)C(Cl)C2	V	-8.21	360.882	7.274	81.938	18	0	0	6	1	94	2	0	0	2	0	134.308	2.65794	597.2
876	ClC1CCCC(C1Cl)C2C(Cl)C(Cl)CC(Cl)C2Cl	TR	-8.6036	360.882	7.274	81.938	18	0	0	6	1	94	2	0	0	2	0	134.308	2.82752	594.2
877	CC(C)(C)C(O)C(OC1CCC(Cl)CC1)n2CnCn2	TR	-3.3918	295.77	2.9161	76.6008	20	5	1	6	4	108	2	0	0	2	60.17	122.716	2.25563	534.547
878	CC1=C(C)[S](=O)(=O)CC[S]1(=O)=O	V	-1.66	210.276	0.081	45.9476	12	4	0	6	0	70	0	0	1	1	68.28	72.1193	3.49766	382.169
879	ClC1CCCCC1C2CC(Cl)C(Cl)C(Cl)C2Cl	TR	-7.5226	326.437	6.6206	76.928	17	0	0	5	1	88	2	0	0	2	0	124.005	2.7337	577.349
880	OC(=O)COC1nC(Cl)C(Cl)CC1Cl	TR	-2.7656	256.472	2.5052	52.3978	14	3	1	7	3	76	1	0	0	1	59.42	94.36	2.86663	369.443
881	CN1CC(O)N(C1=O)C2sC(nn2)C(C)(C)C	TR	-1.8773	256.331	1.0258	65.1208	17	5	1	7	1	94	1	1	1	2	69.56	103.869	2.29371	439.759
882	CC(C)C(O)(C1CCC(OC(F)(F)F)CC1)C2CnCnC2	TS	-3.4377	312.291	3.2671	72.9938	22	4	1	7	4	118	2	0	0	2	55.24	125.157	2.38338	614.935
883	CO[P](=S)(OC)OC1C(Cl)CC(C)CC1Cl	TR	-5.4374	301.131	4.19792	70.13	16	4	0	7	4	90	1	0	0	1	27.69	109.853	3.10855	407.757
884	ClC1CC2oC3C(Cl)C(Cl)C(Cl)CC3C2CC1Cl	TR	-9.1609	340.42	6.853	78.77	18	1	0	6	0	92	3	0	0	3	13.14	127.105	2.56018	790.348
885	CSC(/C)=N/OC(=O)N(C)SN(C)C(=O)O\N=C(/C)SC	TR	-4.0055	354.479	3.0792	89.327	21	9	0	11	4	120	0	0	0	0	83.8	136.432	4.33232	392.526
886	ClC1CCC(C(Cl)C1)C2CCC(Cl)C(Cl)C2Cl	TS	-7.62	326.437	6.6206	76.928	17	0	0	5	1	88	2	0	0	2	0	124.005	2.64951	577.349
887	S=C1N=CNC2nCCnC12	TR	-2.6471	164.193	1.08239	42.5177	11	4	1	5	0	54	2	0	0	2	54.46	67.3504	3.03079	430.28
888	CC(C)OC1CCCC(NC(=O)C2CCCCC2C(F)(F)F)C1	V	-4.6947	323.314	4.7449	81.6032	23	2	1	6	4	122	2	0	0	2	38.33	131.635	2.23462	696.233
889	CC(C)C(NC1CCC(CC1Cl)C(F)(F)F)C(=O)OC(C#N)C2CCCC(OC3CCCCC3)C2	TR	-8.0025	502.92	7.39568	126.107	35	5	1	9	8	182	3	0	0	3	71.35	205.596	1.75427	1210.45
890	COC(=O)C1CC(C)CCC1C2=NC(C)(C(C)C)C(=O)N2	V	-2.3262	288.347	2.07272	80.4412	21	4	1	5	3	112	1	0	1	2	67.76	123.957	2.53535	634.409
891	ClC1CCCCC1C2CC(Cl)C(Cl)CC2Cl	TR	-7.2505	291.992	5.9672	71.918	16	0	0	4	1	82	2	0	0	2	0	113.702	2.65331	534.537
892	ClC1CCCCC1C2CC(Cl)C(Cl)C(Cl)C2	TS	-6.9069	291.992	5.9672	71.918	16	0	0	4	1	82	2	0	0	2	0	113.702	2.6195	511.287
893	CCOC(=O)NCCOC1CCC(OC2CCCCC2)CC1	V	-4.7009	301.342	3.6038	83.4777	22	4	1	5	7	116	2	0	0	2	56.79	129.365	1.73729	568.973
894	COC(=O)C1CCCCC1[S](=O)(=O)NC(=O)NC2nC(C)CC(C)n2	TS	-3.1742	364.383	1.39044	88.6277	25	7	2	10	4	132	2	0	0	2	127.35	144.05	2.23976	907.019
895	ClC1CCC(CC1)C2CC(Cl)C(Cl)C(Cl)C2Cl	TR	-7.3102	326.437	6.6206	76.928	17	0	0	5	1	88	2	0	0	2	0	124.005	2.63774	560.099
896	COC(=O)C1sCCC1[S](=O)(=O)NC(=O)NC2nC(C)nC(OC)n2	V	-2.2379	387.399	0.54712	86.1147	25	10	2	13	5	134	2	0	0	2	149.47	146.023	2.18504	910.47
897	CCOC1CCC(CC1)C(C)(C)COCC2CCCC(OC3CCCCC3)C2	TS	-8.5758	376.496	6.372	113.251	28	3	0	3	9	146	3	0	0	3	27.69	167.441	1.55456	854.476
898	COC(=O)C1CCC(C)CC1C2=NC(C)(C(C)C)C(=O)N2	TR	-2.4599	288.347	2.07272	80.4412	21	4	1	5	3	112	1	0	1	2	67.76	123.957	2.55099	634.409
899	CCC(C)(CC)C1CC(NC(=O)C2C(OC)CCCC2OC)on1	TR	-5.3694	332.4	4.0218	91.9362	24	5	1	6	7	130	2	0	0	2	73.59	141.677	2.27149	682.544
900	FC1CCCC(F)C1C(=O)NC(=O)NC2CC(Cl)C(F)C(Cl)C2F	TR	-7.3023	381.112	4.5117	79.2209	24	2	2	10	2	126	2	0	0	2	58.2	141.91	2.18851	825.76
901	CCC1nC2CnC(O)nC2nC1CC	TR	-2.2644	204.233	1.2502	55.5488	15	5	1	5	2	78	2	0	0	2	71.79	87.2457	2.69384	497.992
902	CC1CCn2nC(nC2n1)[S](=O)(=O)NC3C(F)CCCC3F	TR	-3.8248	325.3	1.51172	72.6855	22	6	1	10	3	114	3	0	0	3	89.25	123.241	2.04544	950.557
903	CC(CCC(O)=O)NC(=O)C1CCCCC1	TR	-1.6917	221.256	1.6697	60.24	16	2	2	4	5	86	1	0	0	1	66.4	94.2882	2.42592	361.786
904	COC(=O)CSC1CC(N=C2SC(=O)N3CCCCN23)C(F)CC1Cl	TR	-5.6768	403.888	2.7951	95.176	25	8	0	10	4	134	2	0	1	3	65.59	155.429	2.00124	935.078
905	FC1(F)OC2CCCC(C2O1)C3C[nH]CC3C#N	TS	-5.1395	248.188	2.87488	57.1467	18	3	1	6	1	90	2	0	1	3	58.04	100.372	2.17402	658.337
906	CC(C)C(C)C	TS	-3.5832	86.178	2.2984	29.676	6	0	0	0	1	38	0	0	0	0	0	40.564	2.9935	21.0196
907	CCCCCCC	TR	-4.4694	100.205	2.9767	34.433	7	0	0	0	4	44	0	0	0	0	0	46.9289	2.44747	19.2193
908	C1CCC2C(C1)CC3CCC4CCCC5CCC2C3C45	TS	-8.1924	252.316	5.7372	87.652	20	0	0	0	0	92	5	0	0	5	0	116.137	2.23084	1069.72
909	C1CCC2C(C1)CCC3CC4C(CCC5CCCCC45)CC23	TR	-8.6679	278.354	6.2994	96.466	22	0	0	0	0	102	5	0	0	5	0	128.158	2.01943	1070.8
910	CC1CCC2CC3C(CCC4CCCCC34)C5CCC1C25	V	-7.9663	268.359	5.55322	91.105	21	0	0	0	0	100	4	0	1	5	0	123.565	2.07952	1038.13
911	C1CCC2CC3C(CCC4CCCCC34)CC2C1	TR	-7.3854	228.294	5.1462	78.96	18	0	0	0	0	84	4	0	0	4	0	105.476	2.26827	866.253
912	C1CCC2C(C1)CCC3CCCCC23	TS	-5.1903	178.234	3.993	61.454	14	0	0	0	0	66	3	0	0	3	0	82.7947	2.61032	539.009
913	s1C2CCCCC2C3CCCCC13	V	-5.0981	184.263	4.0545	59.331	13	1	0	1	0	62	3	0	0	3	0	80.4351	2.64244	512.884
914	C1CC2CCCC3C=CC(C1)C23	TS	-3.9756	152.196	3.3236	52.876	12	0	0	0	0	56	2	0	1	3	0	71.1475	2.64273	437.612
915	C1CCC2C(C1)C3CCCCC3C4CCCCC24	TR	-6.7447	228.294	5.1462	78.96	18	0	0	0	0	84	4	0	0	4	0	105.476	2.46301	651.536
916	C1C2CCCCC2C3CC4CCCCC4CC13	TR	-7.733	216.283	4.411	72.19	17	0	0	0	0	80	3	0	1	4	0	100.529	2.07429	722.94
917	CC1CCC2CC3CCCCC3CC2C1	TR	-6.9555	192.261	4.30142	66.191	15	0	0	0	0	72	3	0	0	3	0	89.1597	2.47494	635.657
918	CC(C)C1CCCCC1	V	-3.2924	120.195	2.81	40.531	9	0	0	0	1	48	1	0	0	1	0	56.5262	2.84823	162.653
919	CC1CC(C)C(C)C(C)C1C	TR	-3.9807	148.249	3.2287	50.127	11	0	0	0	0	60	1	0	0	1	0	69.2561	3.45555	256.33
920	CCCCCCC1CCCCC1	TR	-5.2551	162.276	3.8094	54.288	12	0	0	0	5	66	1	0	0	1	0	75.6211	2.1578	188.453
921	[O-][N+](=O)C1C(Cl)C(Cl)CC(Cl)C1Cl	TR	-5.0963	260.891	4.2084	53.1364	13	2	0	7	1	70	1	0	0	1	43.14	93.2974	3.55514	353.137
922	ClC1CCC(Cl)C(Cl)C1Cl	V	-4.5619	215.894	4.3002	46.482	10	0	0	4	0	54	1	0	0	1	0	78.6445	3.34215	229.17
923	CN(C)C	TR	1.1777	59.112	0.1778	19.611	4	1	0	1	0	26	0	0	0	0	3.24	27.229	2.32379	8
924	N(C1CCCCC1)C2CCCCC2	TS	-3.5042	169.227	3.4302	56.1667	13	1	1	1	2	64	2	0	0	2	12.03	78.0384	2.16148	315.899
925	COC1CCC(C=O)CC1	TR	-1.5016	136.15	1.5077	38.3815	10	2	0	2	2	52	1	0	0	1	26.3	59.4364	2.89535	213.204
926	OC1C(Cl)C(Cl)C(Cl)C(Cl)C1Cl	TR	-4.2793	266.338	4.6592	53.1568	12	1	1	6	0	66	1	0	0	1	20.23	93.742	3.60357	230.203
927	CC1CCC(O)C(C)C1	TS	-1.191	122.167	2.00904	37.5808	9	1	1	1	0	48	1	0	0	1	20.23	54.9555	3.17168	215.808
928	OC1CCC(Br)CC1	TR	-1.092	173.009	2.1547	35.8068	8	1	1	2	0	42	1	0	0	1	20.23	56.0932	3.03246	147.388
929	COC1CCC(O)CC1	V	-0.4919	124.139	1.4008	34.6588	9	2	1	2	1	48	1	0	0	1	29.46	53.7041	2.88156	178.613
930	OC1CCCC(Cl)C1Cl	TR	-1.6559	163.003	2.699	38.1268	9	1	1	3	0	48	1	0	0	1	20.23	62.8322	3.24783	202.048
931	OC1CC(Cl)CC(Cl)C1	TR	-1.559	163.003	2.699	38.1268	9	1	1	3	0	48	1	0	0	1	20.23	62.8322	3.16567	171.82
932	OC1CCC(Br)CC1Br	TR	-2.1225	251.905	2.9172	43.5068	9	1	1	3	0	48	1	0	0	1	20.23	69.9607	3.17168	222.298
933	CC(C)C(O)=O	TS	0.2777	88.106	0.727	22.4738	6	1	1	2	1	36	0	0	0	0	37.3	36.7898	3.25759	56.5684
934	OC(=O)CC1C[nH]C2CCCCC12	TS	-2.0674	175.187	1.795	49.6385	13	1	2	3	2	66	2	0	0	2	53.09	75.0079	2.51396	444.876
935	CC1CC(Cl)CCC1OCC(O)=O	TR	-2.503	200.621	2.11182	49.3198	13	2	1	4	3	70	1	0	0	1	46.53	80.8988	2.71944	322.636
936	CCCCCCCCCCC(O)=O	TR	-3.5525	186.295	3.6018	54.8628	13	1	1	2	9	78	0	0	0	0	37.3	81.3444	2.87292	121.259
937	OC(=O)COC1CCCCC1	TS	-1.1031	152.149	1.15	39.5728	11	2	1	3	3	58	1	0	0	1	46.53	64.2306	2.45302	230.352
938	OC(=O)COC1CCC(Cl)CC1	TS	-2.29	186.594	1.8034	44.5828	12	2	1	4	3	64	1	0	0	1	46.53	74.5339	2.52989	268.136
939	OC(=O)\C=C\C1CCCCC1	TR	-2.4335	148.161	1.7844	43.1118	11	1	1	2	2	56	1	0	0	1	37.3	64.7924	2.72177	262.151
940	CCCCC(CC)C(O)=O	V	-1.858	144.214	2.2874	40.9418	10	1	1	2	5	60	0	0	0	0	37.3	62.2496	3.50036	99.4307
941	COC1CCC(\C=C\C(O)=O)CC1	V	-2.3984	178.187	1.793	49.6638	13	2	1	3	3	68	1	0	0	1	46.53	76.2709	2.74694	311.447
942	OC(=O)C1CCC(Cl)C(Cl)C1	TR	-3.495	191.013	2.6916	43.4213	11	1	1	4	1	58	1	0	0	1	37.3	73.3586	3.15155	296.492
943	OC(=O)C1oCCC1	TR	-0.4802	112.084	0.9778	25.6673	8	2	1	3	1	42	1	0	0	1	50.44	45.5464	2.92838	175.564
944	OC(=O)C1CCCCC1I	V	-2.7308	248.019	1.9894	46.1183	10	1	1	3	1	52	1	0	0	1	37.3	72.0139	3.15294	257.538
945	OC(=O)C1CCC2CCCCC2C1	TS	-3.5639	172.183	2.538	50.9073	13	1	1	2	1	64	2	0	0	2	37.3	75.4338	2.68603	460.352
946	CC1CCCC(C1)C(O)=O	TR	-2.1428	136.15	1.69322	38.1383	10	1	1	2	1	52	1	0	0	1	37.3	59.117	3.0699	253.189
947	COC1CCC(CC1)C(O)=O	TS	-2.458	152.149	1.3934	39.9533	11	2	1	3	2	58	1	0	0	1	46.53	64.2306	2.9138	250.545
948	CC1CCCCC1C(O)=O	TS	-2.0621	136.15	1.69322	38.1383	10	1	1	2	1	52	1	0	0	1	37.3	59.117	3.15294	253.189
949	OC(=O)C1CCCC(Cl)C1	V	-2.5415	156.568	2.0382	38.4113	10	1	1	3	1	52	1	0	0	1	37.3	63.0554	3.0699	257.538
950	OC(=O)C1CCCC(Br)C1	TR	-2.699	201.019	2.1473	41.1013	10	1	1	3	1	52	1	0	0	1	37.3	66.6196	3.0699	257.538
951	OC(=O)C1CCC(Br)CC1	TS	-3.5251	201.019	2.1473	41.1013	10	1	1	3	1	52	1	0	0	1	37.3	66.6196	3.0034	240.288
952	OC(=O)C1CCCC(I)C1	V	-3.2706	248.019	1.9894	46.1183	10	1	1	3	1	52	1	0	0	1	37.3	72.0139	3.0699	257.538
953	OC(=O)C1CCC(I)CC1	TR	-3.9631	248.019	1.9894	46.1183	10	1	1	3	1	52	1	0	0	1	37.3	72.0139	3.0034	240.288
954	CCC(C)O	TR	0.3877	74.123	0.7772	21.9718	5	1	1	1	1	32	0	0	0	0	20.23	32.6283	2.53954	17.6096
955	OC(C1CCCCC1)C2CCCCC2	TR	-2.5494	184.238	2.7683	56.9458	14	1	1	1	2	70	2	0	0	2	20.23	83.6477	2.29625	340.995
956	OCC1CCCCC1	TR	-0.4319	108.14	1.1789	32.3648	8	1	1	1	1	42	1	0	0	1	20.23	48.5906	2.83209	145.733
957	OC1CCCCC1	V	-0.3774	100.161	1.3114	29.0918	7	1	1	1	0	42	0	1	1	1	20.23	44.3524	2.12292	46.1417
958	CCCCCCCO	TS	-1.8425	116.204	1.9491	35.8448	8	1	1	1	5	50	0	0	0	0	20.23	51.7231	2.53006	29.3681
959	OCCCC1CCCCC1	TR	-1.3798	136.194	1.6115	41.8488	10	1	1	1	3	54	1	0	0	1	20.23	61.3205	2.42652	169.343
960	CCCCCCC(C)O	TR	-2.0655	130.231	2.3376	40.4398	9	1	1	1	5	56	0	0	0	0	20.23	58.0881	2.74669	50.5293
961	CCCCC(C)O	TR	-0.8726	102.177	1.5574	31.2058	7	1	1	1	3	44	0	0	0	0	20.23	45.3582	2.67826	33.1613
962	CBr	TR	-0.7956	94.939	1.0111	14.851	2	0	0	1	0	14	0	0	0	0	0	22.6068	1	2
963	FC(F)F	TS	-1.2334	70.013	1.1785	7.112	4	0	0	3	0	26	0	0	0	0	0	21.2359	2.32379	8
964	ClC(Cl)C(Cl)(Cl)Cl	TR	-2.6248	202.295	3.1603	35.784	7	0	0	5	0	44	0	0	0	0	0	66.6205	3.5412	51.5907
965	ClC(Cl)C(Cl)Cl	TR	-1.7536	167.85	2.5938	30.988	6	0	0	4	1	38	0	0	0	0	0	56.3173	2.9935	26.5293
966	O=CC1CCC2OCOC2C1	TR	-1.6324	150.133	1.2278	37.9525	11	3	0	3	1	56	1	0	1	2	35.53	63.5441	2.48339	293.389
967	CCOC(=O)C(C)=C	TR	-1.3251	114.144	1.1256	31.447	8	2	0	2	2	46	0	0	0	0	26.3	49.1494	3.49045	105.096
968	CC(C)COC(=O)C(C)=C	TR	-2.039	142.198	1.7617	40.611	10	2	0	2	3	58	0	0	0	0	26.3	61.8793	3.50299	136.193
969	CCOC(=O)CC(C)=O	V	-0.073	130.143	0.5286	31.931	9	3	0	3	3	52	0	0	0	0	43.37	54.0006	3.38692	117.471
970	CCC(=O)CC	TR	-0.253	86.134	1.3755	25.589	6	1	0	1	2	36	0	0	0	0	17.07	38.3605	2.98816	41.9001
971	CC(C)C(C)=O	TS	-0.1513	86.134	1.2314	25.519	6	1	0	1	1	36	0	0	0	0	17.07	38.3605	3.25759	54.9588
972	CCCC#N	TS	-0.321	69.107	1.31008	20.521	5	1	0	1	1	28	0	0	0	0	23.79	32.2267	2.4837	42.0999
973	ClC1CCCC(Cl)C1C#N	TR	-3.9803	172.014	2.86508	41.177	10	1	0	3	0	50	1	0	0	1	23.79	68.7955	3.34277	267.898
974	C1C=CC=CC=C1	TR	-2.1721	92.141	2.0587	32.037	7	0	0	0	0	36	0	0	1	1	0	43.8543	2.60095	102
975	C1C=CCC=C1	TR	-2.0587	80.13	1.8926	27.514	6	0	0	0	0	32	0	0	1	1	0	38.1789	2.4	58.0391
976	S=C1NCCN1	TR	-0.7083	102.162	-0.5359	28.6034	6	1	2	3	0	34	0	1	1	1	24.06	41.9218	2.36735	63.1934
977	CC1CCCC2CCCCC12	TS	-3.7413	142.201	3.14822	48.685	11	0	0	0	0	54	2	0	0	2	0	66.478	2.91316	369.2
978	ClC1CCCC2CCCCC12	V	-3.9706	162.619	3.4932	48.958	11	0	0	1	0	54	2	0	0	2	0	70.4163	2.91316	374.034
979	CC1CCC2CC(C)CCC2C1	TR	-4.8927	156.228	3.45664	53.422	12	0	0	0	0	60	2	0	0	2	0	72.843	2.78665	372.058
980	O1C2CCCCC2OC3CCCCC13	TR	-5.3106	184.194	3.5846	53.032	14	2	0	2	0	68	2	0	1	3	18.46	81.7098	2.12492	389.753
981	ClC1CCC2OC3CCCCC3OC2C1	TR	-5.8359	218.639	4.238	58.042	15	2	0	3	0	74	2	0	1	3	18.46	92.013	2.10861	522.781
982	CC1CCCCC1[N+]([O-])=O	V	-2.3243	137.138	1.90322	37.8334	10	2	0	3	1	52	1	0	0	1	43.14	58.4493	3.15294	257.538
983	[O-][N+](=O)C1CCCC(C1)[N+]([O-])=O	TS	-2.4989	168.108	1.503	39.7508	12	4	0	6	2	62	1	0	0	1	86.28	66.7374	3.12181	306.825
984	CC1C(CC(CC1[N+]([O-])=O)[N+]([O-])=O)[N+]([O-])=O	V	-3.2423	227.132	1.71962	51.1422	16	6	0	9	3	84	1	0	0	1	129.42	87.7553	3.57275	461.891
985	CCOC(N)=O	V	0.7314	89.094	0.1016	21.2094	6	2	1	3	1	36	0	0	0	0	52.32	36.0841	2.83126	52.7549
986	NC(=O)C=C	V	0.9544	71.079	-0.3423	19.3914	5	1	1	2	1	28	0	0	0	0	43.09	30.2809	3.20481	57.9134
987	CCOCC	V	-0.0889	74.123	1.0428	22.167	5	1	0	1	2	32	0	0	0	0	9.23	32.9476	2.19061	11.1194
988	CCCOCCC	V	-1.3192	102.177	1.823	31.401	7	1	0	1	4	44	0	0	0	0	9.23	45.6775	2.44747	23.361
989	ClC1CCC(CC1)C2CCC(Cl)CC2	TR	-6.5561	223.102	4.6604	61.898	14	0	0	2	1	70	2	0	0	2	0	93.095	2.39651	371.58
990	ClC1CCCCC1C2CCCCC2	TS	-4.5917	188.657	4.007	56.888	13	0	0	1	1	64	2	0	0	2	0	82.7918	2.53607	392.879
991	ClC1CCCCC1C2CCCCC2Cl	TR	-5.0813	223.102	4.6604	61.898	14	0	0	2	1	70	2	0	0	2	0	93.095	2.60885	406.08
992	ClC1CCCC(Cl)C1C2C(Cl)CCCC2Cl	TR	-7.3898	291.992	5.9672	71.918	16	0	0	4	1	82	2	0	0	2	0	113.702	2.77315	444.537
993	ClC1CCC(CC1Cl)C2CC(Cl)C(Cl)CC2Cl	V	-7.3867	326.437	6.6206	76.928	17	0	0	5	1	88	2	0	0	2	0	124.005	2.59887	577.349
994	ClC1CCC(C(Cl)C1)C2CCC(Cl)C(Cl)C2	TS	-6.8995	291.992	5.9672	71.918	16	0	0	4	1	82	2	0	0	2	0	113.702	2.54314	534.537
995	ClC1CCC(Cl)C(C1)C2CCC(Cl)C(Cl)C2	V	-6.8526	291.992	5.9672	71.918	16	0	0	4	1	82	2	0	0	2	0	113.702	2.57948	534.537
996	ClC1CCC(C(Cl)C1)C2CCCCC2	TR	-5.2878	223.102	4.6604	61.898	14	0	0	2	1	70	2	0	0	2	0	93.095	2.5278	435.33
997	ClC1CCC(Cl)C(C1)C2CCCCC2	TS	-5.2993	223.102	4.6604	61.898	14	0	0	2	1	70	2	0	0	2	0	93.095	2.56584	435.33
998	ClC1CCC(CC1)C2CCCCC2Cl	V	-5.2803	223.102	4.6604	61.898	14	0	0	2	1	70	2	0	0	2	0	93.095	2.49825	432.33
999	ClC1CCC(C(Cl)C1Cl)C2CC(Cl)C(Cl)CC2Cl	V	-8.3813	360.882	7.274	81.938	18	0	0	6	1	94	2	0	0	2	0	134.308	2.69905	620.45
1000	ClC1CCC(Cl)C(C1)C2CC(Cl)C(Cl)CC2Cl	TR	-7.3263	326.437	6.6206	76.928	17	0	0	5	1	88	2	0	0	2	0	124.005	2.67795	577.349
1001	ClC1CCC(Cl)C(C1Cl)C2C(Cl)CCC(Cl)C2Cl	TS	-7.9032	360.882	7.274	81.938	18	0	0	6	1	94	2	0	0	2	0	134.308	2.85465	564.95
1002	ClC1CCC(CC1)C2C(Cl)CCCC2Cl	TR	-6.2095	257.547	5.3138	66.908	15	0	0	3	1	76	2	0	0	2	0	103.398	2.58409	454.476
1003	ClC1CCC(CC1Cl)C2CCCCC2Cl	TS	-6.287	257.547	5.3138	66.908	15	0	0	3	1	76	2	0	0	2	0	103.398	2.551	491.976
1004	ClC1CCC(CC1)C2CCC(Cl)C(Cl)C2	TR	-6.5541	257.547	5.3138	66.908	15	0	0	3	1	76	2	0	0	2	0	103.398	2.4528	474.726
1005	ClC1CCC(Cl)C(C1)C2CCCC(Cl)C2Cl	TS	-6.4654	291.992	5.9672	71.918	16	0	0	4	1	82	2	0	0	2	0	113.702	2.67138	534.537
1006	ClC1CCCC(C1Cl)C2CC(Cl)C(Cl)C(Cl)C2Cl	TR	-8.4206	360.882	7.274	81.938	18	0	0	6	1	94	2	0	0	2	0	134.308	2.76063	620.45
1007	CC1=CC(=O)C2CCCCC2C1=O	TR	-3.0319	172.183	2.0119	48.86	13	2	0	2	0	64	1	0	1	2	34.14	75.8837	2.69039	427.471
1008	C1CCC(CC1)N=NC2CCCCC2	TS	-4.4544	182.226	4.102	57.06	14	2	0	2	2	68	2	0	0	2	24.72	82.9353	2.15934	365.352
1009	ClC1CCC(CC1)C(C2CCC(Cl)CC2)C(Cl)(Cl)Cl	TS	-7.8092	354.491	6.4955	85.037	19	0	0	5	2	100	2	0	0	2	0	136.735	2.47412	494.044
1010	CNC(=O)CS[P](=S)(OC)OC	TR	-0.9624	229.263	0.9829	54.8277	12	5	1	7	5	72	0	0	0	0	47.56	81.3024	3.8925	191.132
1011	OC(=O)COC1CCC(Cl)CC1Cl	TR	-2.5139	221.039	2.4568	49.5928	13	2	1	5	3	70	1	0	0	1	46.53	84.8371	2.71944	325.165
1012	CN(C)C(=O)NC1CCCCC1	TR	-1.6101	164.208	1.7801	49.1477	12	1	1	3	1	64	1	0	0	1	32.34	71.9974	2.58978	256.491
1013	OC(C1CCC(Cl)CC1)(C2CCC(Cl)CC2)C(Cl)(Cl)Cl	TR	-5.6657	370.49	5.5995	86.1928	20	1	1	6	2	106	2	0	0	2	20.23	141.529	2.62237	540.956
1014	CC(OC1CCC(Cl)CC1Cl)C(O)=O	TS	-2.8271	235.066	2.8453	54.1878	14	2	1	5	3	76	1	0	0	1	46.53	91.2021	2.81766	351.91
1015	CCO[P](=S)(OCC)SCSCC	TR	-3.7166	260.386	3.7277	68.127	13	5	0	6	8	80	0	0	0	0	18.46	94.4441	3.84593	155.817
1016	CON(C)C(=O)NC1CCC(Cl)C(Cl)C1	TS	-3.5213	249.097	3.0185	60.2527	15	2	1	6	2	82	1	0	0	1	41.57	97.6716	2.72969	371.13
1017	CCCCN(C)C(=O)NC1CCC(Cl)C(Cl)C1	TR	-4.7584	275.179	4.2572	73.0187	17	1	1	5	4	94	1	0	0	1	32.34	111.699	2.5796	396.092
1018	CCCCOC(N)=O	TR	-0.6571	117.148	0.8818	30.4434	8	2	1	3	3	48	0	0	0	0	52.32	48.814	2.82235	72.8289
1019	CCC(=O)NC1CCC(Cl)C(Cl)C1	TR	-2.9864	218.083	3.3419	55.3827	13	1	1	4	2	70	1	0	0	1	29.1	86.8441	2.79357	325.391
1020	CN(C)C(=O)NC1CCCC(C1)C(F)(F)F	TR	-3.4365	232.205	2.7989	54.1497	16	1	1	6	1	88	1	0	0	1	32.34	90.859	2.8752	387.896
1021	CCSC(=O)N1CCCCCC1	TR	-2.2858	187.308	2.7355	53.569	12	2	0	3	1	70	0	1	1	1	20.31	78.6974	2.31977	141.464
1022	CNC(=O)OC1CCCCC1C(C)C	TS	-2.6841	193.246	2.5282	55.6147	14	2	1	3	2	76	1	0	0	1	38.33	84.081	2.89726	320.818
1023	CO[P](=S)(OC)OC1CCC(SC2CCC(O[P](=S)(OC)OC)CC2)CC1	TR	-6.2375	466.479	5.63	114.869	27	9	0	11	10	148	2	0	0	2	55.38	173.513	2.00995	743.554
1024	CO[P]1(=S)OCC2CCCCC2O1	TR	-3.5714	216.198	2.4665	53.153	13	4	0	5	1	70	1	0	1	2	27.69	81.876	2.34753	366.162
1025	CCO[P](=S)(OCC)SCSC(C)(C)C	TR	-4.755	288.44	4.5063	77.339	15	5	0	6	7	92	0	0	0	0	18.46	107.174	4.01868	205.893
1026	CN(C)C(=O)NC1CCC(C)C(Cl)C1	TR	-3.4826	212.68	2.74192	58.8947	14	1	1	4	1	76	1	0	0	1	32.34	88.6657	2.78121	349.975
1027	CCO[P](=O)(NC(C)C)OC1CCC(SC)C(C)C1	TR	-2.9648	303.364	4.23832	81.0922	19	4	1	6	7	108	1	0	0	1	47.56	119.405	2.90188	465.202
1028	CCN(CC)C(=O)SCC1CCC(Cl)CC1	TR	-3.9641	257.786	4.035	71.064	16	2	0	4	4	88	1	0	0	1	20.31	105.969	2.44924	335.377
1029	CSSC	TS	-1.4969	94.204	1.6274	27.03	4	2	0	2	1	26	0	0	0	0	0	34.7504	1.97474	6
1030	CC1CCCnC1C	TR	0.0938	107.156	1.69844	33.711	8	1	0	1	0	42	1	0	0	1	12.89	49.3809	3.13486	160.497
1031	CC1CCnC(C)C1	TS	0.4471	107.156	1.69844	33.711	8	1	0	1	0	42	1	0	0	1	12.89	49.3809	3.07766	164.247
1032	CC1CCC(C)nC1	TS	-0.03	107.156	1.69844	33.711	8	1	0	1	0	42	1	0	0	1	12.89	49.3809	3.03246	143.247
1033	CC1CCnCC1C	V	-0.314	107.156	1.69844	33.711	8	1	0	1	0	42	1	0	0	1	12.89	49.3809	3.13486	160.497
1034	CC1CnCC(C)C1	V	-0.5115	107.156	1.69844	33.711	8	1	0	1	0	42	1	0	0	1	12.89	49.3809	3.07766	164.247
1035	C1CCC2C(C1)CCC3nCCCC23	TR	-3.3574	179.222	3.388	59.249	14	1	0	1	0	66	3	0	0	3	12.89	82.0144	2.61032	544.206
1036	C1CCC2CnCCC2C1	TS	-1.456	129.162	2.2348	41.743	10	1	0	1	0	48	2	0	0	2	12.89	59.3327	2.88805	275.705
1037	CCO[P](=S)(OCC)OC1CC(C)nC(n1)C(C)C	TR	-3.8813	304.352	3.58472	79.023	19	6	0	7	7	108	1	0	0	1	53.47	119.511	2.99038	458.288
1038	CCCCCCC1CCC(O)CC1O	TS	-2.5895	194.274	3.2206	57.6176	14	2	2	2	5	78	1	0	0	1	40.46	85.2095	2.42449	281.65
1039	CC\C(C1CCC(O)CC1)=C(\CC)C2CCC(O)CC2	V	-4.3495	268.356	4.8286	83.6096	20	2	2	2	4	104	2	0	0	2	40.46	119.577	2.52152	536.82
1040	NC1CCC(N)CC1	TS	-0.4658	108.144	0.851	35.2668	8	2	2	2	0	42	1	0	0	1	52.04	48.1112	3.03246	145.388
1041	ONC1CCCCC1	V	-0.4359	109.128	1.4877	31.8512	8	2	2	2	1	42	1	0	0	1	32.26	47.7295	2.83209	149.875
1042	CCCCOC(=O)N(C)SN(C)C(=O)OC1CCCC2CC(C)(C)OC12	TR	-4.5412	382.482	4.2624	100.25	26	6	0	8	6	144	1	0	1	2	68.31	158.382	1.92324	664.982
1043	CC(=O)O[Hg]C1CCCCC1	TR	-1.8868	336.74	0.8725	37.842	11	2	0	3	2	54	1	0	0	1	26.3	78.6605	2.45302	233.107
1044	CC(C)(C)C1CCC(OC2CCCCC2O[S](=O)OCC#C)CC1	TS	-5.8457	350.48	3.9192	95.8264	24	4	0	5	6	132	1	1	1	2	44.76	147.302	1.97623	582.87
1045	NC1C(Cl)CC(Cl)CC1Cl	V	-3.6912	196.464	3.229	45.8844	10	1	1	4	0	54	1	0	0	1	26.02	73.6811	3.31053	236.165
1046	OCC(C(O)=O)C1CCCCC1	TR	-0.9305	166.176	0.8471	43.9046	12	2	2	3	3	64	1	0	0	1	57.53	70.2762	2.8776	255.736
1047	FC(F)(F)C(Cl)Br	TS	-1.7043	197.381	2.5085	24.623	7	0	0	5	0	44	0	0	0	0	0	51.7716	3.5412	58.4455
1048	CC(=O)C1CCC(N)CC1	TR	-1.6058	135.166	1.4714	40.8589	10	2	1	2	1	52	1	0	0	1	43.09	59.6627	3.0034	237.939
1049	CN(C)C1nC(nC(n1)N(C)C)N(C)C	TR	-3.3638	210.285	0.0696	62.808	15	6	0	6	3	84	1	0	0	1	48.39	90.5595	3.20082	268.632
1050	NC(=S)NC1CCCCC1	V	-1.7898	152.222	1.3421	46.8501	10	1	2	3	1	52	1	0	0	1	38.05	65.0449	2.67424	220.308
1051	ClC1C(Cl)C(Cl)C2OC3C(Cl)C(Cl)C(Cl)C(Cl)C3OC2C1Cl	TR	-12.0605	459.754	8.8118	93.112	22	2	0	10	0	116	2	0	1	3	18.46	164.136	2.32089	697.842
1052	ClC1CC2OC3C(Cl)C(Cl)C(Cl)C(Cl)C3OC2CC1Cl	V	-10.9486	390.864	7.505	83.092	20	2	0	8	0	104	2	0	1	3	18.46	143.529	2.22697	681.703
1053	ClC1CC2oC3CC(Cl)C(Cl)CC3C2CC1Cl	TR	-8.6456	305.975	6.1996	73.76	17	1	0	5	0	86	3	0	0	3	13.14	116.802	2.511	682.92
1054	ClC1CCC2OC3C(Cl)C(Cl)C(Cl)CC3OC2C1	V	-8.8744	321.974	6.1982	73.072	18	2	0	6	0	92	2	0	1	3	18.46	122.923	2.16313	655.011
1055	CC(=O)NC1CCC(CC1)[S](N)(=O)=O	TS	-1.6066	214.246	0.2924	52.1189	14	3	2	6	2	76	1	0	0	1	89.26	81.9733	2.9519	436.159
1056	O=C1NNC(=O)C=C1	V	-1.2714	112.088	-0.9368	27.6834	8	2	2	4	0	42	1	0	0	1	65.72	44.1622	3.43647	219.362
1057	OCC(NC(=O)C(Cl)Cl)C(O)C1CCC(CC1)[N+]([O-])=O	TR	-2.1114	323.132	0.909	72.5667	20	5	3	9	6	110	1	0	0	1	112.7	123.815	2.82116	480.207
1058	CN(C)C1=C(C)N(C)N(C2CCCCC2)C1=O	TR	-0.6286	231.299	1.55042	70.074	17	4	0	4	2	90	2	0	0	2	30.17	100.687	2.73026	578.702
1059	OCCN1CCN(CCCN2C3CCCCC3SC4CCC(Cl)CC24)CC1	V	-4.1546	403.979	3.9427	113.606	27	5	1	6	6	144	2	1	2	4	29.95	170.261	1.41002	779.772
1060	CC(CN1C2CCCCC2SC3CCCCC13)N(C)C	V	-4.2597	284.428	4.2394	87.162	20	3	0	3	3	104	2	0	1	3	6.48	124.95	2.03157	563.944
1061	NC1CCC(CC1)[S](=O)(=O)NC2sCCn2	TS	-2.4248	255.324	1.5261	63.7769	16	5	2	7	3	84	2	0	0	2	85.08	96.999	2.28891	561.311
1062	Cn1CnC2N(C)C(=O)NC(=O)C12	TR	-2.7372	180.167	-1.0397	46.5757	13	5	1	6	0	68	2	0	0	2	72.68	72.454	3.17846	574.171
1063	O=C1NC(=O)C2CCCCC12	TS	-2.6114	147.133	0.5702	38.2387	11	2	1	3	0	54	1	0	1	2	46.17	63.0284	2.69468	310.7
1064	O=C1N=CN=C2NNC=C12	V	-2.3788	136.114	-0.4022	33.6254	10	3	2	5	0	50	0	0	2	2	74.43	55.4656	2.92959	362.191
1065	CC1onC(N[S](=O)(=O)C2CCC(N)CC2)C1	TR	-2.6183	253.283	1.36602	62.9029	17	5	2	7	3	90	2	0	0	2	98.22	98.4693	2.27673	616.501
1066	COC1CC(CC2CnC(N)nC2N)CC(OC)C1OC	TS	-2.8608	290.323	1.2576	79.7608	21	7	2	7	5	112	2	0	0	2	105.51	122.408	2.39756	621.107
1067	NC1CCCCC1O	V	-0.7369	109.128	0.9744	32.5192	8	2	2	2	0	42	1	0	0	1	46.25	47.5655	3.13486	164.638
1068	NC1CC(CC(C1O)[N+]([O-])=O)[N+]([O-])=O	TS	-2.4862	199.122	0.7908	45.828	14	6	2	8	2	74	1	0	0	1	132.53	76.8715	3.4275	416.173
1069	NC1CCCC(C1)[N+]([O-])=O	TR	-2.0611	138.126	1.177	37.5088	10	3	1	4	1	52	1	0	0	1	69.16	57.4243	3.0699	259.68
1070	NC1CCC(CC1)[N+]([O-])=O	TS	-2.2782	138.126	1.177	37.5088	10	3	1	4	1	52	1	0	0	1	69.16	57.4243	3.0034	242.43
1071	OC1CCC(CC1[N+]([O-])=O)[N+]([O-])=O	V	-2.5976	184.107	1.2086	41.4156	13	5	1	7	2	68	1	0	0	1	106.51	71.5316	3.26705	375.287
1072	CC1CCC(O)C(C1)[N+]([O-])=O	TS	-2.3837	153.137	1.60882	39.4982	11	3	1	4	1	58	1	0	0	1	63.37	63.2436	3.23221	295.737
1073	OC1CCC(C=O)CC1	TS	-0.9762	122.123	1.2047	33.4943	9	2	1	2	1	46	1	0	0	1	37.3	52.7521	3.00978	200.661
1074	NC1CCCC(C1)C(O)=O	TS	-1.3663	137.138	0.967	37.8137	10	2	2	3	1	52	1	0	0	1	63.32	58.092	3.0699	257.538
1075	NC1CC(Cl)CC(C(O)=O)C1Cl	TR	-2.4688	206.028	2.2738	47.8337	12	2	2	5	1	64	1	0	0	1	63.32	78.6985	3.37386	338.423
1076	NC1CCC(CC1)C(O)=O	TS	-1.3511	137.138	0.967	37.8137	10	2	2	3	1	52	1	0	0	1	63.32	58.092	3.0034	240.288
1077	CCCCOC(=O)C1CCC(O)CC1	V	-2.9723	194.23	2.3491	53.2973	14	3	1	3	4	76	1	0	0	1	46.53	83.3254	2.48107	289.906
1078	COC(=O)C1CCC(N)CC1	TS	-1.5974	151.165	1.0554	42.1939	11	3	1	3	1	58	1	0	0	1	52.32	64.7762	2.89535	253.299
1079	CCCCCOC(=O)C1CCC(N)CC1	TR	-3.3499	207.273	2.6158	60.6619	15	3	1	3	5	82	1	0	0	1	52.32	90.236	2.36749	305.903
1080	CCCCCCCOC(=O)C1CCC(N)CC1	TR	-4.6001	235.327	3.396	69.8959	17	3	1	3	7	94	1	0	0	1	52.32	102.966	2.18778	332.58
1081	COCOC	TS	0.506	76.095	0.2367	18.885	5	2	0	2	2	32	0	0	0	0	18.46	31.6962	2.19061	12.3645
1082	CC(=O)[C@H]1CC[C@H]2[C@@H]3CCC4=CC(=O)CC[C@]4(C)[C@H]3CC[C@]12C	TR	-4.5526	314.469	4.7235	90.881	23	2	0	2	1	126	0	3	4	4	34.14	139.648	1.6696	588.649
1083	C[C@]12CC[C@H]3[C@@H](CCC4=CC(=O)CC[C@]34C)[C@@H]1CC[C@@H]2O	TS	-4.0908	288.431	3.8792	82.7168	21	2	1	2	0	116	0	3	4	4	37.3	127.551	1.68835	507.696
1084	C[C@]12CC[C@H]3[C@@H](CCC4=CC(=O)CC[C@]34C)[C@@H]1CCC2=O	TR	-3.6949	286.415	4.0874	81.717	21	2	0	2	0	114	0	3	4	4	34.14	126.918	1.70381	545.77
1085	FC1=CNC(=O)NC1=O	TS	-1.0689	130.078	-0.7977	27.6414	9	2	2	5	0	48	1	0	0	1	65.72	48.3593	3.5239	312.834
1086	CC1=CNC(=O)NC1=O	V	-1.5187	126.115	-0.62838	32.4204	9	2	2	4	0	48	1	0	0	1	65.72	50.5587	3.5239	309.224
1087	CCC1(C(=O)NC(=O)NC1=O)C2=CCCCC2	TR	-2.1693	236.271	1.2492	60.9564	17	3	2	5	2	92	0	1	2	2	75.27	99.6366	2.40867	391.974
1088	C=CCC1(CC=C)C(=O)NC(=O)NC1=O	TS	-2.0608	208.217	0.491	53.7424	15	3	2	5	4	80	0	1	1	1	75.27	87.223	3.07121	314.577
1089	CCC1(CCC(C)C)C(=O)NC(=O)NC1=O	TR	-2.5743	226.276	1.185	58.4774	16	3	2	5	4	90	0	1	1	1	75.27	94.9671	2.8717	303.191
1090	CCNC1nC(NC(C)(C)C)nC(SC)n1	TR	-3.9847	241.364	2.2357	69.1474	16	6	2	6	4	90	1	0	0	1	62.73	100.868	2.945	347.553
1091	CC(C)NC1nC(N)nC(Cl)n1	TR	-2.7063	187.634	0.9275	48.0081	12	5	2	6	2	66	1	0	0	1	76.72	75.3782	2.85471	254.391
1092	CSC1nC(NC(C)C)nC(NC(C)C)n1	TR	-3.8642	241.364	2.2341	69.1254	16	6	2	6	5	90	1	0	0	1	62.73	100.868	2.91101	311.731
1093	NC(CC1CCCCC1)C(O)=O	TS	-1.0657	165.192	0.641	45.7572	12	2	2	3	3	64	1	0	0	1	63.32	70.8219	2.5846	258.491
1094	OC(=O)C1CCCnC1	TS	-0.835	123.111	0.7798	31.1963	9	2	1	3	1	46	1	0	0	1	50.19	51.9717	2.98145	207.558
1095	CCCCCCCC[S](=O)(=O)N[S](=O)(=O)CCCCCCCC	TR	-3.9145	369.593	3.9566	97.4613	23	4	1	7	16	140	0	0	0	0	80.31	143.285	3.91924	428.309
1096	NC(=O)CCl	TS	-0.0166	93.513	-0.2895	19.9144	5	1	1	3	1	30	0	0	0	0	43.09	34.9089	2.84738	44.9126
1097	CN(C(C)=O)C1CCCCC1	V	-0.951	149.193	1.6693	45.526	11	1	0	2	1	58	1	0	0	1	20.31	66.4476	2.85118	242.999
1098	CC(C)N(C(=O)CCl)C1CCCCC1	V	-2.4806	211.692	2.6668	59.784	14	1	0	3	3	76	1	0	0	1	20.31	89.4807	2.94906	297.416
1099	NCC(O)=O	TR	0.92	75.067	-0.9703	16.6902	5	2	2	3	1	30	0	0	0	0	63.32	29.3998	2.84738	42.9126
1100	CC1=CCC(CC1)C(C)(C)O	TR	-1.91	154.253	2.5037	47.3958	11	1	1	1	1	64	0	0	1	1	20.23	69.1225	2.53858	162.202
1101	OCC1OC(O)C(O)C(O)C1O	TR	0.74	180.156	-3.2214	35.986	12	6	5	6	1	72	0	1	1	1	110.38	68.6428	2.63441	146.219
1102	CCNC(=S)NCC	TR	-1.46	132.232	0.4903	39.9514	8	1	2	3	2	48	0	0	0	0	24.06	55.6575	3.05517	64.8289
1103	C\C=C\C=C\C(O)=O	TR	-1.77	112.128	1.2033	31.5898	8	1	1	2	2	44	0	0	0	0	37.3	48.1405	3.50011	122.49
1104	NC(CO)C(O)=O	V	-0.02	105.093	-1.6094	22.697	7	3	3	4	2	42	0	0	0	0	83.55	40.559	3.34342	72.5803
1105	ClC(Cl)(Cl)C(Cl)(Cl)Cl	TR	-3.94	236.74	3.7268	40.58	8	0	0	6	0	50	0	0	0	0	0	76.9238	4.02039	61.5098
1106	OC(=O)CCC(O)=O	V	-0.17	118.088	-0.0642	24.5056	8	2	2	4	3	46	0	0	0	0	74.6	45.7456	3.18185	92.6059
1107	OC(=O)CCCCC(O)=O	TR	-0.82	146.142	0.716	33.7396	10	2	2	4	5	58	0	0	0	0	74.6	58.4755	3.05509	113.71
1108	OC(CC(O)=O)C(O)=O	TS	0.64	134.087	-1.0934	25.8954	9	3	3	5	3	52	0	0	0	0	94.83	50.5398	3.63243	128.92
1109	OC1=CC=CC=C1	TS	-0.04	94.113	1.3922	28.1068	7	1	1	1	0	36	1	0	0	1	20.23	42.2256	3.02147	134.107
1110	NC(CCC(N)=O)C(O)=O	TR	-0.54	146.146	-1.3362	34.0396	10	3	3	5	4	58	0	0	0	0	106.41	57.9961	3.49073	145.828
1111	NC(CCCNC(N)=N)C(O)=O	TR	0	174.204	-1.33843	44.762	12	3	5	6	5	70	0	0	0	0	125.22	70.4347	3.31184	170.931
1112	NC1=CC(=CC=C1)N	V	0.51	108.144	0.851	35.2668	8	2	2	2	0	42	1	0	0	1	52.04	48.1112	3.07766	166.388
1113	CCC1=CC=C(O)C=C1	TR	-1.4	122.167	1.9546	37.4848	9	1	1	1	1	48	1	0	0	1	20.23	54.9555	2.88156	176.264
1114	CC1=CC(=C(C)C=C1C)C	TS	-3.84	134.222	2.92028	45.39	10	0	0	0	0	54	1	0	0	1	0	62.8912	3.28246	196.21
1115	ClC1=CC=C(Cl)C=C1	TS	-3.35	147.004	2.9934	36.462	8	0	0	2	0	42	1	0	0	1	0	58.0379	3.03246	145.388
1116	CCC1(CC)C(=O)NC(=O)NC1=O	TR	-1.42	184.195	0.1588	44.6964	13	3	2	5	2	72	0	1	1	1	75.27	75.8723	3.00736	246.563
1117	OC1=CC=CC(=C1)C=O	V	-1.23	122.123	1.2047	33.4943	9	2	1	2	1	46	1	0	0	1	37.3	52.7521	3.07076	217.911
1118	OC1=CC(=CC(=C1)O)O	TS	-1.05	126.111	0.8034	31.4364	9	3	3	3	0	48	1	0	0	1	60.69	51.8141	3.16567	169.065
1119	CCC1(CC=C)C(=O)NC(=O)NC1=O	TR	-1.61	196.206	0.3249	49.2194	14	3	2	5	3	76	0	1	1	1	75.27	81.5476	3.02971	289.179
1120	CCC1(CC)C(=O)NC(=O)N(C)C1=O	V	-2.1	198.222	0.501	49.3237	14	3	1	5	2	78	0	1	1	1	66.48	82.4472	3.11523	294.432
1121	CC1=CC=C(C=C1)C(O)=O	V	-2.53	136.15	1.69322	38.1383	10	1	1	2	1	52	1	0	0	1	37.3	59.117	3.0034	235.939
1122	COC1=NN(CS[P](=S)(OC)OC)C(=O)S1	TR	-3.1	302.339	1.5214	68.82	16	9	0	10	6	92	1	0	0	1	62.58	105.816	2.70751	437.227
1123	NNC(=O)C1=CC=NC=C1	TS	-0.04	137.142	-0.3149	35.8906	10	3	2	4	1	52	1	0	0	1	68.01	58.0374	2.85263	221.694
1124	OC(=O)C1=C(F)C=CC=C1	V	-1.39	140.113	1.5239	33.3593	10	1	1	3	1	52	1	0	0	1	37.3	56.9176	3.15294	257.538
1125	NC1=C(C=CC=C1)C(O)=O	TR	-1.52	137.138	0.967	37.8137	10	2	2	3	1	52	1	0	0	1	63.32	58.092	3.15294	257.538
1126	OC(=O)C1=CC(=CC=C1)O	TS	-1.24	138.122	1.0904	35.0661	10	2	2	3	1	52	1	0	0	1	57.53	57.5463	3.0699	254.783
1127	CCCCCC1(CC)C(=O)NC(=O)NC1=O	TR	-2.51	226.276	1.3291	58.5474	16	3	2	5	5	90	0	1	1	1	75.27	94.9671	2.78848	292.352
1128	CCNC(=O)NC(=O)C(=N/OC)/C#N	TR	-2.3	198.182	-0.64192	47.2724	14	5	2	7	3	76	0	0	0	0	103.58	80.7072	4.27226	291.8
1129	OC1=CC=C(C=C1)[N+]([O-])=O	V	-0.94	139.11	1.3004	34.7612	10	3	1	4	1	52	1	0	0	1	63.37	56.8786	3.0034	241.675
1130	CC1=C(C)C(=C(C)C(=C1C)C)C	TR	-5.23	162.276	3.53712	54.864	12	0	0	0	0	66	1	0	0	1	0	75.6211	3.60357	214.303
1131	OC1=CC(=CC=C1)[N+]([O-])=O	V	-1.07	139.11	1.3004	34.7612	10	3	1	4	1	52	1	0	0	1	63.37	56.8786	3.0699	258.925
1132	[NH]1C=CC2=C1C=CC=C2	TS	-1.21	117.151	2.1679	38.2987	9	0	1	1	0	44	2	0	0	2	15.79	53.3222	2.95466	278.545
1133	COC1=CC=CC=C1C(O)=O	V	-1.6	152.149	1.3934	39.9533	11	2	1	3	2	58	1	0	0	1	46.53	64.2306	3.12122	267.795
1134	CO[P](=O)(NC(C)=O)SC	TR	0.54	183.169	1.24	41.9472	10	4	1	6	3	60	0	0	0	0	55.4	63.9632	4.07412	163.886
1135	[O-][N+](=O)C1=CC=CC(=C1)C=O	TS	-1.98	151.121	1.4073	38.4839	11	3	0	4	2	56	1	0	0	1	60.21	62.6108	3.0996	295.492
1136	CCCC(C)C1(CC)C(=O)NC(=S)NC1=O	TR	-3.6	242.344	1.3499	65.6794	16	3	2	5	4	90	0	1	1	1	58.2	101.164	3.04603	307.946
1137	CCOC(=O)C1=CC=C(O)C=C1	V	-2.2	166.176	1.5689	44.0633	12	3	1	3	2	64	1	0	0	1	46.53	70.5955	2.75374	263.607
1138	COC(=O)C1=CC=C(OC)C=C1	TR	-2.34	166.176	1.4818	44.3335	12	3	0	3	2	64	1	0	0	1	35.53	70.9148	2.84352	263.607
1139	OC(=O)C1=CC(=CC=C1O)O	V	-0.85	154.121	0.796	36.7309	11	3	3	4	1	58	1	0	0	1	77.76	62.3406	3.23221	292.492
1140	CC(=O)NC1=CC=C(C=O)C=C1	TS	-1.63	163.176	1.4575	46.1332	12	2	1	3	2	62	1	0	0	1	46.17	70.3991	2.77302	289.902
1141	CCCOC(=O)C1=CC=C(O)C=C1	TR	-2.68	180.203	1.959	48.6803	13	3	1	3	3	70	1	0	0	1	46.53	76.9605	2.61117	276.726
1142	CC12CCC3C(CCC4=CC(=O)CCC34)C1CCC2(O)C#C	TR	-4.63	298.426	3.4925	85.8758	22	2	1	2	0	118	0	3	4	4	37.3	132.915	1.65202	583.005
1143	OC(=O)C1=C(Br)C=CC=C1	V	-2.05	201.019	2.1473	41.1013	10	1	1	3	1	52	1	0	0	1	37.3	66.6196	3.15294	257.538
1144	CN(C)C=NC1=C(C)C=C(Cl)C=C1	V	-2.88	196.681	2.86982	58.028	13	1	0	3	2	70	1	0	0	1	15.6	83.8496	2.89721	318.701
1145	CC12CCC3C(CCC4=CC(=O)CCC34C)C1CCC2=O	TR	-3.7	286.415	4.0874	81.717	21	2	0	2	0	114	0	3	4	4	34.14	126.918	1.70381	545.77
1146	C1=NC2=C(N=C1)N=CN=C2	TR	0.02	132.126	0.4198	35.128	10	4	0	4	0	48	2	0	0	2	51.56	56.9917	2.88805	280.725
1147	OC(=O)CNC(=O)C1=CC=CC=C1	TR	-1.69	179.175	0.501	46.411	13	2	2	4	3	68	1	0	0	1	66.4	75.1934	2.54457	307.896
1148	CN(C)C(=O)NC1=CC=C(Cl)C=C1	TR	-2.89	198.653	2.4335	54.1577	13	1	1	4	1	70	1	0	0	1	32.34	82.3007	2.64609	294.988
1149	OC(=O)C1=C(C=CC=C1)[N+]([O-])=O	TR	-1.35	167.12	1.293	40.0557	12	3	1	5	2	62	1	0	0	1	80.44	67.4051	3.26708	300.933
1150	CCNC1=NC(=NC(=N1)Cl)NCC	TR	-4.55	201.661	1.3886	53.1644	13	5	2	6	4	72	1	0	0	1	62.73	81.9531	2.82887	253.335
1151	C1=CC=C(C=C1)C2=CC=CC=C2	TR	-4.32	154.212	3.3536	51.878	12	0	0	0	1	58	2	0	0	2	0	72.4885	2.45715	297.431
1152	CC(CCC(O)=O)C1CCC2C3C(O)CC4CC(O)CCC4(C)C3CCC12C	TR	-4.57	392.58	4.4779	108.647	28	3	3	4	4	160	0	4	4	4	77.76	169.654	1.55482	605.413
1153	CC(C)NC1=NC(=NC(=N1)Cl)NC(C)C	TR	-4.46	229.715	2.1656	62.3544	15	5	2	6	4	84	1	0	0	1	62.73	94.683	2.84364	298.029
1154	ClC(Cl)(Cl)C(NC=O)N1CCN(CC1)C(NC=O)C(Cl)(Cl)Cl	TR	-4.16	434.966	1.4886	89.7014	22	4	2	12	6	128	0	1	1	1	64.68	157.78	2.71546	344.593
1155	CON(C)C(=O)NC1=CC=C(Cl)C=C1	V	-2.47	214.652	2.3651	55.2427	14	2	1	5	2	76	1	0	0	1	41.57	87.3683	2.60487	313.093
1156	OC(=O)C1=CC=C(Cl)C(=C1)[N+]([O-])=O	TR	-2.76	201.565	1.9464	45.0657	13	3	1	6	2	68	1	0	0	1	80.44	77.7083	3.26705	376.755
1157	OC(=O)CCCOC1=C(Cl)C=C(Cl)C=C1	V	-3.57	249.093	3.237	58.8268	15	2	1	5	5	82	1	0	0	1	46.53	97.567	2.40469	352.521
1158	CC(CCC(O)=O)C1CCC2C3C(O)CC4CC(O)CCC4(C)C3CC(O)C12C	TR	-3.63	408.579	3.4487	110.037	29	4	4	5	4	166	0	4	4	4	97.99	174.448	1.60633	636.761
1159	CC1=CC=C(C)C2=C1C=CC=C2C	TR	-4.92	170.255	3.76506	58.159	13	0	0	0	0	66	2	0	0	2	0	79.2079	2.99805	444.54
1160	OC1=CC=CC2=C1C=CC=C2O	TR	-2.92	160.172	2.251	47.2776	12	2	2	2	0	60	2	0	0	2	40.46	69.7015	2.94337	379.858
1161	COC1=C(C(O)=O)C(=CC=C1Cl)Cl	TR	-1.7	221.039	2.7002	49.9733	13	2	1	5	2	70	1	0	0	1	46.53	84.8371	3.43321	349.488
1162	ClCC#CCOC(=O)NC1=CC(=CC=C1)Cl	TR	-4.24	258.104	3.1307	64.9187	16	2	1	5	2	84	1	0	0	1	38.33	103.687	2.39631	423.483
1163	ClC1=CC2=C(C=CC=C2)C=C1Cl	TS	-5.36	197.064	4.1466	53.968	12	0	0	2	0	60	2	0	0	2	0	80.7196	2.83952	380.608
1164	ClC1=CC=CC2=C1C=CC=C2Cl	V	-5.7	197.064	4.1466	53.968	12	0	0	2	0	60	2	0	0	2	0	80.7196	2.94337	379.858
1165	OC(=O)COC1=C(Cl)C=C(Cl)C(=C1)Cl	TR	-2.98	255.484	3.1102	54.6028	14	2	1	6	3	76	1	0	0	1	46.53	95.1404	2.86663	365.094
1166	CC12CCC3C(CCC4=CC(=CC=C34)O)C1CCC2O	TS	-4.83	272.388	3.6092	78.7306	20	2	2	2	0	108	1	2	3	4	40.46	120.382	1.7112	538.22
1167	CC1=C(SCCO1)C(=O)NC2=CC=CC=C2	TR	-3.14	235.308	2.62	66.1817	16	3	1	4	2	84	1	0	1	2	38.33	98.8737	2.08665	414.287
1168	CN1C2CCC1CC(C2)OC(=O)C(CO)C3=CC=CC=C3	V	-1.91	289.375	1.9309	79.9558	21	4	1	4	4	114	1	2	2	3	49.77	125.263	1.63268	476.068
1169	CC(=O)N[S](=O)(=O)C1=CC=C(N)C=C1	V	-1.41	214.246	0.0936	51.8569	14	4	2	6	2	76	1	0	0	1	89.26	81.9733	3.04749	436.159
1170	C[N]1C=NC2=C1C(=O)N(C)C(=O)N2C	TR	-0.91	194.194	-1.0293	51.196	14	6	0	6	0	74	2	0	0	2	61.82	79.029	3.22128	616.529
1171	CC12CCC3C(CCC4=CC(=CC=C34)O)C1CCC2(O)C#C	TR	-4.47	296.41	3.6126	86.5066	22	2	2	2	0	116	1	2	3	4	40.46	132.111	1.7217	658.161
1172	O1C2=C(C=CC=C2)C3=C1C=CC=C3	TR	-4.6	168.195	3.586	53.72	13	1	0	1	0	62	3	0	0	3	13.14	75.5891	2.64244	512.884
1173	CN1C2CC(CC1C3OC23)OC(=O)C(CO)C4=CC=CC=C4	TR	-1.24	303.358	0.9181	79.3828	22	5	1	5	4	118	1	3	3	4	62.3	129.371	1.42	545.037
1174	CCN(CC)CCNC(=O)C1=CC(=C(N)C=C1OC)Cl	TR	-3.18	299.802	2.0024	82.5376	20	4	2	6	7	112	1	0	0	1	67.59	124.579	2.69937	461.977
1175	COC(=O)N[S](=O)(=O)C1=CC=C(N)C=C1	TR	-1.76	230.245	0.3135	53.5809	15	5	2	7	2	82	1	0	0	1	98.49	87.0869	2.96358	452.035
1176	CC(=O)OCC(=O)C1CCC2C3CCC4=CC(=O)CCC4(C)C3CCC12C	TR	-4.97	372.505	4.2667	101.84	27	4	0	4	3	148	0	3	4	4	60.44	161.653	1.55507	707.167
1177	NC1=NC2=C(N=C[N]2COCCO)C(=O)N1	TS	-2.12	225.208	-1.3318	55.5989	16	7	3	8	4	86	2	0	0	2	119.05	89.6952	2.36079	546.088
1178	O=C(NC1=CN=NS1)NC2=CC=CC=C2	TR	-3.85	220.257	2.1821	58.9924	15	4	2	6	2	76	2	0	0	2	66.91	90.3039	1.93519	428.638
1179	CCCCNC(=O)N[S](=O)(=O)C1=CC=C(C)C=C1	TR	-3.17	270.354	1.78302	69.8072	18	3	2	6	5	100	1	0	0	1	75.27	107.643	2.64449	494.559
1180	CC1=NC(=NC(=C1)C2CC2)NC3=CC=CC=C3	V	-4.05	225.295	3.40602	68.4687	17	3	1	3	3	86	2	1	1	3	37.81	100.932	1.87004	518.245
1181	CC(=O)OCC(=O)C1(O)CCC2C3CCC4=CC(=O)CCC4(C)C3C(O)CC12C	TR	-4.61	404.503	2.3524	104.69	29	6	2	6	3	160	0	3	4	4	100.9	171.242	1.65462	786.238
1182	COC1=CC=C2C=C(C=CC2=C1)C(C)C(O)=O	V	-3.29	230.263	3.0365	66.5508	17	2	1	3	3	88	2	0	0	2	46.53	99.6421	2.47896	560.396
1183	ClC1=CC=C(C=C1)C2=C(Cl)C=C(Cl)C=C2	TS	-6	257.547	5.3138	66.908	15	0	0	3	1	76	2	0	0	2	0	103.398	2.49425	474.726
1184	ClC1=CC(=C(C(=C1)Cl)C2=CC=CC=C2)Cl	TR	-6.06	257.547	5.3138	66.908	15	0	0	3	1	76	2	0	0	2	0	103.398	2.63522	454.476
1185	CN1N=C(SC1=NC(C)=O)[S](N)(=O)=O	TR	-1.92	236.278	-1.4238	48.7022	14	6	1	9	1	78	1	0	0	1	107.41	83.9418	3.39848	523.417
1186	ClC1=CC=C(Cl)C(=C1Cl)C2=CC=CC=C2	V	-6.29	257.547	5.3138	66.908	15	0	0	3	1	76	2	0	0	2	0	103.398	2.67546	477.726
1187	[O-][N+](=O)C1=CC=C(O1)\C=N\N2CC(=O)NC2=O	V	-3.38	238.159	0.0735	53.2011	17	6	1	9	3	88	1	1	1	2	118.05	93.8308	2.07029	519.74
1188	CO[P](=S)(OC)OC1=CC=C(C=C1)[N+]([O-])=O	TR	-3.68	263.211	2.4909	62.0274	16	6	0	8	5	88	1	0	0	1	70.83	97.5348	2.83268	412.942
1189	CCOC1OC2=CC=C(O[S](C)(=O)=O)C=C2C1(C)C	TR	-3.42	286.349	2.0576	70.9818	19	5	0	6	4	106	1	0	1	2	61.83	113.155	2.35135	576.696
1190	NC1=NC=NC2=C1N=C[N]2C3OC(CO)C(O)C3O	TR	-1.73	267.245	-1.98	62.7448	19	9	4	9	2	102	2	1	1	3	139.54	106.846	2.03544	602.618
1191	CC(C(O)=O)C1=CC=C(C(=C1)F)C2=CC=CC=C2	TR	-4.29	244.265	3.6808	67.8868	18	1	1	3	3	92	2	0	0	2	37.3	104.705	2.40136	563.961
1192	CC1(C)OC2CC3C4CCC5=CC(=O)C=CC5(C)C4(F)C(O)CC3(C)C2(O1)C(=O)CO	TR	-4.31	434.504	2.4188	108.599	31	6	2	7	2	170	0	4	5	5	93.06	181.029	1.6369	925.03
1193	ClC1=CC(=C(C=C1)C2=CC=C(Cl)C=C2Cl)Cl	TR	-6.51	291.992	5.9672	71.918	16	0	0	4	1	82	2	0	0	2	0	113.702	2.58564	485.037
1194	ClC1=CC(=C(C=C1)C2=CC(=CC=C2Cl)Cl)Cl	TR	-7.26	291.992	5.9672	71.918	16	0	0	4	1	82	2	0	0	2	0	113.702	2.62319	534.537
1195	ClC1=CC(=C(Cl)C=C1)C2=CC(=CC=C2Cl)Cl	TS	-7.04	291.992	5.9672	71.918	16	0	0	4	1	82	2	0	0	2	0	113.702	2.66168	485.037
1196	ClC1=CC(=C(Cl)C(=C1Cl)Cl)C2=CC=CC=C2	V	-7.16	291.992	5.9672	71.918	16	0	0	4	1	82	2	0	0	2	0	113.702	2.67707	520.287
1197	ClC(Cl)C(C1=CC=C(Cl)C=C1)C2=CC=C(Cl)C=C2	TR	-7.2	320.046	5.929	80.241	18	0	0	4	3	94	2	0	0	2	0	126.431	2.39411	456.822
1198	CN1CCN=C(C2=CC=CC=C2)C3=C1C=CC(=C3)Cl	TR	-4.43	270.763	3.6272	81.67	19	2	0	3	1	96	2	0	1	3	15.6	117.901	2.18441	619.901
1199	NC(=O)N1C2=C(C=CC=C2)C=CC3=C1C=CC=C3	TS	-3.29	236.274	3.3872	73.5344	18	1	1	3	0	88	2	0	1	3	46.33	105.149	2.30525	596.947
1200	CCCN(CCC)C1=C(C=C(C=C1[N+]([O-])=O)C(F)(F)F)[N+]([O-])=O	TR	-6.05	335.282	4.1482	77.5478	23	5	0	10	7	128	1	0	0	1	89.52	129.548	3.69938	563.613
1201	CCC(=O)N(C1CCN(CC1)CCC2=CC=CC=C2)C3=CC=CC=C3	TR	-3.82	336.479	4.1367	103.827	25	2	0	3	6	132	2	1	1	3	23.55	150.813	1.56763	648.242
1202	C1=CC2=C(C=C1)C3=C4C(=CC=C3)C=CC=C24	TR	-5.93	202.256	4.4872	68.378	16	0	0	0	0	74	3	0	1	4	0	94.1643	2.313	650.31
1203	CCCCNC(=O)[N]1C(=NC2=C1C=CC=C2)NC(=O)OC	TR	-4.86	290.323	2.5724	79.4654	21	5	2	7	4	112	2	0	0	2	85.25	121.843	2.35022	650.707
1204	ClC1=CC(=C(Cl)C=C1)C2=C(Cl)C(=C(Cl)C=C2)Cl	TS	-7.91	326.437	6.6206	76.928	17	0	0	5	1	88	2	0	0	2	0	124.005	2.68704	577.349
1205	CCOC1=CC2=C(C=C1)N=C(S2)[S](N)(=O)=O	TR	-4.03	258.324	1.3424	62.1622	16	5	1	7	3	86	2	0	0	2	82.28	96.9172	2.54173	618.716
1206	CCCN(CCC)C1=C(C(=C(C=C1[N+]([O-])=O)C(F)(F)F)N)[N+]([O-])=O	TR	-7.07	350.297	3.7304	81.9602	24	6	1	11	7	134	1	0	0	1	115.54	134.888	3.86911	643.084
1207	CC1=C(C(=O)NC2=CC=CC=C2)[S](=O)(=O)CCO1	TR	-2.43	267.306	1.3016	67.5105	18	4	1	6	2	96	1	0	1	2	72.47	105.376	2.28543	589.763
1208	CC1=CC(=NC(=N1)C)N[S](=O)(=O)C2=CC=C(N)C=C2	TS	-2.3	278.337	1.47644	73.1689	19	5	2	7	3	100	2	0	0	2	97.97	111.308	2.33051	675.919
1209	ClC1=C(Cl)C(=C(C=C1)C2=CC=C(Cl)C(=C2Cl)Cl)Cl	TR	-8.78	360.882	7.274	81.938	18	0	0	6	1	94	2	0	0	2	0	134.308	2.70655	564.95
1210	ClC1=CC(=C(C(=C1)Cl)C2=C(Cl)C=C(Cl)C=C2Cl)Cl	TR	-8.71	360.882	7.274	81.938	18	0	0	6	1	94	2	0	0	2	0	134.308	2.77616	518.45
1211	CC(=O)OCN1C(=O)NC(C1=O)(C2=CC=CC=C2)C3=CC=CC=C3	V	-4.47	324.336	2.0026	85.6747	24	4	1	6	4	122	2	1	1	3	75.71	138.58	2.08919	734.62
1212	CO[P](=S)(OC)SCN1N=NC2=CC=CC=C2C1=O	TR	-4.04	317.332	1.9995	79.692	19	8	0	9	5	102	2	0	0	2	66.24	118.567	2.29629	683.019
1213	COC(=O)NC1=NC2=CC(=CC=C2[NH]1)C(=O)C3=CC=CC=C3	TS	-3.88	295.298	2.9722	81.9959	22	4	2	6	3	110	3	0	0	3	84.08	125.68	1.92609	840.223
1214	ClC1=CC(=C(C=C1Cl)C2=C(Cl)C=C(Cl)C(=C2Cl)Cl)Cl	TS	-7.92	395.327	7.9274	86.948	19	0	0	7	1	100	2	0	0	2	0	144.611	2.79616	663.858
1215	CCC(=O)OCN1C(=O)NC(C1=O)(C2=CC=CC=C2)C3=CC=CC=C3	TR	-4.91	338.363	2.3927	90.2917	25	4	1	6	5	128	2	1	1	3	75.71	144.945	2.03421	750.086
1216	ClC1=CC=C(Cl)C(=C1)C2=C(Cl)C(=C(Cl)C(=C2Cl)Cl)Cl	TS	-8.46	395.327	7.9274	86.948	19	0	0	7	1	100	2	0	0	2	0	144.611	2.86561	634.608
1217	CC1=C2C=CC3=C(C=CC=C3)C2=C(C)C4=C1C=CC=C4	V	-6.78	256.348	5.76304	88.434	20	0	0	0	0	96	4	0	0	4	0	118.206	2.38258	961.559
1218	N[S](=O)(=O)C1=CC2=C(C=C1Cl)N=CN[S]2(=O)=O	TR	-2.92	295.729	-0.0609	61.2987	17	5	2	10	1	92	1	0	1	2	118.69	102.4	2.8466	723.731
1219	CN(C)CC\C=C/1C2=C(SC3=C1C=C(Cl)C=C3)C=CC=C2	TS	-5.87	315.869	5.188	92.267	21	2	0	3	3	108	2	0	1	3	3.24	135.169	2.06289	691.368
1220	ClC1=CC(=C(Cl)C(=C1Cl)Cl)C2=CC(=C(Cl)C(=C2Cl)Cl)Cl	TR	-9.16	429.772	8.5808	91.958	20	0	0	8	1	106	2	0	0	2	0	154.915	2.82635	646.079
1221	COC1=CC2=C(SC3=C(C=CC=C3)N2CC(C)CN(C)C)C=C1	TS	-4.37	328.481	4.4956	98.283	23	4	0	4	5	122	2	0	1	3	15.71	142.794	1.98709	686.82
1222	ClC1=C(Cl)C(=C(Cl)C(=C1)Cl)C2=C(Cl)C(=CC(=C2Cl)Cl)Cl	TR	-9.38	429.772	8.5808	91.958	20	0	0	8	1	106	2	0	0	2	0	154.915	2.96031	593.579
1223	CC1=C(NC(=O)C2=CC(=C(Cl)C=C2O)[S](N)(=O)=O)C(=CC=C1)C	TR	-3.9	354.815	2.56214	88.3592	23	4	3	8	3	122	2	0	0	2	109.49	138.493	2.48129	874.34
1224	CC1=NN=C2CN=C(C3=CC=CC=C3)C4=C(C=CC(=C4)Cl)[N]12	V	-3.6	308.772	3.58012	86.891	22	4	0	5	1	108	3	0	1	4	43.07	132.66	2.01338	880.93
1225	C1=CC2=C3C(=C1)C=CC=C3C4=CC=CC5=CC=CC2=C45	TR	-8.7	252.316	5.7372	87.652	20	0	0	0	0	92	5	0	0	5	0	116.137	2.31761	917.005
1226	C1=CC2=C3C=CC=C4C=CC5=CC=CC(=C2C=C1)C5=C34	TR	-7.66	252.316	5.7372	87.652	20	0	0	0	0	92	5	0	0	5	0	116.137	2.32915	998.005
1227	ClC1=C(Cl)C(=C(Cl)C(=C1)C2=C(Cl)C(=C(Cl)C(=C2Cl)Cl)Cl)Cl	TS	-9.62	464.217	9.2342	96.968	21	0	0	9	1	112	2	0	0	2	0	165.218	2.92834	722.364
1228	O=[P](OC1=CC=CC=C1)(OC2=CC=CC=C2)OC3=CC=CC=C3	TR	-5.66	326.288	5.3315	88.8165	23	4	0	5	6	116	3	0	0	3	44.76	134.436	1.86868	667.718
1229	COC1=CC2=C(C=C1OC)C3C(CO2)OC4=C(C=CC5=C4CC(O5)C(C)=C)C3=O	TR	-4.47	394.423	3.7033	105.904	29	6	0	6	3	150	2	0	3	5	63.22	168.525	1.58162	1040.15
1230	N[S](=O)(=O)C1=C(Cl)C=C2NC(N[S](=O)(=O)C2=C1)C(Cl)Cl	TR	-3.18	380.662	0.821	76.0514	20	5	3	12	2	112	1	0	1	2	118.36	130.026	2.67433	763.417
1231	CN1C(=C(O)C2=C(C=CC=C2)[S]1(=O)=O)C(=O)NC3=CC=CC=N3	TR	-4.5	331.353	1.581	83.8063	23	5	2	8	2	118	2	0	1	3	99.6	132.499	2.09328	907.329
1232	FC1=C(NC(=O)NC(=O)C2=C(F)C=CC=C2F)C=CC(=C1)OC3=CC=C(C=C3Cl)C(F)(F)F	V	-8.09	488.771	6.5303	105.771	33	3	2	12	4	172	3	0	0	3	67.43	186.473	1.6834	1212.86
1233	C1=CC2=C3C4=C1C=CC5=C4C6=C(C=C5)C=CC7=C6C3=C(C=C2)C=C7	TR	-8.83	300.36	6.9192	105.036	24	0	0	0	0	108	7	0	0	7	0	137.458	2.11326	1140.95
1234	COC1=CC(=CC(=C1O)OC)C2C3C(COC3=O)C(OC4OC5COC(C)OC5C(O)C4O)C6=C2C=C7OCOC7=C6	TR	-3.47	588.562	1.3386	138.345	42	13	3	13	5	226	2	3	5	7	160.83	240.229	1.31824	1352.53
1235	N#CCC#N	TR	0.25	66.063	0.42366	15.843	5	2	0	2	0	24	0	0	0	0	47.58	30.2543	2.85727	70.0466
1236	O=C1C=CC(=O)C=C1	TR	-0.89	108.096	0.2506	28.294	8	2	0	2	0	40	0	0	1	1	34.14	46.502	2.82648	148.705
1237	CCC(Br)(CC)C(=O)NC(N)=O	TR	-2.68	237.097	1.135	49.9661	12	2	2	5	3	70	0	0	0	0	72.19	80.0092	4.31837	189.845
1238	OC1=CC(=CC=C1)Cl	V	-0.71	128.558	2.0456	33.1168	8	1	1	2	0	42	1	0	0	1	20.23	52.5289	3.07766	168.388
1239	CC1=C(Cl)C(=CC(=C1)O)C	TS	-2.67	156.612	2.66244	42.5908	10	1	1	2	0	54	1	0	0	1	20.23	65.2588	3.31053	232.43
1240	CNC(=O)OC1=CC(=C(C)C=C1)C	TR	-2.49	179.219	2.02164	50.9997	13	2	1	3	1	70	1	0	0	1	38.33	77.7161	2.79357	320.701
1241	CCC(C)C1=C(OC(=O)NC)C=CC=C1	V	-2.53	207.273	2.9183	60.2317	15	2	1	3	3	82	1	0	0	1	38.33	90.446	2.90575	336.149
1242	CNC(=O)N1C=C(F)C(=O)NC1=O	TR	-2.28	187.13	-1.1368	41.1344	13	4	2	7	0	70	1	0	0	1	83.96	71.0105	3.40593	447.173
1243	CCNC1=NC(=NC(=N1)NCC)SC	TS	-2.73	213.31	1.4571	59.9354	14	6	2	6	5	78	1	0	0	1	62.73	88.1379	2.88004	266.81
1244	CCC(C)([S](=O)(=O)CC)[S](=O)(=O)CC	TR	-1.91	242.362	0.982	57.6176	14	4	0	6	5	86	0	0	0	0	68.28	86.5446	5.67692	343.564
1245	NC1=[N+]([O-])C(=NC(=C1)N2CCCCC2)N	TR	-1.94	209.253	-0.1303	58.0858	15	5	2	6	1	82	1	1	1	2	95.11	88.0874	2.27403	338.515
1246	COC1=NC(=NC(=N1)NC(C)C)NC(C)C	TR	-2.56	225.296	1.5208	63.8964	16	6	2	6	5	90	1	0	0	1	71.96	95.8582	2.91101	311.731
1247	COCCN(C(=O)CCl)C1=C(C)C=CC=C1C	TR	-2.09	255.745	2.52164	70.865	17	2	0	4	5	94	1	0	0	1	29.54	107.324	3.07331	372.756
1248	FC(F)(F)C1=CC=CC(=C1)N2CC(CCl)C(Cl)C2=O	TR	-4.05	312.118	3.5144	67.648	19	1	0	7	2	104	1	1	1	2	20.31	117.64	2.30728	492.108
1249	CN1CCC23C4OC5=C(O)C=CC(=C25)CC1C3C=CC4O	TR	-3.15	285.343	1.1981	77.5766	21	4	2	4	0	110	1	1	4	5	52.93	123.195	1.84453	670.244
1250	COCC(=O)N(C(C)C(=O)OC)C1=C(C)C=CC=C1C	TR	-1.6	279.336	1.84434	76.756	20	4	0	5	5	110	1	0	0	1	55.84	119.026	3.29997	478.397
1251	CCCCCCC(C)OC(=O)COC1=NC(=C(Cl)C(=C1Cl)N)F	V	-6.43	367.248	4.3906	88.4354	23	5	1	8	9	130	1	0	0	1	74.44	144.801	2.44564	543.944
1252	CO[P](=S)(OC)OC1=C(Cl)C=C(C=C1)[N+]([O-])=O	TR	-4.68	297.656	3.1443	67.0374	17	6	0	9	5	94	1	0	0	1	70.83	107.838	3.01218	474.983
1253	CCOC(=O)NC1=CC(=CC=C1)OC(=O)NC2=CC=CC=C2	TS	-4.52	300.314	3.8659	83.1754	22	4	2	6	4	114	2	0	0	2	76.66	127.598	1.94747	643.604
1254	[O-][N+]1=NC(=NC2=C1C=C(Cl)C=C2)[N]3C=CN=C3	V	-3.63	247.645	1.1023	60.63	17	5	0	7	1	84	3	0	0	3	70.54	100.698	2.27915	682.479
1255	CC1=C(C)N=C(N[S](=O)(=O)C2=CC=C(N)C=C2)O1	TR	-2.22	267.31	1.67444	67.6399	18	5	2	7	3	96	2	0	0	2	98.22	104.883	2.29376	639.842
1256	CCO[P](=S)(OCC)OC1=CC=C(C=C1)[S](C)(=O)=O	TR	-3.58	324.36	2.7664	77.7168	19	6	0	8	7	108	1	0	0	1	61.83	118.602	2.89763	542.953
1257	CC(C)OC1=C(Cl)C=C(Cl)C(=C1)N2N=C(OC2=O)C(C)(C)C	TS	-5.54	345.226	4.217	86.584	22	5	0	7	3	120	2	0	0	2	57.26	138.337	2.57623	742.221
1258	ClC1=C(Cl)C(=C(OC2=CC(=C(Cl)C=C2Cl)Cl)C=C1)Cl	V	-8.31	376.881	7.3993	83.018	19	1	0	7	2	100	2	0	0	2	9.23	139.422	2.42049	640.602
1259	ClC1=C(Cl)C=C(OC2=C(Cl)C(=C(Cl)C(=C2Cl)Cl)Cl)C(=C1)Cl	TR	-10.1	445.771	8.7061	93.038	21	1	0	9	2	112	2	0	0	2	9.23	160.028	2.57611	698.923
1260	CCOC(=O)C(C)OC1=CC=C(OC2=NC3=C(C=C(Cl)C=C3)N=C2)C=C1	TR	-5.97	372.808	4.4059	97.787	26	6	0	7	6	134	3	0	0	3	70.54	155.24	1.67143	915.061
1261	CC1COC(C[N]2C=NC=N2)(O1)C3=C(Cl)C=C(OC4=CC=C(Cl)C=C4)C=C3	TS	-4.91	406.269	4.6655	101.177	27	6	0	8	5	140	3	1	1	4	58.4	166.139	1.61935	918.459
1262	C1CCCNCC1	V	-0.49	99.177	1.15	31.3377	7	1	1	1	0	42	0	1	1	1	12.03	45.108	2.04167	23.7932
1263	CCCC(=O)CCC	TS	-1.48	114.188	2.1557	34.823	8	1	0	1	4	48	0	0	0	0	17.07	51.0904	3.05517	58.7871
1264	I\C=C\I	TR	-3.22	279.846	2.3276	37.18	4	0	0	2	0	24	0	0	0	0	0	52.9383	2.54919	19.2193
1265	CCCC(N)C(O)=O	TS	-0.11	117.148	0.1984	30.5192	8	2	2	3	3	48	0	0	0	0	63.32	48.4947	3.31809	82.4979
1266	CCC(Br)(CC)C(N)=O	TS	-1.44	194.072	1.4254	41.4344	9	1	1	3	3	54	0	0	0	0	43.09	63.9329	4.09034	109.625
1267	CC(CC(O)=O)C(O)=O	V	0.48	132.115	0.1818	29.0526	9	2	2	4	3	52	0	0	0	0	74.6	52.1105	3.63243	128.92
1268	CC(CCC(O)=O)CC(O)=O	TR	0.09	160.169	0.962	38.2866	11	2	2	4	5	64	0	0	0	0	74.6	64.8404	3.44255	152.52
1269	CN(C)C(=O)NC1CCCCCCC1	TR	-2.26	198.31	2.3705	58.3257	14	1	1	3	1	82	0	1	1	1	32.34	86.8541	2.29554	172.126
1270	OC1CC(=CC(O)C1O)C(O)=O	TR	0.01	174.152	-1.5162	38.3562	12	4	4	5	1	68	0	0	1	1	97.99	68.5719	2.80945	221.837
1271	CCCCCCCCCCCCCCCCC(O)=O	V	-4.69	270.457	5.9424	82.5648	19	1	1	2	15	114	0	0	0	0	37.3	119.534	2.93124	189.701
1272	O=C1CCC(=O)N1	TS	0.39	99.089	-0.577	22.3837	7	2	1	3	0	38	0	1	1	1	46.17	40.7012	2.55371	104.858
1273	CC1=CNC(=O)N=C1N	TR	-1.44	125.131	-0.33948	34.0071	9	3	2	4	0	48	1	0	0	1	71.77	51.7371	3.33609	265.151
1274	OCC(O)C(O)C(O)C(=O)CO	TR	0.32	180.156	-3.3772	37.199	12	6	5	6	5	72	0	0	0	0	118.22	68.6967	4.07958	146.974
1275	N#CC1=C(C=CC=C1)C#N	V	-2.38	128.134	1.42996	35.872	10	2	0	2	0	46	1	0	0	1	47.58	58.9464	3.28498	281.765
1276	O=C1NC(=O)C2(CCCCCC2)C(=O)N1	TR	-2.98	210.233	0.693	51.8164	15	3	2	5	0	82	0	2	2	2	75.27	87.5964	2.26223	294.629
1277	CCC(=O)NC1=CC=CC=C1	V	-1.55	149.193	2.0351	45.3627	11	1	1	2	2	58	1	0	0	1	29.1	66.2376	2.5793	230.578
1278	CNC(=O)C(C)SCCS[P](=O)(OC)OC	TR	0.54	287.343	1.9882	70.0692	16	6	1	8	8	96	0	0	0	0	64.63	104.69	3.75699	256.423
1279	OC(=O)C1=CC=C(O)C=C1O	TR	-1.41	154.121	0.796	36.7309	11	3	3	4	1	58	1	0	0	1	77.76	62.3406	3.19607	292.492
1280	O[S](=O)(=O)C1=NC=C[NH]1	V	-0.3	148.143	-0.3436	28.4023	9	3	2	6	1	50	1	0	0	1	83.05	51.4888	3.20043	274.016
1281	CC1=NC2=C([NH]1)C=NC=N2	TR	-0.41	134.142	0.66132	36.4207	10	3	1	4	0	50	2	0	0	2	54.46	57.3461	2.87651	318.275
1282	OC(=O)C1=CC=CN=C1C(O)=O	TS	-1.48	167.12	0.478	38.1556	12	3	2	5	2	62	1	0	0	1	87.49	67.2924	3.26708	300.933
1283	CC(=O)OC1CCC2(C)C3CCC4(C)C(CCC4=O)C3CC=C2C1	TR	-4.53	330.468	4.45	92.264	24	3	0	3	1	132	0	3	4	4	43.37	144.762	1.59737	606.205
1284	CC1=NC2=C(C=NC=N2)N=C1	TR	-0.01	146.153	0.72822	39.865	11	4	0	4	0	54	2	0	0	2	51.56	63.3566	2.8289	384.852
1285	O=C1NC2=C(C=N1)N=CC=N2	V	-2	148.125	-0.2869	37.9537	11	4	1	5	0	54	2	0	0	2	71.53	61.1532	2.93535	435.53
1286	NC1=NC(=O)NC2=C1N=C[NH]2	TR	-3.38	151.129	-0.7716	38.9218	11	4	3	6	0	56	2	0	0	2	100.45	60.4826	3.01966	441.315
1287	ClC1=NC2=C(C=N1)N=CC=N2	V	-0.71	166.571	1.0732	40.138	11	4	0	5	0	54	2	0	0	2	51.56	67.2949	2.8289	388.994
1288	CC1=C(C=C(N)C=C1)[S](O)(=O)=O	TR	-1.62	187.22	0.82392	45.406	12	3	2	5	1	66	1	0	0	1	80.39	70.7649	3.43449	397.113
1289	COC1=NC2=C(N=CN=C2)N=C1	TR	-1.14	162.152	0.4284	41.68	12	5	0	5	1	60	2	0	0	2	60.79	68.4701	2.674	403.283
1290	S=C1NC2=C(C=N1)N=CC=N2	V	-2.68	164.193	1.08239	42.5177	11	4	1	5	0	54	2	0	0	2	54.46	67.3504	2.93535	435.53
1291	CN1C(=O)C=NC2=C1N=CN=C2	TR	-0.92	162.152	-0.2765	42.574	12	5	0	5	0	60	2	0	0	2	60.67	67.7281	3.00524	476.035
1292	CN1C=NC2=C(N=CC=N2)C1=O	V	-1.07	162.152	-0.2765	42.574	12	5	0	5	0	60	2	0	0	2	60.67	67.7281	3.01023	476.035
1293	OCC1OC(OCC2OC(OC3(CO)OC(CO)C(O)C3O)C(O)C(O)C2O)C(O)C(O)C1O	TR	0.3	504.438	-7.5714	101.275	34	16	11	16	8	200	0	3	3	3	268.68	192.23	1.68976	653.443
1294	CN(C)C1=NC2=C(C=NC=N2)N=C1	TR	-0.09	175.195	0.4858	49.455	13	5	0	5	1	66	2	0	0	2	54.8	75.4814	2.61987	425.559
1295	CSC1=NC(=NC(=N1)N=[N]#N)NC(C)C	TS	-3.48	225.281	2.3556	59.1727	15	6	1	8	4	80	1	0	0	1	99.46	91.3568	3.04617	384.925
1296	CN1CCCCC1C(=O)NC2=C(C)C=CC=C2C	TR	-1.99	246.354	2.72624	74.8147	18	2	1	3	2	98	1	1	1	2	32.34	109.181	2.10948	421.87
1297	CCN(CC)C(=O)C(C)OC(=O)C1=CC=CC=C1	TR	-2.28	249.31	2.1003	69.2475	18	3	0	4	5	98	1	0	0	1	46.61	107.547	2.62247	398.76
1298	CCC1=NC2=C(N=CN=C2)N=C1CC	TR	-0.18	188.234	1.5446	53.884	14	4	0	4	2	72	2	0	0	2	51.56	82.4514	2.68764	410.316
1299	CC12CCC3C(=CCC4=C3C=CC(=C4)O)C1CCC2=O	TS	-4.99	268.356	3.7375	77.7068	20	2	1	2	0	104	1	2	3	4	37.3	119.059	1.77424	628.305
1300	CC#CC1=NC(=NC(=C1)C)NC2=CC=CC=C2	TS	-4.6	223.279	2.90002	69.0457	17	3	1	3	2	84	2	0	0	2	37.81	100.937	2.28933	565.011
1301	CCC1=NC2=C(N=C1CC)C(=O)NC(=O)N2	TS	-2.39	220.232	0.1312	59.5354	16	4	2	6	2	84	2	0	0	2	91.5	90.7745	2.88445	641.29
1302	CCC(C)C1=C(OC(C)=O)C(=CC(=C1)[N+]([O-])=O)[N+]([O-])=O	TR	-2.25	282.252	2.9418	69.7658	20	6	0	8	5	108	1	0	0	1	112.58	114.202	3.6073	569.311
1303	CC12CCC3=C(C=CC4=C3C=CC(=C4)O)C1CCC2=O	TR	-4.96	266.34	3.9444	79.0228	20	2	1	2	0	102	2	1	2	4	37.3	117.977	1.94984	731.521
1304	CC1CCC2=CC(=CC3=C2N1C=C(C(O)=O)C3=O)F	TR	-3.74	261.252	2.346	68.1573	19	3	1	5	1	98	2	0	1	3	59.3	107.644	2.53443	763.356
1305	ClC1=CC=C(C=C1)C(C2=C(Cl)C=CC=C2)C(Cl)(Cl)Cl	V	-7.13	354.491	6.4955	85.037	19	0	0	5	2	100	2	0	0	2	0	136.735	2.54665	556.794
1306	CCN1C=C(C(O)=O)C(=O)C2=C1C=C(N3CCNCC3)C(=C2)F	TR	-2.76	319.336	1.2683	85.882	23	5	2	7	3	122	2	1	1	3	74.57	131.684	2.24358	825.411
1307	CC(C)C1(C)N=C(NC1=O)C2=NC3=C(C=CC=C3)C=C2C(O)=O	TS	-3.72	311.341	2.2241	86.625	23	4	2	6	3	118	2	0	1	3	91.65	132.809	2.21579	857.282
1308	COC1=CC2=C(C=C1OC)C34CCN5CC6=CCOC7CC(=O)N2C3C7C6CC45	TR	-2.79	394.471	2.1097	106.513	29	5	0	6	2	152	1	4	6	7	51.24	169.933	1.52193	973.87
1309	ClC1=CC(=C(Cl)C(=C1Cl)Cl)OC2=CC(=C(Cl)C(=C2Cl)Cl)Cl	V	-10.1	445.771	8.7061	93.038	21	1	0	9	2	112	2	0	0	2	9.23	160.028	2.53865	666.673
1310	ClC1=CC2=C(C(=C1Cl)Cl)C3=C(O2)C(=C(Cl)C(=C3)Cl)Cl	TS	-10.3	374.865	7.5064	83.78	19	1	0	7	0	98	3	0	0	3	13.14	137.409	2.62054	835.699
1311	OCC1OC2OC3C(O)C(O)C(OC3CO)OC4C(O)C(O)C(OC4CO)OC5C(O)C(O)C(OC5CO)OC6C(O)C(O)C(OC6CO)OC7C(O)C(O)C(OC7CO)OC1C(O)C2O	TR	-0.91	972.846	-13.0548	195.8	66	30	18	30	6	384	0	22	22	22	474.9	372.13	1.19025	1233.49
1312	CC1CC2=C(C=CC=C2)N1NC(=O)C3=CC(=C(Cl)C=C3)[S](N)(=O)=O	TR	-3.79	365.842	2.0834	92.3784	24	4	2	8	3	126	2	0	1	3	92.5	144.788	1.88855	914.534
1313	CN1CCN(CC1)C2=CC3=C(C=C2F)C(=O)C(=CN3C4=CC=C(F)C=C4)C(O)=O	TS	-3.82	399.397	2.7189	106.13	29	5	1	8	3	150	3	1	1	4	65.78	164.752	1.97109	1150.53
1314	OCC1OC2OC3C(O)C(O)C(OC3CO)OC4C(O)C(O)C(OC4CO)OC5C(O)C(O)C(OC5CO)OC6C(O)C(O)C(OC6CO)OC7C(O)C(O)C(OC7CO)OC8C(O)C(O)C(OC8CO)OC1C(O)C2O	/	-1.84	1134.99	-15.2306	228.434	77	35	21	35	7	448	0	21	21	21	554.05	433.924	1.07641	1467.09
1315	OCC1OC2OC3C(O)C(O)C(OC3CO)OC4C(O)C(O)C(OC4CO)OC5C(O)C(O)C(OC5CO)OC6C(O)C(O)C(OC6CO)OC7C(O)C(O)C(OC7CO)OC8C(O)C(O)C(OC8CO)OC9C(O)C(O)C(OC9CO)OC1C(O)C2O	TR	-0.75	1297.13	-17.4064	261.067	88	40	24	40	8	512	0	30	30	30	633.2	495.717	0.975394	1704.41
1316	CCCCCCCCCCCCCC	TR	-7.456	198.394	5.7074	66.752	14	0	0	0	11	86	0	0	0	0	0	91.4835	2.78477	74.0391
1317	CCOC=C	V	-0.858	72.107	1.1664	21.823	5	1	0	1	2	30	0	0	0	0	9.23	32.258	2.40172	24.8289
1318	CO[P](=O)(OC)OC=C(Cl)Cl	TR	-1.344	220.976	2.6804	42.4985	11	4	0	7	4	66	0	0	0	0	44.76	74.6413	4.10254	180.531
1319	CCO[P](=S)(OCC)O\N=C(C#N)\C1CCCCC1	TR	-4.63	298.304	3.22838	77.214	19	6	0	7	7	102	1	0	0	1	63.84	117.584	2.88095	503.456
1320	CSC1=NN=C(C(=O)N1N)C(C)(C)C	TR	-2.245	214.294	0.3715	56.9234	14	6	1	6	1	78	1	0	0	1	73.8	86.6881	3.39709	393.308
1321	CCN(CC)C1nC(C)CC(O[P](=S)(OC)OC)n1	TR	-4.133	305.34	2.52732	79.261	19	7	0	8	7	108	1	0	0	1	56.71	118.906	3.06072	460.499
1322	CC1(C)[C@@H](C=C(Cl)Cl)[C@H]1C(=O)OCC2CCCC(OC3CCCCC3)C2	V	-6.99	391.294	6.1133	103.304	26	3	0	5	6	136	2	1	1	3	35.53	163.073	1.59218	811.016
1323	FC(F)(F)C1CCCCC1	TS	-2.511	146.111	2.7054	31.444	10	0	0	3	0	54	1	0	0	1	0	56.293	2.96604	199.841
1324	CCCCCCCCCCCCN1CCCC1=O	TR	-4.67	253.43	4.5297	77.658	18	1	0	2	11	106	0	1	1	1	20.31	113.129	1.77078	215.143
1325	CNC1CCCC2C(=O)C3CCCCC3C(=O)C12	V	-6.3	237.258	2.5037	69.2957	18	3	1	3	1	88	2	0	1	3	46.17	104.45	2.33888	673.944
1326	CN1[C@@H]2CC(C[C@H]1C3OC23)OC(=O)[C@H](CO)C4CCCCC4	TR	-0.504	303.358	0.9181	79.3828	22	5	1	5	4	118	1	3	3	4	62.3	129.371	1.42	545.037
1327	C[C@]12CC[C@@H](O)C[C@@H]1CC[C@@H]3[C@@H]2CC[C@@]4(C)[C@H]3CCC4=O	TS	-4.402	290.447	3.9591	82.7408	21	2	1	2	0	118	0	4	4	4	37.3	128.241	1.63754	458.483
1328	C[C@]12CC[C@H]3[C@@H](CC=C4C[C@@H](O)CC[C@]34C)[C@@H]1CCC2=O	TR	-4.122	288.431	3.8792	82.7168	21	2	1	2	0	116	0	3	4	4	37.3	127.551	1.69235	507.696
1329	CCC(=O)C1CCC(N)CC1	V	-2.627	149.193	1.8615	45.4759	11	2	1	2	2	58	1	0	0	1	43.09	66.0276	2.89535	250.77
1330	ClC=C	V	-1.36	62.499	1.3687	16.05	3	0	0	1	0	18	0	0	0	0	0	24.7179	2.1875	10.2647
1331	FC=C	TR	-0.276	46.044	1.0994	11.305	3	0	0	1	0	18	0	0	0	0	0	18.5801	2.1875	10.2647
1332	FC(F)(F)C(F)(F)Cl	TR	-3.411	154.465	2.3803	16.855	8	0	0	6	0	50	0	0	0	0	0	46.2351	4.02039	65.4099
1333	CCC(C)C	TS	-3.163	72.151	2.0524	25.129	5	0	0	0	1	32	0	0	0	0	0	34.199	2.53954	14
1334	CC(C)[N+]([O-])=O	TR	-0.615	89.094	0.6715	22.1304	6	2	0	3	1	36	0	0	0	0	43.14	36.1221	3.25759	59.8135
1335	CC(C)(O)C1CCC(C)(O)CC1	V	-1.634	172.268	1.6985	48.8796	12	2	2	2	1	72	0	1	1	1	40.46	74.6064	2.46886	145.712
1336	CCC(C(CC)C1CCC(O)CC1)C2CCC(O)CC2	TR	-4.353	270.372	4.7852	82.2776	20	2	2	2	5	106	2	0	0	2	40.46	120.267	2.31632	476.85
1337	ClCC(Br)CBr	TR	-2.374	236.334	2.3836	37.229	6	0	0	3	2	38	0	0	0	0	0	59.5075	2.75418	27.9742
1338	C(OCC1CCCCC1)C2CCCCC2	TS	-3.695	198.265	3.4034	61.377	15	1	0	1	4	76	2	0	0	2	9.23	90.3319	1.80958	341.098
1339	CCCOC(=O)CCC	TS	-1.905	130.187	1.7397	36.158	9	2	0	2	4	54	0	0	0	0	26.3	56.204	3.06132	78.9853
1340	CCCC(C)C	V	-3.74	86.178	2.4425	29.746	6	0	0	0	2	38	0	0	0	0	0	40.564	2.62721	21.2193
1341	CC(C)CC(O)CC(C)C	TR	-2.159	144.258	2.4395	44.9168	10	1	1	1	4	62	0	0	0	0	20.23	64.453	3.33743	66.7975
1342	C=COC=C	TR	-1.261	70.091	1.29	21.479	5	1	0	1	2	28	0	0	0	0	9.23	31.5684	2.65316	32.9126
1343	NCCNCCNCCN	TR	0.835	146.238	-1.917	43.8482	10	4	4	4	7	62	0	0	0	0	76.1	62.3435	2.6476	49.7095
1344	NCCNCCNCCNCCN	TR	0.723	189.307	-2.3274	56.7179	13	5	5	5	10	80	0	0	0	0	88.13	80.6232	2.75815	78.6036
1345	FC1(F)C(F)(F)C(F)(F)C1(F)F	TR	-3.638	200.028	2.5412	19.788	12	0	0	8	0	72	0	1	1	1	0	60.1525	3.15959	151.098
1346	OCC(CO)(CO)[N+]([O-])=O	TR	0.821	151.118	-2.0212	30.9828	10	5	3	6	4	60	0	0	0	0	103.83	56.8698	4.30562	112.552
1347	FC1CCCCC1F	TR	-2	114.094	1.9648	26.358	8	0	0	2	0	42	1	0	0	1	0	45.7625	3.13486	162.638
1348	O[S](=O)(=O)C[S](O)(=O)=O	TR	0.754	176.171	-1.2805	27.9642	9	4	2	8	2	56	0	0	0	0	108.74	51.9965	4.45823	236.18
1349	CCOC(=O)C(O)(C1CCC(Cl)CC1)C2CCC(Cl)CC2	TR	-4.512	325.191	3.7924	82.5358	21	3	1	5	4	110	2	0	0	2	46.53	132.624	2.55454	575.475
1350	CN1C2CCC1CC(C2)OC(=O)C3CCCCC3	TR	-2.369	245.322	2.4686	69.4525	18	3	0	3	2	96	1	2	2	3	29.54	107.739	1.62908	417.38
1351	CCCCCOC(=O)CCC	TS	-2.467	158.241	2.5199	45.392	11	2	0	2	6	66	0	0	0	0	26.3	68.9339	3.04043	99.7359
1352	CC(=O)NCC(O)=O	TR	-0.649	117.104	-0.7929	26.3195	8	2	2	4	2	46	0	0	0	0	66.4	46.5012	3.18185	95.8511
1353	BrC1CCC(I)CC1	TR	-4.452	282.906	3.0537	46.859	8	0	0	2	0	42	1	0	0	1	0	70.5608	3.03246	147.388
1354	CC(C)C(C)(C)O	TR	-0.411	102.177	1.4133	31.1358	7	1	1	1	1	44	0	0	0	0	20.23	45.3582	3.5412	49.6906
1355	CCCC(C)(O)CC	TS	-1.001	116.204	1.9475	35.8228	8	1	1	1	3	50	0	0	0	0	20.23	51.7231	3.37338	57.4072
1356	O=C1C=CNC2CCCCC12	TR	-1.481	145.161	1.5281	44.5687	11	1	1	2	0	54	2	0	0	2	32.86	63.4942	3.03079	425.261
1357	IC1CCCCC1I	TR	-4.217	329.906	2.8958	51.876	8	0	0	2	0	42	1	0	0	1	0	75.9551	3.13486	162.638
1358	CCCC(C)Cl	TR	-2.63	106.596	2.4138	30.223	6	0	0	1	2	38	0	0	0	0	0	44.5023	2.62721	25.1194
1359	IC1CCCC(I)C1	TR	-4.518	329.906	2.8958	51.876	8	0	0	2	0	42	1	0	0	1	0	75.9551	3.07766	166.388
1360	ClC1CCCCC1Br	TS	-3.203	191.455	3.1025	39.152	8	0	0	2	0	42	1	0	0	1	0	61.6022	3.13486	164.638
1361	OC(=O)C1(O)C2CCCCC2C3CCC(Cl)CC13	TS	-4.161	260.676	2.6409	67.5226	18	2	2	4	1	90	2	0	1	3	57.53	108.266	2.42405	665.839
1362	CCCCCCCC#C	TR	-4.094	124.227	2.9801	42.209	9	0	0	0	5	52	0	0	0	0	0	58.658	2.68806	76.5293
1363	C\C(Cl)=C/C(O)=O	TS	-0.605	120.535	1.2136	27.2458	7	1	1	3	1	40	0	0	0	0	37.3	46.4035	3.67923	102.257
1364	CC(C)=C[C@@H]1[C@@H](C(=O)OCN2C(=O)C3=C(CCCC3)C2=O)C1(C)C	TS	-4.858	331.412	2.9649	88.498	24	4	0	5	4	130	0	1	3	3	63.68	142.269	1.61158	638.854
1365	COC(=O)NC1CCCC(OC(=O)NC2CCCC(C)C2)C1	V	-4.779	300.314	3.78422	83.2954	22	4	2	6	3	114	2	0	0	2	76.66	127.598	1.99106	685.351
1366	CCCCOCN(C(=O)CCl)C1C(CC)CCCC1CC	TR	-4.193	311.853	4.1574	89.131	21	2	0	4	9	118	1	0	0	1	29.54	132.784	3.04059	426.166
1367	CCCCC1=C(C)NC(=NC1=O)NCC	TR	-3.02	209.293	1.85272	62.3704	15	3	2	4	5	84	1	0	0	1	57.78	90.1367	2.93733	370.586
1368	CCNC1nC(NC(C)CC)nC(OC)n1	TR	-2.575	225.296	1.5224	63.9184	16	6	2	6	6	90	1	0	0	1	71.96	95.8582	2.85273	330.985
1369	CNC(=O)N(C)C1sC(nn1)C(C)(C)C	TR	-1.997	228.321	1.6112	61.4677	15	4	1	6	1	84	1	0	0	1	58.12	93.5053	2.89463	355.239
1370	CCO[P](=S)(NC(C)CC)OC1CC(C)CCC1[N+]([O-])=O	TR	-4.814	332.362	3.93112	87.2611	21	5	1	8	8	118	1	0	0	1	73.63	129.765	3.11239	552.973
1371	CC\1=C(CC(O)=O)C2CC(F)CCC2C1=C\C3CCC(CC3)[S](C)=O	TS	-4.552	356.418	4.3655	97.8922	25	2	1	5	4	128	2	0	1	3	54.37	147.519	2.10111	939.914
1372	CCOC(=O)\C=C(C)\C=C\CC(C)CCCC(C)C	TR	-5.693	266.425	4.9045	82	19	2	0	2	9	110	0	0	0	0	26.3	118.474	3.90171	300.384
1373	CC(C)OC(=O)[C@H](C)N(C(=O)C1CCCCC1)C2CCC(F)C(Cl)C2	V	-4.561	363.816	4.466	95.3515	25	3	0	6	5	132	2	0	0	2	46.61	150.708	2.45078	764.519
1374	CCN(CC1C(F)CCCC1Cl)C2C(CC(CC2[N+]([O-])=O)C(F)(F)F)[N+]([O-])=O	V	-6.625	421.734	5.3408	92.8868	28	5	0	12	6	150	2	0	0	2	89.52	159.979	2.72555	881.336
1375	NC1nC(N)nC(NC2CC2)n1	V	-1.179	166.188	-0.3897	45.2965	12	6	3	6	2	64	1	1	1	2	102.74	69.409	2.17705	273.84
1376	C1CCCC1	/	-2.64	70.135	1.9505	23.085	5	0	0	0	0	30	0	1	1	1	0	33.1932	2.08333	11.6096
1377	CCC(C)(C)C	V	-3.55	86.178	2.4425	29.746	6	0	0	0	0	38	0	0	0	0	0	40.564	3.16849	29.7932
1378	C1CCCCC1	TR	-3.1	84.162	2.3406	27.702	6	0	0	0	0	36	0	1	1	1	0	39.5581	2	15.5098
1379	C1CC(C)CC(C)C1C	TR	-3.31	120.195	2.61186	40.653	9	0	0	0	0	48	1	0	0	1	0	56.5262	3.17168	211.278
1380	C1CC(CC)CCC1CC	V	-3.75	134.222	2.8114	45.198	10	0	0	0	2	54	1	0	0	1	0	62.8912	2.79725	160.698
1381	C1CC(C)CCC1C(C)C	V	-3.77	134.222	3.11842	45.268	10	0	0	0	1	54	1	0	0	1	0	62.8912	2.89376	193.783
1382	C1CCCCC1CC2CCCCC2	TR	-4.17	168.239	3.2774	55.69	13	0	0	0	2	64	2	0	0	2	0	78.8534	2.16148	310.812
1383	C(C(C(C1CCC2)C2)CCC3)(C3)C1	TR	-4.91	166.223	3.2578	54.684	13	0	0	0	0	62	2	0	1	3	0	77.8476	2.32073	411.6
1384	C1CCC2C(C)CCCC2C1C	TS	-4.74	156.228	3.45664	53.422	12	0	0	0	0	60	2	0	0	2	0	72.843	2.94337	372.058
1385	CC1C(C)CC2CCCCC2C1	V	-4.72	156.228	3.45664	53.422	12	0	0	0	0	60	2	0	0	2	0	72.843	2.83952	372.808
1386	C1CCC2CCCC3C2C1CC3	TR	-4.63	154.212	2.9384	51.356	12	0	0	0	0	58	2	0	1	3	0	71.8371	2.58041	401.983
1387	C(C(C(C(C1CCC2)C2)C)CCC3)(C3)C1	TR	-5.89	192.261	4.30142	66.191	15	0	0	0	0	72	3	0	0	3	0	89.1597	2.59797	581.657
1388	ClCCl	TR	-0.63	84.933	1.4215	16.573	3	0	0	2	0	20	0	0	0	0	0	29.3458	1.63299	2.75489
1389	ClC(Br)Cl	V	-1.54	163.829	2.1425	24.421	4	0	0	3	0	26	0	0	0	0	0	43.2133	2.32379	10.7549
1390	ClC(Br)Br	TR	-1.9	208.28	2.2986	27.495	4	0	0	3	0	26	0	0	0	0	0	46.7776	2.32379	10.7549
1391	BrCCBr	TR	-1.68	187.862	1.7762	27.588	4	0	0	2	1	26	0	0	0	0	0	42.8393	1.97474	6
1392	CCCCCl	TS	-2.03	92.569	2.0253	25.628	5	0	0	1	2	32	0	0	0	0	0	38.1373	2.19061	11.1194
1393	ClC=C(Cl)Cl	TR	-1.96	131.389	2.5017	25.642	5	0	0	3	0	30	0	0	0	0	0	45.3244	3.1432	42.8548
1394	C1CCCCC1C2CC(Cl)CCC2	V	-4.88	188.657	4.007	56.888	13	0	0	1	1	64	2	0	0	2	0	82.7918	2.47519	392.879
1395	C1CCCCC1C2C(Cl)CCCC2Cl	TS	-5.21	223.102	4.6604	61.898	14	0	0	2	1	70	2	0	0	2	0	93.095	2.62531	415.08
1396	C1CCCCC1C2C(Cl)CC(Cl)C(Cl)C2	TR	-6.27	257.547	5.3138	66.908	15	0	0	3	1	76	2	0	0	2	0	103.398	2.59027	477.726
1397	C1C(Cl)C(Cl)CC(Cl)C1C2C(Cl)CC(Cl)C(Cl)C2	TR	-8.56	360.882	7.274	81.938	18	0	0	6	1	94	2	0	0	2	0	134.308	2.69155	564.95
1398	OCC(C)C	V	0.04	74.123	0.6347	21.9238	5	1	1	1	1	32	0	0	0	0	20.23	32.6283	2.53954	17.6096
1399	OCC(CCC)C	TS	-1.11	102.177	1.4149	31.1578	7	1	1	1	3	44	0	0	0	0	20.23	45.3582	2.83182	35.1613
1400	CCC(C)(C)CO	V	-1.04	102.177	1.4149	31.1578	7	1	1	1	2	44	0	0	0	0	20.23	45.3582	3.36044	42.1417
1401	OCC(CC)CC	TR	-1.17	102.177	1.4149	31.1578	7	1	1	1	3	44	0	0	0	0	20.23	45.3582	2.9923	25.6515
1402	CC(O)(C)C(C)CC	TR	-0.89	116.204	1.8034	35.7528	8	1	1	1	2	50	0	0	0	0	20.23	51.7231	3.62328	61.2773
1403	OC(CC)(CC)CC	V	-0.85	116.204	1.9475	35.8228	8	1	1	1	3	50	0	0	0	0	20.23	51.7231	3.58321	47.1425
1404	CCC=O	V	0.58	58.08	0.5953	16.355	4	1	0	1	1	24	0	0	0	0	17.07	25.6307	2.29684	17.2451
1405	CCCCC=O	TS	-0.85	86.134	1.3755	25.589	6	1	0	1	3	36	0	0	0	0	17.07	38.3605	2.4884	32.9197
1406	O=CCCCCC	TS	-1.3	100.161	1.7656	30.206	7	1	0	1	4	42	0	0	0	0	17.07	44.7255	2.55878	41.4447
1407	O=C(CC)C	TS	0.52	72.107	0.9854	20.972	5	1	0	1	1	30	0	0	0	0	17.07	31.9956	2.84738	38.9126
1408	O=C(CCC)C	TS	-0.19	86.134	1.3755	25.589	6	1	0	1	2	36	0	0	0	0	17.07	38.3605	2.83126	47.9001
1409	O=C(CCCC)C	V	-0.8	100.161	1.7656	30.206	7	1	0	1	3	42	0	0	0	0	17.07	44.7255	2.82194	57.2004
1410	O=C(O)CCCCCCC	TR	-2.3	144.214	2.4315	41.0118	10	1	1	2	6	60	0	0	0	0	37.3	62.2496	2.83859	89.2584
1411	O=C(O)CC(CCCC1)C1	V	-0.89	136.15	1.3137	37.7818	10	1	1	2	2	52	1	0	0	1	37.3	59.117	2.67424	215.959
1412	O=COCCC	V	-0.49	88.106	0.5694	22.307	6	2	0	2	3	36	0	0	0	0	26.3	37.1091	2.4884	34.5293
1413	O=C(OCCC)C	TR	-0.72	102.133	0.9595	26.924	7	2	0	2	2	42	0	0	0	0	26.3	43.4741	2.82194	59.1005
1414	O=C(OCC)CC(=O)OCC	V	-0.82	160.169	0.5027	37.883	11	4	0	4	4	64	0	0	0	0	52.6	65.479	3.48996	125.376
1415	O=C(OC)C=C	V	-0.22	86.09	0.3454	22.213	6	2	0	2	1	34	0	0	0	0	26.3	36.4195	3.23439	65.9483
1416	O=C(OCC)C=C	TR	-0.74	100.117	0.7355	26.83	7	2	0	2	2	40	0	0	0	0	26.3	42.7845	3.1729	76.1493
1417	O=C(OC)C(=C)C	V	-0.8	100.117	0.7355	26.83	7	2	0	2	1	40	0	0	0	0	26.3	42.7845	3.57792	94.2533
1418	O=C(OCC)C(C(CCC1)C(=O)OCC)C1	TS	-2.35	222.24	2.04	58.355	16	4	0	4	4	86	1	0	0	1	52.6	94.1712	2.99751	347.36
1419	O=C(OCC(CCCC1)C1)C(C(CCC2)C(=O)OCCCC)C2	TS	-5.64	312.365	4.0005	87.194	23	4	0	4	7	120	2	0	0	2	52.6	135.593	2.03395	649.429
1420	CCOCCOCC	TR	-0.77	118.176	1.0594	32.986	8	2	0	2	5	50	0	0	0	0	18.46	50.7911	2.53006	31.5098
1421	C1CCCCC1OC2CCCCC2	TR	-3.96	170.211	3.4789	52.958	13	1	0	1	2	64	2	0	0	2	9.23	77.602	2.16148	315.899
1422	O(CCC1)C1	TR	0.56	72.107	0.7968	20.053	5	1	0	1	0	30	0	1	1	1	9.23	31.9418	2.08333	15.2193
1423	O1C=CC=C1	TR	-0.82	68.075	1.2796	18.708	5	1	0	1	0	26	1	0	0	1	13.14	30.2257	3.125	60.1248
1424	O1CC(O)C(O)C(O)C1(O)CO	TR	0.64	180.156	-3.2198	36.008	12	6	5	6	1	72	0	1	1	1	110.38	68.6428	2.70584	162.117
1425	O=C(OC(C(C(C(C(C(C(=CC(=O)C1)C2)(C1)C)C3)C2SC(=O)C)C4)(C3)C)(C4)C5)C5	TR	-4.28	416.583	4.8523	112.21	29	5	0	5	1	158	0	4	5	5	60.44	177.135	1.55722	817.698
1426	CC(=O)C3(O)CCC4C2CCC1=CC(=O)CCC1(C)C2CCC34C	V	-4.71	330.468	3.8384	92.3408	24	3	1	3	1	132	0	3	4	4	54.37	144.442	1.69758	634.995
1427	C1=CC(=O)C=C2CCC3C4CC(C)C(O)(C(=O)CO)C4(C)CC(O)C3(F)C12C	TR	-3.77	392.467	1.8957	99.9444	28	5	3	6	2	154	0	3	4	4	94.83	163.872	1.83769	804.749
1428	O=C(O)C(CCC(O)C1)C1	TR	-1.41	138.122	1.0904	35.0661	10	2	2	3	1	52	1	0	0	1	57.53	57.5463	3.0034	237.533
1429	O=C(O)C(C(CCC1)Cl)C1	TR	-1.89	156.568	2.0382	38.4113	10	1	1	3	1	52	1	0	0	1	37.3	63.0554	3.15294	257.538
1430	ClCCOCCCl	TR	-1.12	143.013	1.4806	32.259	7	1	0	3	4	44	0	0	0	0	9.23	53.5542	2.44747	28.8708
1431	NC(CCC(C(CCC(N)C1)C1)C2)C2	V	-2.7	184.242	2.518	60.7028	14	2	2	2	1	70	2	0	0	2	52.04	83.1683	2.39651	371.58
1432	C1CCCCn1	TR	0.76	79.102	1.0816	24.237	6	1	0	1	0	30	1	0	0	1	12.89	36.6511	3	75.8611
1433	COC(=O)C1C(CC2CCC1N2C)OC(=O)C3CCCCC3	TS	-2.23	303.358	1.8677	80.3415	22	5	0	5	3	118	1	2	2	3	55.84	129.744	1.78965	559.037
1434	OC(CCC(C(=C(C(CCC(O)C1)C1)CC)CC)C2)C2	TR	-4.35	268.356	4.8286	83.6096	20	2	2	2	4	104	2	0	0	2	40.46	119.577	2.52152	536.82
1435	O=C(N(C(C(C1(C(N(C2)CC(C3C4C5OC6)=C6)C3)C2)CCC7)C7)C14)C5	TR	-3.32	334.419	2.0925	93.409	25	3	0	4	0	128	1	4	6	7	32.78	146.976	1.55242	848.053
1436	C1CCCCC1C2(CC=C)C(=O)NC(=O)NC2=O	TR	-2.18	244.25	0.8665	64.6154	18	3	2	5	3	92	1	1	1	2	75.27	103.875	2.56032	502.298
1437	OC(C(CCCC1)C1)C(NC)C	TR	-0.42	165.236	1.3279	49.9235	12	2	2	2	3	66	1	0	0	1	32.26	73.2353	2.71104	222.54
1438	C1=CC(=O)NC(=O)N1	TR	-1.48	112.088	-0.9368	27.6834	8	2	2	4	0	42	1	0	0	1	65.72	44.1937	3.50212	246.362
1439	OC(CCC(N)C1)C1	TR	-0.8	109.128	0.9744	32.5192	8	2	2	2	0	42	1	0	0	1	46.25	47.5655	3.03246	147.388
1440	O=C(NC(CCCC1)C1)C	TR	-1.33	135.166	1.645	40.7457	10	1	1	2	1	52	1	0	0	1	29.1	59.8727	2.67424	217.959
1441	COC1CCC2CC5C3C=CC(O)C4OC1C2C34CCN5C	TR	-1.52	299.37	1.5011	82.4638	22	4	1	4	1	116	1	1	4	5	41.93	129.879	1.82237	685.155
1442	CCCN(=O)=O	V	-0.8	89.094	0.6731	22.1524	6	2	0	3	2	36	0	0	0	0	43.14	36.1221	2.83126	52.7549
1443	O=N(=O)C(CCCC1)C1	V	-1.8	123.111	1.5948	33.0964	9	2	0	3	1	46	1	0	0	1	43.14	52.0844	2.98145	207.558
1444	COP(=S)(OC)SCN2C(=O)C1CCCCC1C2=O	TR	-4.1	317.328	2.4906	77.703	19	6	0	8	5	102	1	0	1	2	55.84	119.725	2.15024	534.569
1445	O=P(SCCCC)(SCCCC)SCCCC	TR	-5.14	314.522	6.6944	89.7045	17	4	0	5	12	104	0	0	0	0	17.07	119.658	3.99898	178.643
1446	O=C(O)CCC(C(C(C(C(C(C(C(C1)CC(O)C2)(C2)C)C3)C1)C4)(C3O)C)C4)C	TR	-3.95	392.58	4.4779	108.647	28	3	3	4	4	160	0	4	4	4	77.76	169.654	1.56253	605.413
1447	O=C(NC(CCC(C1)Br)C1)C	TR	-3.08	214.062	2.4075	48.4457	11	1	1	3	1	58	1	0	0	1	29.1	73.7402	2.7363	255.299
1448	O=C(NC(CCC(C1)F)C1)C	TR	-1.78	153.156	1.7841	40.7037	11	1	1	3	1	58	1	0	0	1	29.1	64.0382	2.7363	255.299
1449	O=C(NC(CCC(C1)I)C1)C	TR	-3.25	261.062	2.2496	53.4627	11	1	1	3	1	58	1	0	0	1	29.1	79.1345	2.7363	255.299
1450	O=C(NC(CCC(C1)OC)C1)C	V	-1.3	165.192	1.6536	47.2977	12	2	1	3	2	64	1	0	0	1	38.33	71.3512	2.70915	266.362
1451	CCCCOC2CC(C(=O)NCCN(CC)CC)C1CCCCC1n2	TR	-3.7	343.471	3.4853	102.267	25	4	1	5	10	136	2	0	0	2	54.46	149.932	2.14694	683.696
1452	O=C(NC1C2C3CCCC3C(C1)C2)N(C)C	TR	-3.01	222.332	2.0823	63.0517	16	1	1	3	1	90	0	3	3	3	32.34	97.5723	1.6566	302.308
1453	CC(=O)OC3(CCC4C2CCC1=CC(=O)CCC1C2CCC34C)C#C	V	-4.79	340.463	4.0633	95.423	25	3	0	3	1	134	0	3	4	4	43.37	150.126	1.64284	683.876
1454	OC1C(I)CC(C#N)CC1I	TR	-3.61	370.915	2.47308	58.2558	11	2	1	4	0	56	1	0	0	1	44.02	91.5068	3.34837	306.698
1455	CN(C)C2C1CC4C(=C(O)C1(O)C(=O)C(=C2O)C(N)=O)C(=O)C3C(O)CCCC3C4(C)O	TS	-3.12	444.44	-0.2144	109.541	32	9	6	10	2	170	1	0	3	4	181.62	182.429	2.04792	1148.58
1456	CN(C)C(=O)C(C1CCCCC1)C2CCCCC2	TR	-2.98	239.318	2.9067	73.421	18	1	0	2	3	92	2	0	0	2	20.31	107.87	2.45211	465.635
1457	CCCCCCOC(=O)C1CCC(N)CC1	TR	-3.95	221.3	3.0059	65.2789	16	3	1	3	6	88	1	0	0	1	52.32	96.601	2.27029	319.209
1458	C1C(=O)C=C2C(C)=CC3C4CCC(C(=O)C)(OC(=O)C)C4(C)CCC3C2(C)C1	V	-5.35	384.516	4.5753	106.411	28	4	0	4	2	152	0	2	4	4	60.44	167.329	1.79003	820.462
1459	C1(=O)NC(=O)NC(C(=O)O)=C1	TR	-1.93	156.097	-1.2386	34.6427	11	3	3	6	1	58	1	0	0	1	103.02	59.5144	3.42065	359.709
1460	C1C(Cl)nC2CnCnC2n1	TR	-0.87	166.571	1.0732	40.138	11	4	0	5	0	54	2	0	0	2	51.56	67.2949	2.8289	388.994
1461	C1CnC2C(SC)nCnC2n1	TS	-1.76	178.22	1.1417	46.909	12	5	0	5	1	60	2	0	0	2	51.56	73.4797	2.79097	398.033
1462	O=CC(C(O)CCC1)C1	TR	-0.86	122.123	1.2047	33.4943	9	2	1	2	1	46	1	0	0	1	37.3	52.7521	3.14798	217.911
1463	O=C(N)C(C(O)CCC1)C1	TR	-1.76	137.138	0.4911	36.6247	10	2	2	3	1	52	1	0	0	1	63.32	58.092	3.15294	257.538
1464	C1CCC(N)CC1C(=O)C	TS	-1.28	135.166	1.4714	40.8589	10	2	1	2	1	52	1	0	0	1	43.09	59.6627	3.0699	255.189
1465	CCN(CC)C(=S)SCC(Cl)=C	TR	-3.39	223.794	3.0988	62.97	12	2	0	4	4	70	0	0	0	0	3.24	89.1492	3.76628	166.441
1466	OC(=O)CC(C)(C(=O)O)C(C)(C)C(=O)O	TR	-0.29	218.205	0.6628	49.4124	15	3	3	6	5	86	0	0	0	0	111.9	86.5261	5.38276	305.724
1467	ClC1=C(Cl)C(Cl)(C2(Cl)Cl)C3CC=CC3C12Cl	V	-5.64	338.876	5.0242	71.074	16	0	0	6	0	88	0	1	3	3	0	123.447	2.32273	438.59
1468	O=C(N(C(=O)C(N(C=N1)CC(O)CO)=C12)C)N2C	TR	-0.17	254.246	-2.2131	63.3076	18	8	2	8	3	98	2	0	0	2	102.28	101.347	2.73646	696.191
1469	O=C(O)C(C(C(C(=O)O)C1)(C)C)(C1)C	TS	-1.42	200.234	1.5981	49.8836	14	2	2	4	2	80	0	1	1	1	74.6	82.9294	3.08168	281.847
1470	CNC(=O)OC1CCCC(N=CN(C)C)C1	V	-2.34	221.26	1.6262	63.3647	16	3	1	5	3	86	1	0	0	1	53.93	94.7362	2.74575	388.571
1471	CCOP(=S)(OCC)OC1CCC(CC1)S(C)=O	TR	-2.3	308.361	3.1003	76.9394	18	5	0	7	7	102	1	0	0	1	44.76	115.351	2.8093	436.861
1472	O=C(OC)CCCCCCCCCCC	TR	-4.69	214.349	4.0803	63.86	15	2	0	2	10	90	0	0	0	0	26.3	94.3936	2.95454	143.471
1473	OC(C(C(C(nC1)CCC2)C2)C1)C(N(CCC3C4C=C)C4)C3	V	-3.07	294.398	3.1646	88.4748	22	3	1	3	3	114	2	3	3	5	36.36	130.835	1.66923	693.4
1474	C1C(O)CC2CCC3C4CCC(=O)C4(C)CCC3C2(C)C1	TR	-4.4	290.447	3.9591	82.7408	21	2	1	2	0	118	0	4	4	4	37.3	128.241	1.63754	458.483
1475	C1CC(O)C2C(=O)C3=C(O)C4(O)C(=O)C(C(=O)N)=C(O)C(N(C)C)C4CC3C(O)C2C1Cl	TR	-2.52	464.858	0.2649	109.94	32	9	6	11	2	170	1	0	3	4	181.62	186.368	2.02218	1156.7
1476	COC2CCC1C(OC(=O)C1C2OC)C4N(C)CCC5CC3OCOC3C(OC)C45	TR	-3.14	413.426	2.8818	105.894	30	8	0	8	4	158	2	0	3	5	75.69	173.723	1.68523	1034.88
1477	C1CCCCC1CC	V	-2.77	106.168	2.249	35.82	8	0	0	0	1	42	1	0	0	1	0	50.1613	2.83209	141.384
1478	C(C(CC(C1CCC2)C2)CC(C3CCC4)C4)(C1)C3	TS	-8.6	228.294	5.1462	78.96	18	0	0	0	0	84	4	0	0	4	0	105.476	2.19707	728.253
1479	ClC(Cl)(Cl)Cl	TR	-2.31	153.823	2.5529	26.143	5	0	0	4	0	32	0	0	0	0	0	49.9523	3.02372	19.1194
1480	C1C(Cl)C(Cl)C(Cl)C(Cl)C1Cl	TR	-5.65	250.339	4.9536	51.492	11	0	0	5	0	60	1	0	0	1	0	88.9477	3.45555	267.264
1481	C1CCCCC1C2CCC(Cl)CC2	TR	-5.2	188.657	4.007	56.888	13	0	0	1	1	64	2	0	0	2	0	82.7918	2.42386	375.629
1482	C1CCCC(Cl)C1C2C(Cl)CCC(Cl)C2	V	-6.02	257.547	5.3138	66.908	15	0	0	3	1	76	2	0	0	2	0	103.398	2.63517	491.976
1483	C1C(Cl)CCC(Cl)C1C2C(Cl)CCCC2Cl	TR	-6.8	291.992	5.9672	71.918	16	0	0	4	1	82	2	0	0	2	0	113.702	2.71628	514.287
1484	CC(C)C(C)CO	TR	-0.39	102.177	1.2708	31.0878	7	1	1	1	2	44	0	0	0	0	20.23	45.3582	3.14421	41.4447
1485	O=C(OCC)CC	V	-0.66	102.133	0.9595	26.924	7	2	0	2	2	42	0	0	0	0	26.3	43.4741	3.00259	59.1005
1486	C1CCCCC1OC	V	-1.85	108.14	1.6952	32.994	8	1	0	1	1	42	1	0	0	1	9.23	48.9099	2.83209	145.733
1487	C1C(=O)C=C2CCC3C4CCC(C(=O)CO)C4(C)CCC3C2(C)C1	TR	-3.75	330.468	3.6959	92.2928	24	3	1	3	2	132	0	3	4	4	54.37	144.442	1.64603	606.205
1488	O=C(O)C(C(O)CCC1)C1	V	-1.82	138.122	1.0904	35.0661	10	2	2	3	1	52	1	0	0	1	57.53	57.5463	3.15294	254.783
1489	O=C(O)C(CCC(C1)Cl)C1	V	-3.31	156.568	2.0382	38.4113	10	1	1	3	1	52	1	0	0	1	37.3	63.0554	3.0034	240.288
1490	CCCCCCN	TS	-1.1	101.193	1.5254	33.1964	7	1	1	1	4	44	0	0	0	0	26.02	45.9039	2.44747	23.361
1491	CCCCCCCCN	TR	-2.75	129.247	2.3056	42.4304	9	1	1	1	6	56	0	0	0	0	26.02	58.6337	2.59508	37.8323
1492	O=C(O)C(CCC(N(=O)=O)C1)C1	V	-2.8	167.12	1.293	40.0557	12	3	1	5	2	62	1	0	0	1	80.44	67.4051	3.00615	283.683
1493	COP(=S)(OC)OC1CCC(N(=O)=O)C(C)C1	TR	-4.04	277.238	2.79932	66.7644	17	6	0	8	5	94	1	0	0	1	70.83	103.9	2.98965	470.454
1494	O=C(NC(CCC(C1)Cl)C1)C	TR	-2.84	169.611	2.2984	45.7557	11	1	1	3	1	58	1	0	0	1	29.1	70.1759	2.7363	255.299
1495	O=C(NC(CCC(C1)N(=O)=O)C1)C	TR	-2.69	180.163	1.5532	47.4001	13	3	1	5	2	68	1	0	0	1	72.24	74.5256	2.80945	331.747
1496	CC(C)N(C(C)C)C(=O)SCC(Cl)=CCl	TR	-4.08	270.225	4.2774	69.754	15	2	0	5	4	88	0	0	0	0	20.31	105.985	4.27921	233.577
1497	ClC1C(Cl)C(Cl)C(Cl)C(O)C1OC	TR	-4.02	261.919	4.0144	54.6988	13	2	1	6	1	72	1	0	0	1	29.46	94.9172	3.56376	321.831
1498	O=C(O)C(N)CC(=O)N	V	-0.74	132.119	-1.7263	29.4226	9	3	3	5	3	52	0	0	0	0	106.41	51.6311	3.63243	133.774
1499	O=C(C(CCC1C)C(C)C)C1	TR	-2.49	154.253	2.6477	46.35	11	1	0	1	1	64	0	1	1	1	17.07	69.1794	2.50769	148.952
1500	C12CCCCC1nCCC2C(O)C3N(C4)CCC(C4CC)C3	TR	-2.63	296.414	3.3886	88.5688	22	3	1	3	3	116	2	3	3	5	36.36	131.525	1.6561	666.038
1501	C1C(=O)C=C2CCC3C4CCC(O)(C#C)C4(C)CCC3C2(C)C1	TR	-5.66	312.453	3.8826	90.4928	23	2	1	2	0	124	0	3	4	4	37.3	139.28	1.70241	626.243
1502	C1CCC2OC(=O)C(C(C(=O)OCC)C3=C(O)C4CCCCC4OC3=O)=C(O)C2C1	V	-3.66	408.362	3.0056	106.774	30	8	2	8	4	152	4	0	0	4	127.18	168.108	2.08938	1296.93
1503	O=C(OCC)C(CCC(N)C1)C1	TR	-2.32	165.192	1.4455	46.8109	12	3	1	3	2	64	1	0	0	1	52.32	71.1412	2.75374	266.362
1504	O=C(OC(C(CCC1)C(=O)O)C1)C	TR	-1.72	180.159	1.3101	44.7103	13	3	1	4	2	68	1	0	0	1	63.6	74.7571	3.04353	343.223
1505	O=C1NC(=O)C(N1)(C2CCCCC2)C3CCCCC3	TS	-3.99	252.273	1.7696	70.3384	19	2	2	4	2	94	2	1	1	3	58.2	110	2.23084	583.609
1506	CC1=CC=C(S(=O)(=O)N(Cl)Cl)C=C1	V	-3.51	240.111	2.29332	51.9098	13	2	0	6	2	72	1	0	0	1	37.38	87.1468	3.17012	385.458
1507	O=C(O)COC1=C(Cl)C=C(Cl)C=C1Cl	TR	-3.23	255.484	3.1102	54.6028	14	2	1	6	3	76	1	0	0	1	46.53	95.1404	2.90817	341.844
1508	CCCCOC(=O)C1=CC=C(N)C=C1	TR	-3.06	193.246	2.2257	56.0449	14	3	1	3	4	76	1	0	0	1	52.32	83.8711	2.48107	292.661
1509	C1=CC2=C(C=C1)SC1=C(C=CC=C1)N2	TR	-5.59	199.278	3.8948	60.2897	14	2	1	2	0	68	2	0	1	3	12.03	87.1556	2.12492	391.753
1510	O=C1NC(=O)C2=C(N1)NC(=O)N2	TS	-3.62	168.112	-1.7672	40.1608	12	3	4	7	0	62	2	0	0	2	114.37	63.4657	3.1835	582.74
1511	CCC1(CC)C(=O)NC(=S)NC1=O	TR	-2.32	200.263	0.3237	51.8984	13	3	2	5	2	72	0	1	1	1	58.2	82.0696	3.00736	249.318
1512	CCCCOP(=O)(OCCCC)OCCCC	TR	-2.85	266.318	4.5446	70.1865	17	4	0	5	12	104	0	0	0	0	44.76	105.644	3.99898	175.398
1513	NCC(=O)NCC(=O)NCC(=O)O	TR	-0.53	189.171	-2.7379	42.7096	13	4	4	7	5	74	0	0	0	0	121.52	74.2824	3.51597	215.925
1514	CCC(C)C(NC(C)=O)C(=O)O	V	-0.69	173.212	0.6218	44.6955	12	2	2	4	4	70	0	0	0	0	66.4	71.961	4.22417	179.142
1515	CSCCC(NC(C)=O)C(=O)O	TR	0.03	191.252	0.3288	48.2395	12	3	2	5	5	70	0	0	0	0	66.4	75.7192	3.86542	172.034
1516	CCOC(=S)SC(CC(=O)O)C(=O)O	TR	-1.19	238.286	0.9689	55.4916	14	5	2	7	5	80	0	0	0	0	83.83	90.4359	4.15686	240.235
1517	CCCC(C)(COC(N)=O)COC(N)=O	TS	-1.74	218.253	0.9834	54.0858	15	4	2	6	6	88	0	0	0	0	104.64	88.8887	4.1656	212.152
1518	CC1=NC2=C(N=CNC2=O)NC1=O	V	-2.15	178.151	-0.68518	45.5164	13	4	2	6	0	66	2	0	0	2	91.5	71.6796	3.05645	568.45
1519	C1=CC=C2C(=C1)C=CC=C2[N+](=O)[O-]	V	-3.71	173.171	2.748	50.6024	13	2	0	3	1	64	2	0	0	2	43.14	74.766	2.83098	459.936
1520	COC1=C2OC=CC2=CC2=C1OC(=O)C=C2	TR	-3.52	216.192	2.5478	58.808	16	4	0	4	1	80	3	0	0	3	52.58	90.0339	2.59604	720.536
1521	CCCC1(CCC)C(=O)NC(=O)NC1=O	TR	-2.53	212.249	0.939	53.9304	15	3	2	5	4	84	0	1	1	1	75.27	88.6022	2.97044	271.043
1522	CCCCC1(CC)C(=O)NC(=O)NC1=O	TR	-1.67	212.249	0.939	53.9304	15	3	2	5	4	84	0	1	1	1	75.27	88.6022	2.89134	279.043
1523	C1=CC=C2C=C(C=CC2=C1)[N+](=O)[O-]	TR	-3.82	173.171	2.748	50.6024	13	2	0	3	1	64	2	0	0	2	43.14	74.766	2.68603	465.186
1524	COC1=C(OCC(O)CO)C=CC=C1	V	-0.73	198.218	0.4272	51.5816	14	4	2	4	5	78	1	0	0	1	58.92	82.7067	2.56952	274.579
1525	O=C(O)C1=C(C(=O)C2=CC=C(O)C=C2)C=CC=C1	V	-2.73	242.23	2.3214	64.9406	18	3	2	4	3	90	2	0	0	2	74.6	103.13	2.4598	599.446
1526	CCOC(=O)OC1=CC=C(NC(C)=O)C=C1	V	-2.67	223.228	2.1803	58.3957	16	4	1	5	3	86	1	0	0	1	64.63	93.3561	2.57132	372.076
1527	COC1=C(C=CC(=C1)OC2=C(C=C(C=C2)Cl)Cl)[N+](=O)[O-]	TS	-5.91	314.124	4.7025	76.1844	20	4	0	7	4	104	2	0	0	2	61.6	124.34	2.31966	660.815
1528	O=C(NC(=O)C1=C(F)C=CC=C1F)NC1=CC=C(Cl)C=C1	TR	-6.54	310.687	3.5801	74.2949	21	2	2	7	2	108	2	0	0	2	58.2	123.275	2.05565	669.623
1529	COC(=O)C1=CC=C(N(C)C)C=C1	TS	-3.05	179.219	1.5392	52.1085	13	3	0	3	2	70	1	0	0	1	29.54	77.9261	2.87093	290.298
1530	CC(C)C1=CC=C(NC(=O)N(C)C)C=C1	TR	-3.5	206.289	2.9035	63.2367	15	1	1	3	2	82	1	0	0	1	32.34	91.0923	2.68577	327.98
1531	CCN(CC)CC(=O)NC1=C(C)C=CC=C1C	V	-1.78	234.343	2.58374	72.3337	17	2	1	3	5	94	1	0	0	1	32.34	103.822	2.68027	363.559
1532	C=CCC1(C(C)CCC)C(=O)NC(=O)NC1=O	TR	-2.36	238.287	1.3511	63.0004	17	3	2	5	5	94	0	1	1	1	75.27	100.642	3.11365	342.762
1533	CCCOC(=O)C1=C(C(=O)OCCC)C=CC=C1	TR	-3.82	250.294	2.8202	67.589	18	4	0	4	6	98	1	0	0	1	52.6	106.901	2.84595	373.01
1534	CC12CCC3C4=C(C=C(O)C=C4)CCC3C1CC(O)C2O	TR	-4	288.387	2.58	80.1204	21	3	3	3	0	114	1	2	3	4	60.69	125.176	1.71027	569.582
1535	CN1C(=O)NC(=O)C(C)(C2=CCCCC2)C1=O	TR	-2.91	236.271	1.2013	60.9667	17	3	1	5	1	92	0	1	2	2	66.48	99.8466	2.40012	427.467
1536	NC1=CC2=C(S(=O)(=O)O)C=CC=C2C=C1	TR	-2.54	223.253	1.6687	58.175	15	3	2	5	1	78	2	0	0	2	80.39	87.0816	2.9228	619.6
1537	CC(=O)NC1=CC2=C(C=C1)C1=C(C=CC=C1)C2	TR	-4.24	223.275	3.2162	68.9877	17	1	1	2	1	84	2	0	1	3	29.1	100.289	2.03687	601.621
1538	O=C(O)CSC(C(=O)O)C1=CC=CC=C1	V	-1.23	226.253	1.6301	56.9126	15	3	2	5	5	80	1	0	0	1	74.6	90.9258	2.7504	349.7
1539	CC(OC1=C(Cl)C=C(Cl)C(Cl)=C1)C(=O)O	TR	-3.55	269.511	3.4987	59.1978	15	2	1	6	3	82	1	0	0	1	46.53	101.505	2.95268	392.434
1540	CC(CCC(=O)O)C1CCC2C3CC(O)C4CC(O)CCC4(C)C3CCC12C	TR	-4.82	392.58	4.4779	108.647	28	3	3	4	4	160	0	4	4	4	77.76	169.654	1.54575	605.413
1541	C=CCC1=C(OCC(O)CNC(C)C)C=CC=C1	V	-2.88	249.354	2.1528	74.9835	18	3	2	3	8	100	1	0	0	1	41.49	109.484	2.44414	363.266
1542	CCOC(=O)C1=C(C)NC(C)=C(C(=O)OC)C1C1=C(Cl)C(Cl)=CC=C1	TS	-5.68	384.259	3.9643	96.3877	25	5	1	7	4	134	1	0	1	2	64.63	156.132	2.73893	783.281
1543	COC1=CC2=C(C=C1)N(C(=O)C1=CC=C(Cl)C=C1)C(C)=C2CC(=O)O	TR	-4.77	357.793	3.92732	95.7473	25	4	1	6	4	128	3	0	0	3	68.53	148.948	2.23237	973.248
1544	OCCOC1=CC=C(OCCO)C=C1	TR	-1.23	198.218	0.4288	51.6036	14	4	2	4	6	78	1	0	0	1	58.92	82.7067	2.41948	217.804
1545	NS(=O)(=O)C1=CC2=C(S1)S(=O)(=O)CCC2O	TR	-1.65	283.352	-0.3937	57.3218	16	6	2	9	1	90	1	0	1	2	114.53	96.6811	2.7116	626.98
1546	NC(CSSCC(N)C(=O)O)C(=O)O	TR	-3.31	240.306	-0.8084	56.1384	14	6	4	8	7	82	0	0	0	0	126.64	88.8014	3.46818	192.008
1547	CC1=NC=C(N1CCO)[N+](=O)[O-]	V	-1.21	171.156	0.09202	40.7042	12	5	1	6	3	66	1	0	0	1	81.19	68.6122	3.03286	294.228
1548	CCNC1=NC(Cl)=NC(NC(C)C)=N1	TR	-3.76	215.688	1.7771	57.7594	14	5	2	6	4	78	1	0	0	1	62.73	88.318	2.83196	301.783
1549	C1=CC=C(CNC2=NC=NC3=C2N=CN3)C=C1	TR	-3.6	225.255	1.965	65.4524	17	4	2	5	3	84	3	0	0	3	66.49	97.9531	1.83503	616.887
1550	CCN1C=C(C(=O)O)C(=O)C2=C1C=C1OCOC1=C2	TR	-4.38	261.233	1.4483	66.9643	19	5	1	6	2	98	2	0	1	3	77.76	107.341	2.4291	746.762
1551	CCCC(=O)OCN1C(=O)NC(C2=CC=CC=C2)(C2=CC=CC=C2)C1=O	TR	-4.68	352.39	2.7828	94.9087	26	4	1	6	6	134	2	1	1	3	75.71	151.31	1.9727	765.576
1552	CCOC(=O)C(C)C1=CC2=CC=C(OC)C=C2C=C1	TR	-5.24	258.317	3.515	75.548	19	3	0	3	4	100	2	0	0	2	35.53	112.691	2.33429	589.564
1553	CC1=C(N)C=CC(N=NC2=C(C)C=CC=C2)=C1	V	-4.05	225.295	4.30104	70.9464	17	3	1	3	2	86	2	0	0	2	50.74	101.005	2.26273	559.144
1554	CN1C(=O)CN=C(C2=CC=CC=C2)C2=C1C=CC(Cl)=C2	TS	-3.71	284.746	3.1538	81.81	20	2	0	4	1	100	2	0	1	3	32.67	122.062	2.22996	694.878
1555	C1C(=O)NC2=C(C=C(C=C2)[N+](=O)[O-])C(=N1)C3=CC=CC=C3Cl	V	-4.41	315.716	3.0377	83.6841	22	4	1	7	2	110	2	0	1	3	84.6	130.14	2.2336	817.43
1556	NS(=O)(=O)C1=C(Cl)C=C(NCC2=CC=CO2)C(C(=O)O)=C1	TR	-3.83	330.749	1.8907	75.8192	21	5	3	9	5	112	2	0	0	2	122.63	124.922	2.40663	771.196
1557	CCC1(C2=CC=CC=C2)NC(=O)NC1=O	TR	-2.64	204.229	1.1313	55.0854	15	2	2	4	2	78	1	1	1	2	58.2	87.6731	2.46902	402.309
1558	NC(CC1=CNC2=C1C=CC=C2)C(=O)O	TR	-1.77	204.229	1.1223	57.6139	15	2	3	4	3	78	2	0	0	2	79.11	86.7127	2.32349	490.049
1559	CCCC(C)C1(CC)C(=O)NC(=O)NC1=O	TR	-2.39	226.276	1.185	58.4774	16	3	2	5	4	90	0	1	1	1	75.27	94.9671	3.04603	305.191
1560	OC1=CC=C(N=NC2=CC=CC=C2)C=C1	V	-3.95	198.225	3.8076	58.7248	15	3	1	3	2	74	2	0	0	2	44.95	87.7295	2.15299	448.808
1561	OC1=CC(O)=C(N=NC2=CC=CC=C2)C=C1	TR	-3.08	214.224	3.5132	60.3896	16	4	2	4	2	80	2	0	0	2	65.18	92.5237	2.24215	509.682
1562	CC1(C)SC2C(NC(=O)COC3=CC=CC=C3)C(=O)N2C1C(=O)O	TR	-2.81	350.396	0.6971	87.5955	24	5	2	8	5	128	1	2	2	3	95.94	142.894	1.58595	678.305
1563	BrC1CC(Br)C(Br)CC1Br	TR	-6.98	393.698	4.7366	57.242	10	0	0	4	0	54	1	0	0	1	0	92.9016	3.28246	205.92
1564	FC(F)(Cl)C(F)(F)Cl	TS	-2.74	170.92	2.6496	21.6	8	0	0	6	1	50	0	0	0	0	0	52.3729	4.02039	67.0196
1565	CC12CCC(CC1)C(C)(C)O2	TS	-1.74	154.253	2.7441	45.527	11	1	0	1	0	64	0	3	3	3	9.23	69.1256	2.22399	160.957
1566	CCC=C	V	-1.94	56.108	1.5824	20.488	4	0	0	0	1	24	0	0	0	0	0	27.1445	2.29684	14
1567	CCCCCCCCC=C	TS	-5.51	140.27	3.923	48.19	10	0	0	0	7	60	0	0	0	0	0	65.3341	2.70379	64.4386
1568	CCCO	TS	0.62	60.096	0.3887	17.3768	4	1	1	1	1	26	0	0	0	0	20.23	26.2634	1.97474	5.24511
1569	ClC1C(Cl)C(Cl)C(C(Cl)C1Cl)C2C(Cl)C(Cl)C(Cl)C(Cl)C2Cl	V	-11.6	498.662	9.8876	101.978	22	0	0	10	1	118	2	0	0	2	0	175.521	3.02691	669.96
1570	ClC1CC(Cl)C(CC1Cl)C2CCCC(Cl)C2Cl	V	-7.21	326.437	6.6206	76.928	17	0	0	5	1	88	2	0	0	2	0	124.005	2.68587	577.349
1571	ClC1CCC(C(Cl)C1)C2C(Cl)CCC(Cl)C2Cl	TR	-7.43	326.437	6.6206	76.928	17	0	0	5	1	88	2	0	0	2	0	124.005	2.72152	577.349
1572	OC1C(Cl)CC(Cl)C(Cl)C1Cl	TR	-3.1	231.893	4.0058	48.1468	11	1	1	5	0	60	1	0	0	1	20.23	83.4387	3.45555	270.874
1573	ClC1CCC(CC1)C2CCCC(Cl)C2Cl	TS	-6.29	257.547	5.3138	66.908	15	0	0	3	1	76	2	0	0	2	0	103.398	2.54151	474.726
1574	ClC1CCC(CC1)C2CC(Cl)CCC2Cl	V	-6.27	257.547	5.3138	66.908	15	0	0	3	1	76	2	0	0	2	0	103.398	2.53059	474.726
1575	OC1C(Cl)CCCC1Cl	TS	-1.79	163.003	2.699	38.1268	9	1	1	3	0	48	1	0	0	1	20.23	62.8322	3.24783	202.048
1576	CC(C)O	V	0.43	60.096	0.3871	17.3548	4	1	1	1	0	26	0	0	0	0	20.23	26.2634	2.32379	8
1577	CC1CCC(O)CC1C	TS	-1.38	122.167	2.00904	37.5808	9	1	1	1	0	48	1	0	0	1	20.23	54.9555	3.17168	215.808
1578	O=C1N(COC(=O)CCCCC)C(=O)C(N1)(C2CCCCC2)C3CCCCC3	TS	-5.886	380.444	3.563	104.143	28	4	1	6	8	146	2	1	1	3	75.71	164.04	1.84429	796.63
1579	CC(C)C(C)O	V	-0.18	88.15	1.0232	26.5188	6	1	1	1	1	38	0	0	0	0	20.23	38.9933	2.9935	24.9197
1580	CCC(C)CCO	TR	-0.72	102.177	1.4149	31.1578	7	1	1	1	3	44	0	0	0	0	20.23	45.3582	2.83182	35.1613
1581	O=C1NC(=O)NC(=O)C1(CC)C(C)C	TR	-2.148	198.222	0.4048	49.2434	14	3	2	5	2	78	0	1	1	1	75.27	82.2372	3.1058	276.432
1582	CCCCC(=O)CCCC	V	-2.58	142.242	2.9359	44.057	10	1	0	1	6	60	0	0	0	0	17.07	63.8203	3.08635	76.7291
1583	CNC(=O)OC1CCCC2CCCCC12	TR	-3.224	201.225	2.558	59.0317	15	2	1	3	1	76	2	0	0	2	38.33	87.6679	2.46495	488.451
1584	ClCC#N	V	-0.092	75.498	0.74878	16.333	4	1	0	2	0	22	0	0	0	0	23.79	29.8	2.4331	35.7932
1585	Cl\C=C/Cl	V	-1.3	96.944	1.9352	20.846	4	0	0	2	0	24	0	0	0	0	0	35.0211	2.54919	19.2193
1586	C/C1CCCCC1\C	V	-4.3	112.216	2.8326	36.796	8	0	0	0	0	48	0	1	1	1	0	52.288	2.2794	56.4386
1587	CC(=O)OCC(=O)C3(O)CCC4C2CCC1=CC(=O)CCC1(C)C2C(=O)CC34C	TR	-4.21	402.487	2.5606	103.69	29	6	1	6	3	158	0	3	4	4	97.74	170.609	1.6646	827.225
1588	C1CCC=CCC1	TS	-3.18	96.173	2.5067	32.225	7	0	0	0	0	40	0	0	1	1	0	45.2335	2.20293	54.4386
1589	O=C2NC(=O)C1(CCCC1)C(=O)N2	TS	-2.349	182.179	-0.0872	42.5824	13	3	2	5	0	70	0	2	2	2	75.27	74.8665	2.30798	269.764
1590	NC1CCC(CC1)S(=O)(=O)C2CCC(N)CC2	TR	-3.094	248.307	1.6838	67.1606	17	4	2	5	2	88	2	0	0	2	86.18	99.7937	2.49613	565.06
1591	CCSSCC	V	-2.42	122.258	2.4076	36.264	6	2	0	2	3	38	0	0	0	0	0	47.4803	2.33909	17.5098
1592	CCCCCCOC(=O)C1CCCCC1C(=O)OCCCCCC	TR	-6.144	334.456	5.1608	95.291	24	4	0	4	12	134	1	0	0	1	52.6	145.091	2.50168	451.167
1593	CCN(CC(C)=C)C1C(CC(CC1N(=O)=O)C(F)(F)F)N(=O)=O	V	-6.124	333.266	3.9242	77.4538	23	5	0	10	6	126	1	0	0	1	89.52	128.859	3.74076	623.35
1594	CCCCCC(=O)OCC	TR	-2.35	144.214	2.1298	40.775	10	2	0	2	5	60	0	0	0	0	26.3	62.5689	3.05238	89.2584
1595	NC1nC(=O)[nH]CC1F	TS	-0.972	129.094	-0.5088	29.2281	9	3	2	5	0	48	1	0	0	1	71.77	49.5376	3.33609	268.76
1596	NS(=O)(=O)C2CC1C(NCNS1(=O)=O)CC2Cl	V	-2.63	297.745	-0.3513	61.6364	17	5	3	10	1	94	1	0	1	2	118.36	103.055	2.79049	683.316
1597	CC12CC(O)C3C(CCC4=CC(=O)CCC34C)C2CCC1(O)C(=O)CO	TR	-3.09	362.466	1.7816	95.1424	26	5	3	5	2	144	0	3	4	4	94.83	154.031	1.73508	683.889
1598	IC1CCCCC1	TR	-3.01	204.01	2.2912	39.159	7	0	0	1	0	36	1	0	0	1	0	56.6932	3.02147	134.107
1599	COC2C1oCCC1C(OC)C3C(=O)CC(C)oC23	V	-3.021	260.245	2.86482	70.097	19	5	0	5	2	98	3	0	0	3	61.81	107.877	2.68228	825.071
1600	COC(=O)C	V	0.46	74.079	0.1793	17.69	5	2	0	2	0	30	0	0	0	0	26.3	30.7442	2.84738	40.1577
1601	CCCOC(=O)CC	V	-0.82	116.16	1.3496	31.541	8	2	0	2	3	48	0	0	0	0	26.3	49.839	2.9886	68.9288
1602	CCCCCC(=O)OC	V	-1.87	130.187	1.7397	36.158	9	2	0	2	4	54	0	0	0	0	26.3	56.204	2.97306	78.9853
1603	CCCCCCCCC(=O)OC	TR	-3.38	172.268	2.91	50.009	12	2	0	2	7	72	0	0	0	0	26.3	75.2988	2.95176	110.406
1604	CCCCCCCC(=O)OC	V	-3.17	158.241	2.5199	45.392	11	2	0	2	6	66	0	0	0	0	26.3	68.9339	2.95499	99.7359
1605	CCCC(=O)OCC	TR	-1.36	116.16	1.3496	31.541	8	2	0	2	3	48	0	0	0	0	26.3	49.839	3.05517	60.9288
1606	COC(=O)C1CCC(O)CC1	TS	-1.827	152.149	1.1788	39.4463	11	3	1	3	1	58	1	0	0	1	46.53	64.2306	2.89535	250.545
1607	COC1CCC(NC(=O)N(C)C)CC1Cl	TS	-2.564	228.679	2.4421	60.7097	15	2	1	5	2	82	1	0	0	1	41.57	93.7792	2.79821	366.44
1608	COC(=O)C1=C(C)NC(=C(C1C2CCCCC2N(=O)=O)C(=O)OC)C	V	-4.76	346.339	2.1756	88.4051	25	7	1	8	4	132	1	0	1	2	107.77	143.814	2.80349	771.111
1609	CCN(=O)=O	TR	-0.22	75.067	0.283	17.5354	5	2	0	3	1	30	0	0	0	0	43.14	29.7572	2.84738	42.9126
1610	O=C2CN(N=CC1CCC(o1)N(=O)=O)C(=O)N2	TR	-3.38	238.159	0.0735	53.2011	17	6	1	9	3	88	1	1	1	2	118.05	93.8308	2.07029	519.74
1611	OC3N=C(C1CCCCC1)C2CC(Cl)CCC2NC3=O	V	-3.952	286.718	2.4479	78.1695	20	3	2	5	1	100	2	0	1	3	61.69	120.282	2.23159	698.275
1612	ClC1CCC(I)CC1	TR	-4.03	238.455	2.9446	44.169	8	0	0	2	0	42	1	0	0	1	0	66.9965	3.03246	147.388
1613	ClC1CCC(CN(C2CCCC2)C(=O)NC3CCCCC3)CC1	TR	-5.915	328.843	5.3167	94.7117	23	1	1	4	4	120	2	1	1	3	32.34	141.812	1.74279	636.179
1614	C1CCC2C(C1)CCC3C2CCC4C5CCCCC5CCC43	TS	-7.87	278.354	6.2994	96.466	22	0	0	0	0	102	5	0	0	5	0	128.158	2.04138	1071.55
1615	CC12CC(O)C3C(CCC4=CC(=O)C=CC34C)C2CCC1(O)C(=O)CO	V	-3.18	360.45	1.5576	95.0484	26	5	3	5	2	142	0	3	4	4	94.83	153.341	1.74728	723.913
1616	NC(=O)C1CnCCn1	TR	-0.667	123.115	-0.4245	30.5499	9	3	1	4	1	46	1	0	0	1	68.87	51.7371	2.98145	208.703
1617	CCCOC(=O)C1CCC(N)CC1	V	-2.452	179.219	1.8356	51.4279	13	3	1	3	3	70	1	0	0	1	52.32	77.5061	2.61117	279.481
1618	NC1CCC(CC1)S(N)(=O)=O	TS	-1.34	172.209	-0.0838	42.2276	11	3	2	5	1	60	1	0	0	1	86.18	64.872	3.20152	341.35
1619	C/C=C/C=O	TR	0.32	70.091	0.7614	20.878	5	1	0	1	1	28	0	0	0	0	17.07	31.306	2.92442	45.6096
1620	CC12CCC3C(CCC4=CC(=O)CCC34C)C2CCC1O	TR	-4.02	288.431	3.8792	82.7168	21	2	1	2	0	116	0	3	4	4	37.3	127.551	1.68835	507.696
1621	CC(=O)OC3CCC4C2CCC1=CC(=O)CCC1(C)C2CCC34C	V	-5.184	330.468	4.45	92.264	24	3	0	3	1	132	0	3	4	4	43.37	144.762	1.62133	606.205
1622	CC1(OC(=O)N(C1=O)C2CC(Cl)CC(Cl)C2)C=C	V	-4.925	286.114	3.4213	69.031	18	3	0	6	2	94	1	1	1	2	46.61	113.729	2.48235	538.004
1623	CC(C)CCCC(C)C1CCC2C3CC=C4CC(O)CCC4(C)C3CCC12C	V	-7	386.664	7.3887	119.053	28	1	1	1	5	160	0	3	4	4	20.23	174.309	1.48945	591.07
1624	FC(F)(Cl)Cl	TS	-1.99	120.913	2.0143	16.653	5	0	0	4	0	32	0	0	0	0	0	37.6769	3.02372	23.1194
1625	ClCCCl	TR	-1.08	98.96	1.464	21.44	4	0	0	2	1	26	0	0	0	0	0	35.7107	1.97474	6
1626	ClC1=CC(Cl)=C(Cl)C=C1C1=C(Cl)C(Cl)=CC(Cl)=C1Cl	TR	-8.94	395.327	7.9274	86.948	19	0	0	7	1	100	2	0	0	2	0	144.611	2.82697	637.608
1627	ClC1=C(Cl)C(Cl)=C(Cl)C(Cl)=C1Cl	TR	-7.56	284.784	5.607	56.502	12	0	0	6	0	66	1	0	0	1	0	99.251	3.60357	226.303
1628	ClC1=CC=C(C2=CC(Cl)=C(Cl)C(Cl)=C2Cl)C(Cl)=C1	TR	-8.32	360.882	7.274	81.938	18	0	0	6	1	94	2	0	0	2	0	134.308	2.71655	620.45
1629	ClC1=C(Cl)C=C2C(=C1)OC1=C(Cl)C(Cl)=C(Cl)C(Cl)=C21	TR	-10.66	374.865	7.5064	83.78	19	1	0	7	0	98	3	0	0	3	13.14	137.409	2.62637	835.699
1630	CCl	V	-0.88	50.488	0.855	11.777	2	0	0	1	0	14	0	0	0	0	0	19.0425	1	2
1631	CC12CCC(=O)C=C1CCC1C2CCC2(C)C1CCC2(C)O	V	-3.97	302.458	4.2693	87.3338	22	2	1	2	0	122	0	3	4	4	37.3	133.916	1.6968	545.91
1632	CC1=CC(=CC=C1)[N+](=O)[O-]	TS	-2.46	137.138	1.90322	37.8334	10	2	0	3	1	52	1	0	0	1	43.14	58.4493	3.0699	257.538
1633	CCOC1=CC=C(NC(C)=O)C=C1	TR	-2.3	179.219	2.0437	51.9147	13	2	1	3	3	70	1	0	0	1	38.33	77.7161	2.63597	279.481
1634	CCC	TS	-2.84	44.097	1.4163	15.965	3	0	0	0	0	20	0	0	0	0	0	21.4691	1.63299	0
1635	BrC(Br)C(Br)Br	TR	-2.72	345.654	3.2182	43.284	6	0	0	4	1	38	0	0	0	0	0	70.5744	2.9935	26.5293
1636	COC1=C(Cl)C(Cl)=C(Cl)C=C1Cl	TR	-5.13	245.92	4.3088	53.034	12	1	0	5	1	66	1	0	0	1	9.23	90.123	3.40448	310.765
1637	ClC1=CC(Cl)=C(Cl)C(Cl)=C1	TR	-4.68	215.894	4.3002	46.482	10	0	0	4	0	54	1	0	0	1	0	78.6445	3.31053	232.92
1638	ClC1=CC(Cl)=C(Cl)C=C1Cl	TS	-5.47	215.894	4.3002	46.482	10	0	0	4	0	54	1	0	0	1	0	78.6445	3.28246	205.92
1639	ClC1=CC=C(C2=CC=C(Cl)C(Cl)=C2)C=C1Cl	V	-8.53	291.992	5.9672	71.918	16	0	0	4	1	82	2	0	0	2	0	113.702	2.50208	485.037
1640	ClC1=CC=C(C2=C(Cl)C=C(Cl)C=C2Cl)C=C1	TR	-6.94	291.992	5.9672	71.918	16	0	0	4	1	82	2	0	0	2	0	113.702	2.59717	494.037
1641	ClC1=C(Cl)C(Cl)=C2OC3=CC=CC=C3OC2=C1Cl	TS	-8.77	321.974	6.1982	73.072	18	2	0	6	0	92	2	0	1	3	18.46	122.923	2.24728	599.011
1642	ClC(Cl)=C(Cl)Cl	V	-2.74	165.834	3.0682	30.438	6	0	0	4	0	36	0	0	0	0	0	55.6277	3.67595	55.6173
1643	COC1=C(Cl)C=C(Cl)C=C1Cl	TR	-4.2	211.475	3.6554	48.024	11	1	0	4	1	60	1	0	0	1	9.23	79.8197	3.24771	249.383
1644	ClC1=CC(Cl)=CC(Cl)=C1	TS	-4.6	181.449	3.6468	41.472	9	0	0	3	0	48	1	0	0	1	0	68.3412	3.16567	169.065
1645	ClC1=CC(Cl)=C2OC3=CC=CC=C3OC2=C1Cl	TR	-7.58	287.529	5.5448	68.062	17	2	0	5	0	86	2	0	1	3	18.46	112.62	2.20891	610.94
1646	CC(Cl)(Cl)Cl	V	-2.14	133.405	2.3765	25.964	5	0	0	3	0	32	0	0	0	0	0	46.014	3.02372	20.3645
1647	CCCSC(=O)N(CCC)CCC	TS	-3.3	203.351	3.3716	60.3	13	2	0	3	6	78	0	0	0	0	20.31	86.0682	3.79934	132.886
1648	ClC1=C(Cl)C(Cl)=C(Cl)C(OC2=C(Cl)C(Cl)=C(Cl)C(Cl)=C2Cl)=C1	TS	-10.55	480.216	9.3595	98.048	22	1	0	10	2	118	2	0	0	2	9.23	170.331	2.62817	743.163
1649	CCC1=CC=CC(CC)=C1N(COC)C(=O)CCl	TR	-3.17	269.772	2.9871	75.28	18	2	0	4	6	100	1	0	0	1	29.54	113.689	3.27661	384.531
1650	CCOP(=S)(OCC)SCSC1=CC=C(Cl)C=C1	TR	-6.05	342.875	5.4203	87.304	18	5	0	7	8	102	1	0	0	1	18.46	127.075	2.43148	389.78
1651	CCOP(=S)(OCC)SC(CCl)N1C(=O)C2=CC=CC=C2C1=O	TR	-5.85	393.854	3.8782	96.578	23	6	0	9	8	126	1	0	1	2	55.84	149.123	2.26862	612.419
1652	CC1OC(OC2C(O)CC(OC3C(O)CC(OC4CCC5(C)C(CCC6C5CC(O)C5(C)C(C7=CC(=O)OC7)CCC65O)C4)OC3C)OC2C)CC(O)C1O	TR	-4.16	780.949	2.2181	192.611	55	14	6	14	7	312	0	7	8	8	203.06	323.322	0.837498	1409
1653	O=S1OCC2C(CO1)C1(Cl)C(Cl)=C(Cl)C2(Cl)C1(Cl)Cl	V	-6.08	406.929	3.6898	77.3634	19	3	0	10	0	108	0	2	3	3	35.53	141.791	2.18773	470.183
1654	CCOP(=S)(OCC)OC1=CC=C(C=C1)[N+](=O)[O-]	TR	-4.29	291.265	3.2711	71.2614	18	6	0	8	7	100	1	0	0	1	70.83	110.265	2.8093	440.086
1655	CCCCN(CC)C(=O)SCCC	TR	-3.41	203.351	3.3716	60.3	13	2	0	3	6	78	0	0	0	0	20.31	86.0682	3.70553	138.886
1656	CCC1=CC=C(C(C2=CC=C(CC)C=C2)C(Cl)Cl)C=C1	TR	-7.04	307.264	5.747	88.977	20	0	0	2	5	106	2	0	0	2	0	131.285	2.33328	478.85
1657	CC12CCC3C(CC=C4CC(O)CCC43C)C1CCC2=O	V	-4.01	288.431	3.8792	82.7168	21	2	1	2	0	116	0	3	4	4	37.3	127.551	1.69235	507.696
1658	S(=O)(=O)(N)C1sC(NC(=O)C)nn1	V	-2.44	222.251	-0.8561	45.5859	13	6	2	9	2	72	1	0	0	1	115.04	78.0215	2.93869	422.352
1659	CN(C)CC\C=C1\C2CCCCC2CCC2CCCCC12	TR	-4.55	277.411	4.1686	90.542	21	1	0	1	3	108	2	0	1	3	3.24	127.472	2.06595	602.893
1660	C1C(Cl)CCC2SC3CCCCC3N(CCCN(C)C)C12	V	-5.07	318.873	4.8944	92.194	21	3	0	4	4	110	2	0	1	3	6.48	135.253	1.94376	642.437
1661	ClC1CCC(S(=O)(NC(=O)NCCC)=O)CC1	TR	-3.25	276.745	1.7379	65.4632	17	3	2	7	4	94	1	0	0	1	75.27	105.216	2.75035	484.777
1662	C1CC2C(CC1Cl)[nH]C(=O)o2	TR	-2.66	169.567	1.7745	41.8447	11	2	1	4	0	56	2	0	0	2	46	66.5918	2.92094	442.882
1663	O=C1[C@H](OC(C)=O)[C@H](C2CCC(OC)CC2)SC2CCCCC2N1CCN(C)C	TR	-3.16	414.527	3.3685	114.495	29	6	0	7	6	154	2	0	1	3	59.08	175.325	2.05585	869.371
1664	N\C(CCSCC1CsC(\N=C(\N)N)n1)=N\S(=O)(N)=O	TR	-2.65	337.456	-0.768	83.0924	20	6	4	12	7	112	1	0	0	1	175.83	124.286	2.36699	603.342
1665	S1(=O)(=O)NCNC2C1CC(S(=O)(N)=O)C(C2)C(F)(F)F	TR	-2.97	331.297	0.0141	61.6284	20	5	3	12	1	112	1	0	1	2	118.36	111.613	2.86774	770.892
1666	CCn1CC(C(=O)C2CCC(nC12)C)C(=O)O	TR	-3.61	232.239	1.42302	63.3733	17	4	1	5	2	88	2	0	0	2	72.19	97.3394	2.94674	658.584
1667	C1(NC(C(C2CCCCC2)(C(=O)N1)CC)=O)=O	V	-2.29	232.239	0.7004	60.0924	17	3	2	5	2	88	1	1	1	2	75.27	98.1995	2.53597	461.784
1668	CC(C)NCC(O)COC1CCCC2[nH]CCC12	TS	-3.79	248.326	1.9056	72.9392	18	3	3	4	6	98	2	0	0	2	57.28	106.97	1.91431	493.255
1669	NC1CCC(C(OCCN(CC)CC)=O)CC1	TR	-1.72	236.315	1.7674	68.9249	17	4	1	4	6	94	1	0	0	1	55.56	102.361	2.36946	344.942
1670	C1CN(CCN1)C1C(CC2C(n(CC(C(=O)O)C2=O)C2CCC(CC2)F)C1)F	V	-3.13	385.37	2.3767	101.503	28	5	2	8	3	144	3	1	1	4	74.57	158.177	2.01316	1120.23
1671	S(=O)(=O)(NC1nC(C)CC(n1)C)C1CCC(N)CC1	TR	-2.73	278.337	1.47644	73.1689	19	5	2	7	3	100	2	0	0	2	97.97	111.308	2.33051	675.919
1672	CC1=C(CC(O)=O)C2CC(F)CCC2C\1=C\C1CCC(CC1)S(C)=O	V	-4.5	356.418	4.3655	97.8922	25	2	1	5	4	128	2	0	1	3	54.37	147.519	2.10111	939.914
1673	C1(CC(CCC1C(C)C)C)O	TR	-2.19	150.221	2.82402	46.9328	11	1	1	1	1	60	1	0	0	1	20.23	67.6854	3.09272	251.05
1674	CC(=O)CC(C1CCCCC1)C1C(O)C2CCCCC2oC1=O	TR	-4.78	308.333	3.6096	87.7318	23	4	1	4	4	116	3	0	0	3	67.51	132.552	2.25807	909.551

## Sheet: Table S2
Table S2: List of 17 Aqsol descriptors. Selected descriptors in four models (CP-ANN 1, CP-ANN 2, CP-ANN 3, CP-ANN 4) are labeled with X.
MD abbreviation	Description	CP-ANN 1	CP-ANN 2	CP-ANN 3	CP-ANN 4
MolWt	Molecular weight	x	x	x	x
MolLogP	Octanol-water partition coefficient	x	x	x	x
MolMR	Molar refractivity	x	x	x	x
HeavyAtomCount	Number of non-H atoms	x	x
NumHAcceptors	Number of H acceptors	x	x	x	x
NumHDonors	Number of H donors	x	x		x
NumHeteroatoms	Number of atoms not carbon or hydrogen	x	x		x
NumRotatableBonds	Number of rotatable bonds	x	x
NumValenceElectrons	Number of valence electrons	x	x		x
NumAromaticRings	Number of aromatic rings	x	x
NumSaturatedRings	Number of saturated rings	x	x
NumAliphaticRings	Number of aliphatic rings	x	x
RingCount	Number of total rings	x	x	x
TPSA	Topological polar surface area	x	x
LabuteASA	Labute’s Approximate Surface Area	x	x
BalabanJ	Balaban’s J index (graph index)	x	x		x
BertzCT	topological complexity index of compound	x	x	x	x

## Sheet: Table S3
Table S3: RMSE of external set predictions for acute fish toxicity (FHM models), considering the applicability domain and outliers.
	The CP-BPE-ANN with 12 hidden neurons show the best performance, i.e. the lowest RMS error of the compounds in the external validation set.
	Considering only compounds within the applicability domain, all CP-BPE-ANN models with 12 hidden neurons show lower RMS error in prediction.
Model	1 Size	all compounds		2 AD		3 AD and without 3 worst predictions
		model 2	model 8	model 2	model 8	model 2	model 8
4 CP-ANN	/	1.01	0.98	0.71	0.84	0.62	0.77
CP-BPE-ANN	5	0.96	1.06	0.77	0.81	0.66	0.74
CP-BPE-ANN	10	0.94	1.06	0.7	0.85	0.61	0.78
CP-BPE-ANN	12	0.91	1.04	0.68	0.82	0.6	0.73
1 Number of neurons in the hidden layer of BPE-ANN.
2 Considering only the compounds in applicability domain.
3 Considering only the compounds in applicability domain without 3 worst predictions.
4 Previously published results (paper doi:10.1080/1062936x.2016.1196388).

## Sheet: Figure S1
	Figure S1: Experimental and predicted water solubility LogS, resulting from the CP-BP-ANN-2-2 model (Table 1).
		Test and validation data are shown in blue and red colour, respectively.
		The molecular structure of the outlier (ID 330, Table 2) is indicated by an arrow, structure shown on the right.
